# Supplementary material for: SARS-COV-2 δ variant drives the pandemic in India and Europe via two subvariants
Source: medRxiv preprint, doi:10.1101/2021.10.16.21265096, version 1 (2021-10-20)
Supplement: Acknowledgement table on the GISAID genomes used in this study [file 265096_file07.pdf]

We gratefully acknowledge the following Authors from the Originating laboratories responsible for obtaining the specimens, as well as the Submitting laboratories where the genome data were generated and shared via GISAID, on which this research is based.

All Submitters of data may be contacted directly via [www.gisaid.org](http://www.gisaid.org)

Authors are sorted alphabetically.

[illegible]

[illegible]
