# Supplementary material for: SARS-COV-2 δ variant drives the pandemic in India and Europe via two subvariants
Source: bioRxiv or medRxiv preprint supplement (doi:10.1101/2021.10.16.21265096), 2021-10-20
Supplement: Supplementary file [file media-1.pdf]

We gratefully acknowledge the following Authors from the Originating laboratories responsible for obtaining the specimens, as well as the Submitting laboratories where the genome data were generated and shared via GISAID, on which this research is based.

All Submitters of data may be contacted directly via [www.gisaid.org](http://www.gisaid.org)

Authors are sorted alphabetically.

| Accession ID                                                                                                                                                                                                                                                                                                                                                                                                                                                                                                                                                                                                                                                                                                                                                                                                                                                                                                                                                                                                                                                                                                                                                                                                                                                                                                                                                                                                                                                                                                                                                                                                                                                                                                                                                                                                                                                                                                                                                                                                                                                                                                                                                                                                                                                                                                                                                                                                                                                                                                                                                                                                                                                                                                                                                                                                                                                                                                                                                                                                                                                                                                                                                                                                                                                                                                                                                                                                                                                                                                                                                                                                                                                                                                                                                                                                                                                                                                                                                                                                                                                                                                                                                                                                                                                                                                                                                                                                                                                                                                                                                                                                                                                                                                                                                                                                                                                                                                                                                                                                                                                                                                                                                                                                                                                                                                                                                                                                                                                                                                                                                                                                                                                                                                                                                                                                                                                                                                                                                                                                                                                                                                                                                                                                                                                                                                                                                                                                                                                                                                                                                                                                                                                                                                                                                                                                                                                                                                                                                                                                                                                                                                                                                                                                                                                                                                                                                                                                                                                                                                                                                                                                                                                                                                                                                                                                                                                                                                                                                                                                                                                                                                                                                                                                                                                                                                                                                                                                                                                                                                                                                                                                                                                                                                                                                                                                                                                                                                                                                                                                                                                                                                                                                                                                                                                                                                                                                                                                                                                                                                                                                                                                                                                                                                                                                                                                                                                                                                                                                                                                                                                                                                                                                                                                                                                                                                                                                                                                                                                                                                                                                                                                                                                                                                                                                                                                                                                                                                                                                                                                                                                                                                                                                                                                                  | Originating Laboratory                                                                                                       | Submitting Laboratory                                                                                                        | Authors                                                                                                                                                                                                                                                                                                                          |                                                                                                                                                                                                                                                                                                       |
|-------------------------------------------------------------------------------------------------------------------------------------------------------------------------------------------------------------------------------------------------------------------------------------------------------------------------------------------------------------------------------------------------------------------------------------------------------------------------------------------------------------------------------------------------------------------------------------------------------------------------------------------------------------------------------------------------------------------------------------------------------------------------------------------------------------------------------------------------------------------------------------------------------------------------------------------------------------------------------------------------------------------------------------------------------------------------------------------------------------------------------------------------------------------------------------------------------------------------------------------------------------------------------------------------------------------------------------------------------------------------------------------------------------------------------------------------------------------------------------------------------------------------------------------------------------------------------------------------------------------------------------------------------------------------------------------------------------------------------------------------------------------------------------------------------------------------------------------------------------------------------------------------------------------------------------------------------------------------------------------------------------------------------------------------------------------------------------------------------------------------------------------------------------------------------------------------------------------------------------------------------------------------------------------------------------------------------------------------------------------------------------------------------------------------------------------------------------------------------------------------------------------------------------------------------------------------------------------------------------------------------------------------------------------------------------------------------------------------------------------------------------------------------------------------------------------------------------------------------------------------------------------------------------------------------------------------------------------------------------------------------------------------------------------------------------------------------------------------------------------------------------------------------------------------------------------------------------------------------------------------------------------------------------------------------------------------------------------------------------------------------------------------------------------------------------------------------------------------------------------------------------------------------------------------------------------------------------------------------------------------------------------------------------------------------------------------------------------------------------------------------------------------------------------------------------------------------------------------------------------------------------------------------------------------------------------------------------------------------------------------------------------------------------------------------------------------------------------------------------------------------------------------------------------------------------------------------------------------------------------------------------------------------------------------------------------------------------------------------------------------------------------------------------------------------------------------------------------------------------------------------------------------------------------------------------------------------------------------------------------------------------------------------------------------------------------------------------------------------------------------------------------------------------------------------------------------------------------------------------------------------------------------------------------------------------------------------------------------------------------------------------------------------------------------------------------------------------------------------------------------------------------------------------------------------------------------------------------------------------------------------------------------------------------------------------------------------------------------------------------------------------------------------------------------------------------------------------------------------------------------------------------------------------------------------------------------------------------------------------------------------------------------------------------------------------------------------------------------------------------------------------------------------------------------------------------------------------------------------------------------------------------------------------------------------------------------------------------------------------------------------------------------------------------------------------------------------------------------------------------------------------------------------------------------------------------------------------------------------------------------------------------------------------------------------------------------------------------------------------------------------------------------------------------------------------------------------------------------------------------------------------------------------------------------------------------------------------------------------------------------------------------------------------------------------------------------------------------------------------------------------------------------------------------------------------------------------------------------------------------------------------------------------------------------------------------------------------------------------------------------------------------------------------------------------------------------------------------------------------------------------------------------------------------------------------------------------------------------------------------------------------------------------------------------------------------------------------------------------------------------------------------------------------------------------------------------------------------------------------------------------------------------------------------------------------------------------------------------------------------------------------------------------------------------------------------------------------------------------------------------------------------------------------------------------------------------------------------------------------------------------------------------------------------------------------------------------------------------------------------------------------------------------------------------------------------------------------------------------------------------------------------------------------------------------------------------------------------------------------------------------------------------------------------------------------------------------------------------------------------------------------------------------------------------------------------------------------------------------------------------------------------------------------------------------------------------------------------------------------------------------------------------------------------------------------------------------------------------------------------------------------------------------------------------------------------------------------------------------------------------------------------------------------------------------------------------------------------------------------------------------------------------------------------------------------------------------------------------------------------------------------------------------------------------------------------------------------------------------------------------------------------------------------------------------------------------------------------------------------------------------------------------------------------------------------------------------------------------------------------------------------------------------------------------------------------------------------------------------------------------------------------------------------------------------------------------------------------------------------------------------------------------------------------------------------------------------------------------------------------------------------------------------------------------------------------------------------------------------------------------------------------------------------------------------------------------------------------------------------------------------------------------------------------------------------------------------------------------------------------------------------------------------------------------------------------------------------------------------------------------------------------------------------------------------------------------------------------------------------------------------------------------------------------------------------------------------------------------------------------------------------------------------------------------------------------------------------------------------------------------------------------------------------------------------------------------------------------------------------------------------------------------------------------------------------------------------------------------------------------------------------------------------------------------------------------------------------------------------------------------------------------------------------------------------------------------------------------------------|------------------------------------------------------------------------------------------------------------------------------|------------------------------------------------------------------------------------------------------------------------------|----------------------------------------------------------------------------------------------------------------------------------------------------------------------------------------------------------------------------------------------------------------------------------------------------------------------------------|-------------------------------------------------------------------------------------------------------------------------------------------------------------------------------------------------------------------------------------------------------------------------------------------------------|
| EPI_ISL_2502639                                                                                                                                                                                                                                                                                                                                                                                                                                                                                                                                                                                                                                                                                                                                                                                                                                                                                                                                                                                                                                                                                                                                                                                                                                                                                                                                                                                                                                                                                                                                                                                                                                                                                                                                                                                                                                                                                                                                                                                                                                                                                                                                                                                                                                                                                                                                                                                                                                                                                                                                                                                                                                                                                                                                                                                                                                                                                                                                                                                                                                                                                                                                                                                                                                                                                                                                                                                                                                                                                                                                                                                                                                                                                                                                                                                                                                                                                                                                                                                                                                                                                                                                                                                                                                                                                                                                                                                                                                                                                                                                                                                                                                                                                                                                                                                                                                                                                                                                                                                                                                                                                                                                                                                                                                                                                                                                                                                                                                                                                                                                                                                                                                                                                                                                                                                                                                                                                                                                                                                                                                                                                                                                                                                                                                                                                                                                                                                                                                                                                                                                                                                                                                                                                                                                                                                                                                                                                                                                                                                                                                                                                                                                                                                                                                                                                                                                                                                                                                                                                                                                                                                                                                                                                                                                                                                                                                                                                                                                                                                                                                                                                                                                                                                                                                                                                                                                                                                                                                                                                                                                                                                                                                                                                                                                                                                                                                                                                                                                                                                                                                                                                                                                                                                                                                                                                                                                                                                                                                                                                                                                                                                                                                                                                                                                                                                                                                                                                                                                                                                                                                                                                                                                                                                                                                                                                                                                                                                                                                                                                                                                                                                                                                                                                                                                                                                                                                                                                                                                                                                                                                                                                                                                                                                                               | All India Institute of Medical Sciences Delhi Hospital                                                                       | Virology Laboratory, AIIMS Delhi                                                                                             | Aashish Choudhary; Chitra Sarkar; Deepankar Srivany; Dibyabhava Pradhan; Jyoti Jethani; Lalit Dar; Lata Rani; Manish Soneja; Megha Brijwal; Nazneen Arif; Pooja Pandey; Puneet Kaur; Rakesh Lodha; Randeep Guleria; Ritu Gupta; Shivram Dhakad; Subrata Sinha; Sumedha Bagg                                                      |                                                                                                                                                                                                                                                                                                       |
| EPI_ISL_9101123, EPI_ISL_9101124, EPI_ISL_910125, EPI_ISL_910126, EPI_ISL_910127, EPI_ISL_910128, EPI_ISL_910129, EPI_ISL_910130, EPI_ISL_910131, EPI_ISL_910132, EPI_ISL_910133, EPI_ISL_910134, EPI_ISL_910135, EPI_ISL_910136, EPI_ISL_910137, EPI_ISL_910138, EPI_ISL_910139, EPI_ISL_910140, EPI_ISL_910141, EPI_ISL_910142, EPI_ISL_910143, EPI_ISL_910144, EPI_ISL_910145, EPI_ISL_910146, EPI_ISL_910147, EPI_ISL_910148, EPI_ISL_910149, EPI_ISL_910150, EPI_ISL_910151, EPI_ISL_910152, EPI_ISL_910153, EPI_ISL_910154, EPI_ISL_910155, EPI_ISL_910156, EPI_ISL_910157, EPI_ISL_910158, EPI_ISL_910159, EPI_ISL_910160, EPI_ISL_910161, EPI_ISL_910162, EPI_ISL_910163, EPI_ISL_910164, EPI_ISL_910165, EPI_ISL_910166, EPI_ISL_910167, EPI_ISL_910168, EPI_ISL_910169, EPI_ISL_910170, EPI_ISL_910171, EPI_ISL_910172, EPI_ISL_910173, EPI_ISL_910174, EPI_ISL_910175, EPI_ISL_910176, EPI_ISL_910177, EPI_ISL_910178, EPI_ISL_910179, EPI_ISL_910180, EPI_ISL_910181, EPI_ISL_910182, EPI_ISL_910183, EPI_ISL_910184, EPI_ISL_910185, EPI_ISL_910186, EPI_ISL_910187, EPI_ISL_910188, EPI_ISL_910189, EPI_ISL_910190, EPI_ISL_910191, EPI_ISL_910192, EPI_ISL_910193, EPI_ISL_910194, EPI_ISL_910195, EPI_ISL_910196, EPI_ISL_910197, EPI_ISL_910198, EPI_ISL_910199, EPI_ISL_910200, EPI_ISL_910201, EPI_ISL_910202, EPI_ISL_910203, EPI_ISL_910204, EPI_ISL_910205, EPI_ISL_910206, EPI_ISL_910207, EPI_ISL_910208, EPI_ISL_910209, EPI_ISL_910210, EPI_ISL_910211, EPI_ISL_910212, EPI_ISL_910213, EPI_ISL_910214, EPI_ISL_910215, EPI_ISL_910216, EPI_ISL_910217, EPI_ISL_910218, EPI_ISL_910219, EPI_ISL_910220, EPI_ISL_910221, EPI_ISL_910222, EPI_ISL_910223, EPI_ISL_910224, EPI_ISL_910225, EPI_ISL_910226, EPI_ISL_910227, EPI_ISL_910228, EPI_ISL_910229, EPI_ISL_910230, EPI_ISL_910231, EPI_ISL_910232, EPI_ISL_910233, EPI_ISL_910234, EPI_ISL_910235, EPI_ISL_910236, EPI_ISL_910237, EPI_ISL_910238, EPI_ISL_910239, EPI_ISL_910240, EPI_ISL_910241, EPI_ISL_910242, EPI_ISL_910243, EPI_ISL_910244, EPI_ISL_910245, EPI_ISL_910246, EPI_ISL_910247, EPI_ISL_910248, EPI_ISL_910249, EPI_ISL_910250, EPI_ISL_910251, EPI_ISL_910252, EPI_ISL_910253, EPI_ISL_910254, EPI_ISL_910255, EPI_ISL_910256, EPI_ISL_910257, EPI_ISL_910258, EPI_ISL_910259, EPI_ISL_910260, EPI_ISL_910261, EPI_ISL_910262, EPI_ISL_910263, EPI_ISL_910264, EPI_ISL_910265, EPI_ISL_910266, EPI_ISL_910267, EPI_ISL_910268, EPI_ISL_910269, EPI_ISL_910270, EPI_ISL_910271, EPI_ISL_910272, EPI_ISL_910273, EPI_ISL_910274, EPI_ISL_910275, EPI_ISL_910276, EPI_ISL_910277, EPI_ISL_910278, EPI_ISL_910279, EPI_ISL_910280, EPI_ISL_910281, EPI_ISL_910282, EPI_ISL_910283, EPI_ISL_910284, EPI_ISL_910285, EPI_ISL_910286, EPI_ISL_910287, EPI_ISL_910288, EPI_ISL_910289, EPI_ISL_910290, EPI_ISL_910291, EPI_ISL_910292, EPI_ISL_910293                                                                                                                                                                                                                                                                                                                                                                                                                                                                                                                                                                                                                                                                                                                                                                                                                                                                                                                                                                                                                                                                                                                                                                                                                                                                                                                                                                                                                                                                                                                                                                                                                                                                                                                                                                                                                                                                                                                                                                                                                                                                                                                                                                                                                                                                                                                                                                                                                                                                                                                                                                                                                                                                                                                                                                                                                                                                                                                                                                                                                                                                                                                                                                                                                                                                                                                                                                                                                                                                                                                                                                                                                                                                                                                                                                                                                                                                                                                                                                                                                                                                                                                                                                                                                                                                                                                                                                                                                                                                                                                                                                                                                                                                                                                                                                                                                                                                                                                                                                                                                                                                                                                                                                                                                                                                                                                                                                                                                                                                                                                                                                                                                                                                                                                                                                                                                                                                                                                                                                                                                                                                                                                                                                                                                                                                                                                                                                                                                                                                                                                                                                                                                                                                                                                                                                                                                                                                                                                                                                                                                                                                                                                                                                                                                                                                                                                                                                                                                                                                                                                                                                                                                                                                                                                                                                                                                                                                                                                                                                                                                                                                                                                                                                                                                                                                                                                                                                              | CSIR-Centre for Cellular and Molecular Biology                                                                               | CSIR-Centre for Cellular and Molecular Biology                                                                               | Archana Bharadwaj Siva; B Himasri; Blessy B John; Divya Tej Sowpati; Karthik Bharadwaj Tallapaka; Lamuk Zaveri; Namami Gaur; Payel Mukherjee; Pratheusa Maccha; Priya Singh; Purushotham Vodnal; Rakesh K Mishra; Sofia Banu; Tulasi Nagabandi; Viswagthe S L                                                                    |                                                                                                                                                                                                                                                                                                       |
| EPI_ISL_569859, EPI_ISL_569860, EPI_ISL_569861, EPI_ISL_569862, EPI_ISL_578080, EPI_ISL_578081, EPI_ISL_578168, EPI_ISL_578169, EPI_ISL_578170, EPI_ISL_578171, EPI_ISL_578172, EPI_ISL_578173, EPI_ISL_578174, EPI_ISL_578175, EPI_ISL_578176, EPI_ISL_578177, EPI_ISL_578178, EPI_ISL_578179, EPI_ISL_578180, EPI_ISL_578181, EPI_ISL_578182, EPI_ISL_578183, EPI_ISL_578184                                                                                                                                                                                                                                                                                                                                                                                                                                                                                                                                                                                                                                                                                                                                                                                                                                                                                                                                                                                                                                                                                                                                                                                                                                                                                                                                                                                                                                                                                                                                                                                                                                                                                                                                                                                                                                                                                                                                                                                                                                                                                                                                                                                                                                                                                                                                                                                                                                                                                                                                                                                                                                                                                                                                                                                                                                                                                                                                                                                                                                                                                                                                                                                                                                                                                                                                                                                                                                                                                                                                                                                                                                                                                                                                                                                                                                                                                                                                                                                                                                                                                                                                                                                                                                                                                                                                                                                                                                                                                                                                                                                                                                                                                                                                                                                                                                                                                                                                                                                                                                                                                                                                                                                                                                                                                                                                                                                                                                                                                                                                                                                                                                                                                                                                                                                                                                                                                                                                                                                                                                                                                                                                                                                                                                                                                                                                                                                                                                                                                                                                                                                                                                                                                                                                                                                                                                                                                                                                                                                                                                                                                                                                                                                                                                                                                                                                                                                                                                                                                                                                                                                                                                                                                                                                                                                                                                                                                                                                                                                                                                                                                                                                                                                                                                                                                                                                                                                                                                                                                                                                                                                                                                                                                                                                                                                                                                                                                                                                                                                                                                                                                                                                                                                                                                                                                                                                                                                                                                                                                                                                                                                                                                                                                                                                                                                                                                                                                                                                                                                                                                                                                                                                                                                                                                                                                                                                                                                                                                                                                                                                                                                                                                                                                                                                                                                                                                                | see above                                                                                                                    | CSIR-Indian Institute of Chemical Biology, MEDICA Superspecialty Hospital Kolkata                                            | CSIR-Indian Institute of Chemical Biology, MEDICA Superspecialty Hospital Kolkata                                                                                                                                                                                                                                                | Abhishake Lahiri; Debaleena Bhowmik; Dr. Partha Chakrabarti; Dr. Arpita Ghosh Mitra; Dr. Aviral Roy; Dr. Aviral Roy; Dr. AviralRoy; Dr. Partha Chakrabarti; Dr. Rajesh Pandey; Dr. Saikat Chakrabarti; Dr. Sandip Paul; Dr. Soumen Saha; Dr.Partha Chakrabarti; Priyanka Mallick; Sujay Krishna Maity |
| EPI_ISL_2714634, EPI_ISL_2714635, EPI_ISL_2714636, EPI_ISL_2714637, EPI_ISL_2714638, EPI_ISL_2714639, EPI_ISL_2714640, EPI_ISL_2714641, EPI_ISL_2714642, EPI_ISL_2714643, EPI_ISL_2714644, EPI_ISL_2714645, EPI_ISL_2714646, EPI_ISL_2714647, EPI_ISL_2714648, EPI_ISL_2714649, EPI_ISL_2714650                                                                                                                                                                                                                                                                                                                                                                                                                                                                                                                                                                                                                                                                                                                                                                                                                                                                                                                                                                                                                                                                                                                                                                                                                                                                                                                                                                                                                                                                                                                                                                                                                                                                                                                                                                                                                                                                                                                                                                                                                                                                                                                                                                                                                                                                                                                                                                                                                                                                                                                                                                                                                                                                                                                                                                                                                                                                                                                                                                                                                                                                                                                                                                                                                                                                                                                                                                                                                                                                                                                                                                                                                                                                                                                                                                                                                                                                                                                                                                                                                                                                                                                                                                                                                                                                                                                                                                                                                                                                                                                                                                                                                                                                                                                                                                                                                                                                                                                                                                                                                                                                                                                                                                                                                                                                                                                                                                                                                                                                                                                                                                                                                                                                                                                                                                                                                                                                                                                                                                                                                                                                                                                                                                                                                                                                                                                                                                                                                                                                                                                                                                                                                                                                                                                                                                                                                                                                                                                                                                                                                                                                                                                                                                                                                                                                                                                                                                                                                                                                                                                                                                                                                                                                                                                                                                                                                                                                                                                                                                                                                                                                                                                                                                                                                                                                                                                                                                                                                                                                                                                                                                                                                                                                                                                                                                                                                                                                                                                                                                                                                                                                                                                                                                                                                                                                                                                                                                                                                                                                                                                                                                                                                                                                                                                                                                                                                                                                                                                                                                                                                                                                                                                                                                                                                                                                                                                                                                                                                                                                                                                                                                                                                                                                                                                                                                                                                                                                                                                               | see above                                                                                                                    | Communicable Diseases, Interactive Research School for Health Affairs (IRSHA)                                                | Communicable Diseases, Interactive Research School for Health Affairs (IRSHA)                                                                                                                                                                                                                                                    | A.C.; Arankalle; Mishra; Modak, M.; Pisal; S.R.; Shrivastava, S.; V.A.; Virkar, R.                                                                                                                                                                                                                    |
| EPI_ISL_4392854                                                                                                                                                                                                                                                                                                                                                                                                                                                                                                                                                                                                                                                                                                                                                                                                                                                                                                                                                                                                                                                                                                                                                                                                                                                                                                                                                                                                                                                                                                                                                                                                                                                                                                                                                                                                                                                                                                                                                                                                                                                                                                                                                                                                                                                                                                                                                                                                                                                                                                                                                                                                                                                                                                                                                                                                                                                                                                                                                                                                                                                                                                                                                                                                                                                                                                                                                                                                                                                                                                                                                                                                                                                                                                                                                                                                                                                                                                                                                                                                                                                                                                                                                                                                                                                                                                                                                                                                                                                                                                                                                                                                                                                                                                                                                                                                                                                                                                                                                                                                                                                                                                                                                                                                                                                                                                                                                                                                                                                                                                                                                                                                                                                                                                                                                                                                                                                                                                                                                                                                                                                                                                                                                                                                                                                                                                                                                                                                                                                                                                                                                                                                                                                                                                                                                                                                                                                                                                                                                                                                                                                                                                                                                                                                                                                                                                                                                                                                                                                                                                                                                                                                                                                                                                                                                                                                                                                                                                                                                                                                                                                                                                                                                                                                                                                                                                                                                                                                                                                                                                                                                                                                                                                                                                                                                                                                                                                                                                                                                                                                                                                                                                                                                                                                                                                                                                                                                                                                                                                                                                                                                                                                                                                                                                                                                                                                                                                                                                                                                                                                                                                                                                                                                                                                                                                                                                                                                                                                                                                                                                                                                                                                                                                                                                                                                                                                                                                                                                                                                                                                                                                                                                                                                                                                               | Dr. Ishaan Gupta lab, Department of Biochemical Engineering and Biotechnology, Block I, Indian Institute of Technology Delhi | Dr. Ishaan Gupta lab, Department of Biochemical Engineering and Biotechnology, Block I, Indian Institute of Technology Delhi | Animesh Ray; Anjan Trikha; Anshul Budhraj; Anubhav Basu; Aruna Nambirajan; Atish Ghware; Chitra Sarkar; Dasari Abhilash; Deepali Jain; Ishaan Gupta; Madhuresh Sumit; Naveet Wig; Purva Mathur; Randeep Guleria; Ritu Gupta; S Arulselvi; Sachin Kumar; Seesandra Rajagopala; Suman Pakala                                       |                                                                                                                                                                                                                                                                                                       |
| EPI_ISL_4392851                                                                                                                                                                                                                                                                                                                                                                                                                                                                                                                                                                                                                                                                                                                                                                                                                                                                                                                                                                                                                                                                                                                                                                                                                                                                                                                                                                                                                                                                                                                                                                                                                                                                                                                                                                                                                                                                                                                                                                                                                                                                                                                                                                                                                                                                                                                                                                                                                                                                                                                                                                                                                                                                                                                                                                                                                                                                                                                                                                                                                                                                                                                                                                                                                                                                                                                                                                                                                                                                                                                                                                                                                                                                                                                                                                                                                                                                                                                                                                                                                                                                                                                                                                                                                                                                                                                                                                                                                                                                                                                                                                                                                                                                                                                                                                                                                                                                                                                                                                                                                                                                                                                                                                                                                                                                                                                                                                                                                                                                                                                                                                                                                                                                                                                                                                                                                                                                                                                                                                                                                                                                                                                                                                                                                                                                                                                                                                                                                                                                                                                                                                                                                                                                                                                                                                                                                                                                                                                                                                                                                                                                                                                                                                                                                                                                                                                                                                                                                                                                                                                                                                                                                                                                                                                                                                                                                                                                                                                                                                                                                                                                                                                                                                                                                                                                                                                                                                                                                                                                                                                                                                                                                                                                                                                                                                                                                                                                                                                                                                                                                                                                                                                                                                                                                                                                                                                                                                                                                                                                                                                                                                                                                                                                                                                                                                                                                                                                                                                                                                                                                                                                                                                                                                                                                                                                                                                                                                                                                                                                                                                                                                                                                                                                                                                                                                                                                                                                                                                                                                                                                                                                                                                                                                                                               | Dr. Ishaan Gupta lab, Department of Biochemical Engineering and Biotechnology, Block I, Indian Institute of Technology Delhi | Dr. Ishaan Gupta lab, Department of Biochemical Engineering and Biotechnology, Block I, Indian Institute of Technology Delhi | Animesh Ray; Anjan Trikha; Anshul Budhraj; Anubhav Basu; Aruna Nambirajan; Atish Ghware; Chitra Sarkar; Dasari Abhilash; Deepali Jain; Ishaan Gupta; Madhuresh Sumit; Naveet Wig; Purva Mathur; Randeep Guleria; Ritu Gupta; S Arulselvi; Sachin Kumar; Seesandra Rajagopala; Suman Pakala                                       |                                                                                                                                                                                                                                                                                                       |
| EPI_ISL_4392853                                                                                                                                                                                                                                                                                                                                                                                                                                                                                                                                                                                                                                                                                                                                                                                                                                                                                                                                                                                                                                                                                                                                                                                                                                                                                                                                                                                                                                                                                                                                                                                                                                                                                                                                                                                                                                                                                                                                                                                                                                                                                                                                                                                                                                                                                                                                                                                                                                                                                                                                                                                                                                                                                                                                                                                                                                                                                                                                                                                                                                                                                                                                                                                                                                                                                                                                                                                                                                                                                                                                                                                                                                                                                                                                                                                                                                                                                                                                                                                                                                                                                                                                                                                                                                                                                                                                                                                                                                                                                                                                                                                                                                                                                                                                                                                                                                                                                                                                                                                                                                                                                                                                                                                                                                                                                                                                                                                                                                                                                                                                                                                                                                                                                                                                                                                                                                                                                                                                                                                                                                                                                                                                                                                                                                                                                                                                                                                                                                                                                                                                                                                                                                                                                                                                                                                                                                                                                                                                                                                                                                                                                                                                                                                                                                                                                                                                                                                                                                                                                                                                                                                                                                                                                                                                                                                                                                                                                                                                                                                                                                                                                                                                                                                                                                                                                                                                                                                                                                                                                                                                                                                                                                                                                                                                                                                                                                                                                                                                                                                                                                                                                                                                                                                                                                                                                                                                                                                                                                                                                                                                                                                                                                                                                                                                                                                                                                                                                                                                                                                                                                                                                                                                                                                                                                                                                                                                                                                                                                                                                                                                                                                                                                                                                                                                                                                                                                                                                                                                                                                                                                                                                                                                                                                                               | Dr. Ishaan Gupta lab, Department of Biochemical Engineering and Biotechnology, Block I, Indian Institute of Technology Delhi | Dr. Ishaan Gupta lab, Department of Biochemical Engineering and Biotechnology, Block I, Indian Institute of Technology Delhi | Animesh Ray; Anjan Trikha; Anshul Budhraj; Anubhav Basu; Aruna Nambirajan; Atish Ghware; Chitra Sarkar; Dasari Abhilash; Deepali Jain; Ishaan Gupta; Madhuresh Sumit; Naveet Wig; Purva Mathur; Randeep Guleria; Ritu Gupta; S Arulselvi; Sachin Kumar; Seesandra Rajagopala; Suman Pakala                                       |                                                                                                                                                                                                                                                                                                       |
| EPI_ISL_586569, EPI_ISL_586570                                                                                                                                                                                                                                                                                                                                                                                                                                                                                                                                                                                                                                                                                                                                                                                                                                                                                                                                                                                                                                                                                                                                                                                                                                                                                                                                                                                                                                                                                                                                                                                                                                                                                                                                                                                                                                                                                                                                                                                                                                                                                                                                                                                                                                                                                                                                                                                                                                                                                                                                                                                                                                                                                                                                                                                                                                                                                                                                                                                                                                                                                                                                                                                                                                                                                                                                                                                                                                                                                                                                                                                                                                                                                                                                                                                                                                                                                                                                                                                                                                                                                                                                                                                                                                                                                                                                                                                                                                                                                                                                                                                                                                                                                                                                                                                                                                                                                                                                                                                                                                                                                                                                                                                                                                                                                                                                                                                                                                                                                                                                                                                                                                                                                                                                                                                                                                                                                                                                                                                                                                                                                                                                                                                                                                                                                                                                                                                                                                                                                                                                                                                                                                                                                                                                                                                                                                                                                                                                                                                                                                                                                                                                                                                                                                                                                                                                                                                                                                                                                                                                                                                                                                                                                                                                                                                                                                                                                                                                                                                                                                                                                                                                                                                                                                                                                                                                                                                                                                                                                                                                                                                                                                                                                                                                                                                                                                                                                                                                                                                                                                                                                                                                                                                                                                                                                                                                                                                                                                                                                                                                                                                                                                                                                                                                                                                                                                                                                                                                                                                                                                                                                                                                                                                                                                                                                                                                                                                                                                                                                                                                                                                                                                                                                                                                                                                                                                                                                                                                                                                                                                                                                                                                                                                                | GCRI,Ahmedabad                                                                                                               | Gujarat Biotechnology Research Centre                                                                                        | A M Kadri; Afzal Ansari; Apurvasinh Puv; Chaitanya Joshi; Dinesh Kumar; Harsh Bakshi; Harsha Panchal; Janvi Raval; Komal Patel; Labdhi Pandya; Madhvi Joshi; Maharshi Pandya; Monika Gandhi; Nidhi Patel; Nikha Trivedi; Nitin Savaiya; Parinl Trivedi; R D Dixit; Raghavendra Kumar; Shashank Pandya; Zarna Patel; Zuber Saiyed |                                                                                                                                                                                                                                                                                                       |
| EPI_ISL_2674194                                                                                                                                                                                                                                                                                                                                                                                                                                                                                                                                                                                                                                                                                                                                                                                                                                                                                                                                                                                                                                                                                                                                                                                                                                                                                                                                                                                                                                                                                                                                                                                                                                                                                                                                                                                                                                                                                                                                                                                                                                                                                                                                                                                                                                                                                                                                                                                                                                                                                                                                                                                                                                                                                                                                                                                                                                                                                                                                                                                                                                                                                                                                                                                                                                                                                                                                                                                                                                                                                                                                                                                                                                                                                                                                                                                                                                                                                                                                                                                                                                                                                                                                                                                                                                                                                                                                                                                                                                                                                                                                                                                                                                                                                                                                                                                                                                                                                                                                                                                                                                                                                                                                                                                                                                                                                                                                                                                                                                                                                                                                                                                                                                                                                                                                                                                                                                                                                                                                                                                                                                                                                                                                                                                                                                                                                                                                                                                                                                                                                                                                                                                                                                                                                                                                                                                                                                                                                                                                                                                                                                                                                                                                                                                                                                                                                                                                                                                                                                                                                                                                                                                                                                                                                                                                                                                                                                                                                                                                                                                                                                                                                                                                                                                                                                                                                                                                                                                                                                                                                                                                                                                                                                                                                                                                                                                                                                                                                                                                                                                                                                                                                                                                                                                                                                                                                                                                                                                                                                                                                                                                                                                                                                                                                                                                                                                                                                                                                                                                                                                                                                                                                                                                                                                                                                                                                                                                                                                                                                                                                                                                                                                                                                                                                                                                                                                                                                                                                                                                                                                                                                                                                                                                                                                                               | Government Institute of Medical Sciences, Greater Noida                                                                      | CSIR Institute of Genomics and Integrative Biology                                                                           | Abhinav Jain; Bani Jolly; Disha Sharma; Gyan Ranjan; Mohamed Imran; Mohit Kumar Divakar; Paras Sehgal; Rahul C Bhojar; Rakesh Gupta; Rashmi Upadhayay; Saurabh Srivastava; Sridhar Sivasubbu; Vinod Scaria; Vivek Gupta                                                                                                          |                                                                                                                                                                                                                                                                                                       |
| EPI_ISL_700218, EPI_ISL_700219, EPI_ISL_700220, EPI_ISL_700221, EPI_ISL_700222, EPI_ISL_700223, EPI_ISL_700224, EPI_ISL_700225, EPI_ISL_700226, EPI_ISL_700227, EPI_ISL_700228, EPI_ISL_700229, EPI_ISL_700230, EPI_ISL_700231, EPI_ISL_700232, EPI_ISL_700233, EPI_ISL_700234, EPI_ISL_700235, EPI_ISL_700236, EPI_ISL_700237, EPI_ISL_700238, EPI_ISL_700239, EPI_ISL_700240, EPI_ISL_700241, EPI_ISL_700242, EPI_ISL_700243, EPI_ISL_700244, EPI_ISL_700245, EPI_ISL_700246, EPI_ISL_700247, EPI_ISL_700248, EPI_ISL_700249, EPI_ISL_700250, EPI_ISL_700251, EPI_ISL_700252, EPI_ISL_700253, EPI_ISL_700254, EPI_ISL_700255, EPI_ISL_700256, EPI_ISL_700257, EPI_ISL_700258, EPI_ISL_700259, EPI_ISL_700260, EPI_ISL_700261, EPI_ISL_700262, EPI_ISL_700263, EPI_ISL_700264, EPI_ISL_700265, EPI_ISL_700266, EPI_ISL_700267, EPI_ISL_700268, EPI_ISL_700269, EPI_ISL_700270, EPI_ISL_700271, EPI_ISL_700272, EPI_ISL_700273, EPI_ISL_700274, EPI_ISL_700275, EPI_ISL_700276, EPI_ISL_700277, EPI_ISL_700278, EPI_ISL_700279, EPI_ISL_700280, EPI_ISL_700281, EPI_ISL_700282, EPI_ISL_700283, EPI_ISL_700284, EPI_ISL_700285, EPI_ISL_700286, EPI_ISL_700287, EPI_ISL_700288, EPI_ISL_700289, EPI_ISL_700290, EPI_ISL_700291, EPI_ISL_700292, EPI_ISL_700293, EPI_ISL_700294, EPI_ISL_700295, EPI_ISL_700296, EPI_ISL_700297, EPI_ISL_700298, EPI_ISL_700299, EPI_ISL_700300, EPI_ISL_700301, EPI_ISL_700302, EPI_ISL_700303, EPI_ISL_700304, EPI_ISL_700305, EPI_ISL_700306, EPI_ISL_700307, EPI_ISL_700308, EPI_ISL_700309, EPI_ISL_700310, EPI_ISL_700311, EPI_ISL_700312, EPI_ISL_700313, EPI_ISL_700314, EPI_ISL_700315, EPI_ISL_700316, EPI_ISL_700317, EPI_ISL_700318, EPI_ISL_700319, EPI_ISL_700320, EPI_ISL_700321, EPI_ISL_700322, EPI_ISL_700323, EPI_ISL_700324, EPI_ISL_700325, EPI_ISL_700326, EPI_ISL_700327, EPI_ISL_700328, EPI_ISL_700329, EPI_ISL_700330, EPI_ISL_700331, EPI_ISL_700332, EPI_ISL_700333, EPI_ISL_700334, EPI_ISL_700335, EPI_ISL_700336, EPI_ISL_700337, EPI_ISL_700338, EPI_ISL_700339, EPI_ISL_700340, EPI_ISL_700341, EPI_ISL_700342, EPI_ISL_700343, EPI_ISL_700344, EPI_ISL_700345, EPI_ISL_700346, EPI_ISL_700347, EPI_ISL_700348, EPI_ISL_700349, EPI_ISL_700350, EPI_ISL_700351, EPI_ISL_700352, EPI_ISL_700353, EPI_ISL_700354, EPI_ISL_700355, EPI_ISL_700356, EPI_ISL_700357, EPI_ISL_700358, EPI_ISL_700359, EPI_ISL_700360, EPI_ISL_700361, EPI_ISL_700362, EPI_ISL_700363, EPI_ISL_700364, EPI_ISL_700365, EPI_ISL_700366, EPI_ISL_700367, EPI_ISL_700368, EPI_ISL_700369, EPI_ISL_700370, EPI_ISL_700371, EPI_ISL_700372, EPI_ISL_700373, EPI_ISL_700374, EPI_ISL_700375, EPI_ISL_700376, EPI_ISL_700377, EPI_ISL_700378, EPI_ISL_700379, EPI_ISL_700380, EPI_ISL_700381, EPI_ISL_700382, EPI_ISL_700383, EPI_ISL_700384, EPI_ISL_700385, EPI_ISL_700386, EPI_ISL_700387, EPI_ISL_700388, EPI_ISL_700389, EPI_ISL_700390, EPI_ISL_700391, EPI_ISL_700392, EPI_ISL_700393, EPI_ISL_700394, EPI_ISL_700395, EPI_ISL_700396, EPI_ISL_700397, EPI_ISL_700398, EPI_ISL_700399, EPI_ISL_700400, EPI_ISL_700401, EPI_ISL_700402, EPI_ISL_700403, EPI_ISL_700404, EPI_ISL_700405, EPI_ISL_700406, EPI_ISL_700407, EPI_ISL_700408, EPI_ISL_700409, EPI_ISL_700410, EPI_ISL_700411, EPI_ISL_700412, EPI_ISL_700413, EPI_ISL_700414, EPI_ISL_700415, EPI_ISL_700416, EPI_ISL_700417, EPI_ISL_700418, EPI_ISL_700419, EPI_ISL_700420, EPI_ISL_700421, EPI_ISL_700422, EPI_ISL_700423, EPI_ISL_700424, EPI_ISL_700425, EPI_ISL_700426, EPI_ISL_700427, EPI_ISL_700428, EPI_ISL_700429, EPI_ISL_700430, EPI_ISL_700431, EPI_ISL_700432, EPI_ISL_700433, EPI_ISL_700434, EPI_ISL_700435, EPI_ISL_700436, EPI_ISL_700437, EPI_ISL_700438, EPI_ISL_700439, EPI_ISL_700440, EPI_ISL_700441, EPI_ISL_700442, EPI_ISL_700443, EPI_ISL_700444, EPI_ISL_700445, EPI_ISL_700446, EPI_ISL_700447, EPI_ISL_700448, EPI_ISL_700449, EPI_ISL_700450, EPI_ISL_700451, EPI_ISL_700452, EPI_ISL_700453, EPI_ISL_700454, EPI_ISL_700455, EPI_ISL_700456, EPI_ISL_700457, EPI_ISL_700458, EPI_ISL_700459, EPI_ISL_700460, EPI_ISL_700461, EPI_ISL_700462, EPI_ISL_700463, EPI_ISL_700464, EPI_ISL_700465, EPI_ISL_700466, EPI_ISL_700467, EPI_ISL_700468, EPI_ISL_700469, EPI_ISL_700470, EPI_ISL_700471, EPI_ISL_700472, EPI_ISL_700473, EPI_ISL_700474, EPI_ISL_700475, EPI_ISL_700476, EPI_ISL_700477, EPI_ISL_700478, EPI_ISL_700479, EPI_ISL_700480, EPI_ISL_700481, EPI_ISL_700482, EPI_ISL_700483, EPI_ISL_700484, EPI_ISL_700485, EPI_ISL_700486, EPI_ISL_700487, EPI_ISL_700488, EPI_ISL_700489, EPI_ISL_700490, EPI_ISL_700491, EPI_ISL_700492, EPI_ISL_700493, EPI_ISL_700494, EPI_ISL_700495, EPI_ISL_700496, EPI_ISL_700497, EPI_ISL_700498, EPI_ISL_700499, EPI_ISL_700500, EPI_ISL_700501, EPI_ISL_700502, EPI_ISL_700503, EPI_ISL_700504, EPI_ISL_700505, EPI_ISL_700506, EPI_ISL_700507, EPI_ISL_700508, EPI_ISL_700509, EPI_ISL_700510, EPI_ISL_700511, EPI_ISL_700512, EPI_ISL_700513, EPI_ISL_700514, EPI_ISL_700515, EPI_ISL_700516, EPI_ISL_700517, EPI_ISL_700518, EPI_ISL_700519, EPI_ISL_700520, EPI_ISL_700521, EPI_ISL_700522, EPI_ISL_700523, EPI_ISL_700524, EPI_ISL_700525, EPI_ISL_700526, EPI_ISL_700527, EPI_ISL_700528, EPI_ISL_700529, EPI_ISL_700530, EPI_ISL_700531, EPI_ISL_700532, EPI_ISL_700533, EPI_ISL_700534, EPI_ISL_700535, EPI_ISL_700536, EPI_ISL_700537, EPI_ISL_700538, EPI_ISL_700539, EPI_ISL_700540, EPI_ISL_700541, EPI_ISL_700542, EPI_ISL_700543, EPI_ISL_700544, EPI_ISL_700545, EPI_ISL_700546, EPI_ISL_700547, EPI_ISL_700548, EPI_ISL_700549, EPI_ISL_700550, EPI_ISL_700551, EPI_ISL_700552, EPI_ISL_700553, EPI_ISL_700554, EPI_ISL_700555, EPI_ISL_700556, EPI_ISL_700557, EPI_ISL_700558, EPI_ISL_700559, EPI_ISL_700560, EPI_ISL_700561, EPI_ISL_700562, EPI_ISL_700563, EPI_ISL_700564, EPI_ISL_700565, EPI_ISL_700566, EPI_ISL_700567, EPI_ISL_700568, EPI_ISL_700569, EPI_ISL_700570, EPI_ISL_700571, EPI_ISL_700572, EPI_ISL_700573, EPI_ISL_700574, EPI_ISL_700575, EPI_ISL_700576, EPI_ISL_700577, EPI_ISL_700578, EPI_ISL_700579, EPI_ISL_700580, EPI_ISL_700581, EPI_ISL_700582, EPI_ISL_700583, EPI_ISL_700584, EPI_ISL_700585, EPI_ISL_700586, EPI_ISL_700587, EPI_ISL_700588, EPI_ISL_700589, EPI_ISL_700590, EPI_ISL_700591, EPI_ISL_700592, EPI_ISL_700593, EPI_ISL_700594, EPI_ISL_700595, EPI_ISL_700596, EPI_ISL_700597, EPI_ISL_700598, EPI_ISL_700599, EPI_ISL_700600, EPI_ISL_700601, EPI_ISL_700602, EPI_ISL_700603, EPI_ISL_700604, EPI_ISL_700605, EPI_ISL_700606, EPI_ISL_700607, EPI_ISL_700608, EPI_ISL_700609, EPI_ISL_700610, EPI_ISL_700611, EPI_ISL_700612, EPI_ISL_700613, EPI_ISL_700614, EPI_ISL_700615, EPI_ISL_700616, EPI_ISL_700617, EPI_ISL_700618, EPI_ISL_700619, EPI_ISL_700620, EPI_ISL_700621, EPI_ISL_700622, EPI_ISL_700623, EPI_ISL_700624, EPI_ISL_700625, EPI_ISL_700626, EPI_ISL_700627, EPI_ISL_700628, EPI_ISL_700629, EPI_ISL_700630, EPI_ISL_700631, EPI_ISL_700632, EPI_ISL_700633, EPI_ISL_700634, EPI_ISL_700635, EPI_ISL_700636, EPI_ISL_700637, EPI_ISL_700638, EPI_ISL_700639, EPI_ISL_700640, EPI_ISL_700641, EPI_ISL_700642, EPI_ISL_700643, EPI_ISL_700644, EPI_ISL_700645, EPI_ISL_700646, EPI_ISL_700647, EPI_ISL_700648, EPI_ISL_700649, EPI_ISL_700650, EPI_ISL_700651, EPI_ISL_700652, EPI_ISL_700653, EPI_ISL_700654, EPI_ISL_700655, EPI_ISL_700656, EPI_ISL_700657, EPI_ISL_700658, EPI_ISL_700659, EPI_ISL_700660, EPI_ISL_700661, EPI_ISL_700662, EPI_ISL_700663, EPI_ISL_700664, EPI_ISL_700665, EPI_ISL_700666, EPI_ISL_700667, EPI_ISL_700668, EPI_ISL_700669, EPI_ISL_700670, EPI_ISL_700671, EPI_ISL_700672, EPI_ISL_700673, EPI_ISL_700674, EPI_ISL_700675, EPI_ISL_700676, EPI_ISL_700677, EPI_ISL_700678, EPI_ISL_700679, EPI_ISL_700680, EPI_ISL_700681, EPI_ISL_700682, EPI_ISL_700683, EPI_ISL_700684, EPI_ISL_700685, EPI_ISL_700686, EPI_ISL_700687, EPI_ISL_700688, EPI_ISL_700689, EPI_ISL_700690, EPI_ISL_700691, EPI_ISL_700692, EPI_ISL_700693, EPI_ISL_700694, EPI_ISL_700695, EPI_ISL_700696, EPI_ISL_700697, EPI_ISL_700698, EPI_ISL_700699, EPI_ISL_700700, EPI_ISL_700701, EPI_ISL_700702, EPI_ISL_700703, EPI_ISL_700704, EPI_ISL_700705, EPI_ISL_700706, EPI_ISL_700707, EPI_ISL_700708, EPI_ISL_700709, EPI_ISL_700710, EPI_ISL_700711, EPI_ISL_700712, EPI_ISL_700713, EPI_ISL_700714, EPI_ISL_700715, EPI_ISL_700716, EPI_ISL_700717, EPI_ISL_700718, EPI_ISL_700719, EPI_ISL_700720, EPI_ISL_700721, EPI_ISL_700722, EPI_ISL_700723, EPI_ISL_700724, EPI_ISL_700725, EPI_ISL_700726, EPI_ISL_700727, EPI_ISL_700728, EPI_ISL_700729, EPI_ISL_700730, EPI_ISL_700731, EPI_ISL_700732, EPI_ISL_700733, EPI_ISL_700734, EPI_ISL_700735, EPI_ISL_700736, EPI_ISL_700737, EPI_ISL_700738, EPI_ISL_700739, EPI_ISL_700740, EPI_ISL_700741, EPI_ISL_700742, EPI_ISL_700743, EPI_ISL_700744, EPI_ISL_700745, EPI_ISL_700746, EPI_ISL_700747, EPI_ISL_700748, EPI_ISL_700749, EPI_ISL_700750, EPI_ISL_700751, EPI_ISL_700752, EPI_ISL_700753, EPI_ISL_700754, EPI_ISL_700755, EPI_ISL_700756, EPI_ISL_700757, EPI_ISL_700758, EPI_ISL_700759, EPI_ISL_700760, EPI_ISL_700761, EPI_ISL_700762, EPI_ISL_700763, EPI_ISL_700764, EPI_ISL_700765, EPI_ISL_700766, EPI_ISL_700767, EPI_ISL_700768, EPI_ISL_700769, EPI_ISL_700770, EPI_ISL_700771, EPI_ISL_700772, EPI_ISL_700773, EPI_ISL_700774, EPI_ISL_700775, EPI_ISL_700776, EPI_ISL_700777, EPI_ISL_700778, EPI_ISL_700779, EPI_ISL_700780, EPI_ISL_700781, EPI_ISL_700782, EPI_ISL_700783, EPI_ISL_700784, EPI_ISL_700785, EPI_ISL_700786, EPI_ISL_700787, EPI_ISL_700788, EPI_ISL_700789, EPI_ISL_700790, EPI_ISL_700791, EPI_ISL_700792, EPI_ISL_700793, EPI_ISL_700794, EPI_ISL_700795, EPI_ISL_700796, EPI_ISL_700797, EPI_ISL_700798, EPI_ISL_700799, EPI_ISL_700800, EPI_ISL_700801, EPI_ISL_700802, EPI_ISL_700803, EPI_ISL_700804, EPI_ISL_700805, EPI_ISL_700806, EPI_ISL_700807, EPI_ISL_700808, EPI_ISL_700809, EPI_ISL_700810, EPI_ISL_700811, EPI_ISL_700812, EPI_ISL_700813, EPI_ISL_700814, EPI_ISL_700815, EPI_ISL_700816, EPI_ISL_700817, EPI_ISL_700818, EPI_ISL_700819, EPI_ISL_700820, EPI_ISL_700821, EPI_ISL_700822, EPI_ISL_700823, EPI_ISL_700824, EPI_ISL_700825, EPI_ISL_700826, EPI_ISL_700827, EPI_ISL_700828, EPI_ISL_700829, EPI_ISL_700830, EPI_ISL_700831, EPI_ISL_700832, EPI_ISL_700833, EPI_ISL_700834, EPI_ISL_700835, EPI_ISL_700836, EPI_ISL_700837, EPI_ISL_700838, EPI_ISL_700839, EPI_ISL_700840, EPI_ISL_700841, EPI_ISL_700842, EPI_ISL_700843, EPI_ISL_700844, EPI_ISL_700845, EPI_ISL_700846, EPI_ISL_700847, EPI_ISL_700848, EPI_ISL_700849, EPI_ISL_700850, EPI_ISL_700851, EPI_ISL_700852, EPI_ISL_700853, EPI_ISL_700854, EPI_ISL_700855, EPI_ISL_700856, EPI_ISL_700857, EPI_ISL_700858, EPI_ISL_700859, EPI_ISL_700860, EPI_ISL_700861, EPI_ISL_700862, EPI_ISL_700863, EPI_ISL_700864, EPI_ISL_700865, EPI_ISL_700866, EPI_ISL_700867, EPI_ISL_700868, EPI_ISL_700869, EPI_ISL_700870, EPI_ISL_700871, EPI_ISL_700872, EPI_ISL_700873, EPI_ISL_700874, EPI_ISL_700875, EPI_ISL_700876, EPI_ISL_700877, EPI_ISL_700878, EPI_ISL_700879, EPI_ISL_700880, EPI_ISL_700881, EPI_ISL_700882, EPI_ISL_700883, EPI_ISL_700884, EPI_ISL_700885, EPI_ISL_700886, EPI_ISL_700887, EPI_ISL_700888, EPI_ISL_700889, EPI_ISL_700890, EPI_ISL_70089 |                                                                                                                              |                                                                                                                              |                                                                                                                                                                                                                                                                                                                                  |                                                                                                                                                                                                                                                                                                       |

EPI\_ISL\_779705, EPI\_ISL\_779706,  
EPI\_ISL\_779708, EPI\_ISL\_779710

The Foundation for Medical Research

The Foundation for Medical Research

Shruthi Sachidanandan; Shrutika Pophale; Shweta Kawankar; Subrat Thanapati; Suresh Poojari; Swapneil Parikh; Utkarsha Yelve; Vasil Nachan  
Ambreen Shaikh; Ayan Mandal; Grishma Patel; Jayanthi Shastri; Kalpana Sriraman; Kayzad Nilgiriwala; Nerges Mistry; Nirjhar Chatterjee; Shreevatsa Udupa; Smriti Vaswani; Swapneil Parikh; Tejal Mestry

EPI\_ISL\_1708331, EPI\_ISL\_1708332, EPI\_ISL\_1708333, EPI\_ISL\_1708341, EPI\_ISL\_1708353, EPI\_ISL\_1708354, EPI\_ISL\_1708355, EPI\_ISL\_1708356, EPI\_ISL\_1708357, EPI\_ISL\_1708359, EPI\_ISL\_1708360, EPI\_ISL\_1708362, EPI\_ISL\_1708363, EPI\_ISL\_1708364, EPI\_ISL\_1708365, EPI\_ISL\_1708366, EPI\_ISL\_1708367, EPI\_ISL\_1708368, EPI\_ISL\_1708369, EPI\_ISL\_1708370, EPI\_ISL\_1708371, EPI\_ISL\_1708372,  
EPI\_ISL\_1708373, EPI\_ISL\_1708374, EPI\_ISL\_1708375, EPI\_ISL\_1708376, EPI\_ISL\_1708377, EPI\_ISL\_1708378, EPI\_ISL\_1708379, EPI\_ISL\_1708380, EPI\_ISL\_1708381

see above

Thindlu PHC

inStem NCBS - INSACOG

Uma Ramakrishnan Dasaradhi Palakodeti Aswin SaiNarain
