# Supplementary material for: SARS-COV-2 δ variant drives the pandemic in India and Europe via two subvariants
Source: bioRxiv or medRxiv preprint supplement (doi:10.1101/2021.10.16.21265096), 2021-10-20
Supplement: Supplementary file [file media-2.pdf]

We gratefully acknowledge the following Authors from the Originating laboratories responsible for obtaining the specimens, as well as the Submitting laboratories where the genome data were generated and shared via GISAID, on which this research is based.

All Submitters of data may be contacted directly via [www.gisaid.org](http://www.gisaid.org)

Authors are sorted alphabetically.

| Accession ID                                                                                                                                                                                                                                                                                                                                                                                                                                                                                                                                                                                                                                                                                                                                                                                                                                                                                                                                                                                                                                                                                                                   | Originating Laboratory                                                                         | Submitting Laboratory                                                 | Authors                                                                                                                                                                                                                                                                                                                                                                                                                                                                                                                                                                                                                                         |
|--------------------------------------------------------------------------------------------------------------------------------------------------------------------------------------------------------------------------------------------------------------------------------------------------------------------------------------------------------------------------------------------------------------------------------------------------------------------------------------------------------------------------------------------------------------------------------------------------------------------------------------------------------------------------------------------------------------------------------------------------------------------------------------------------------------------------------------------------------------------------------------------------------------------------------------------------------------------------------------------------------------------------------------------------------------------------------------------------------------------------------|------------------------------------------------------------------------------------------------|-----------------------------------------------------------------------|-------------------------------------------------------------------------------------------------------------------------------------------------------------------------------------------------------------------------------------------------------------------------------------------------------------------------------------------------------------------------------------------------------------------------------------------------------------------------------------------------------------------------------------------------------------------------------------------------------------------------------------------------|
| EPI_ISL_1663507, EPI_ISL_1663516, EPI_ISL_1663522, EPI_ISL_1663523                                                                                                                                                                                                                                                                                                                                                                                                                                                                                                                                                                                                                                                                                                                                                                                                                                                                                                                                                                                                                                                             | AIIMS, Patna                                                                                   | Institute of Life Sciences - INSACOG                                  | Ajay Parida; Amol M. Kanampalliwar; Arup Ghosh; Atimukta Jha; INSACOG Consortium; Punit Prasad; Rajeeb Swain; Rupesh Dash; Safal Wallia; Shifu Aggarwal; Sunil K. Raghav                                                                                                                                                                                                                                                                                                                                                                                                                                                                        |
| EPI_ISL_2231794                                                                                                                                                                                                                                                                                                                                                                                                                                                                                                                                                                                                                                                                                                                                                                                                                                                                                                                                                                                                                                                                                                                | AP SSO                                                                                         | CSIR-Centre for Cellular and Molecular Biology-INSACOG                | Amreshwar Vodapalli; Ara Sreenivas; Archana Bharadwaj Siva; B Himasri; Blessy B John; Divya Tej Sowpati; Karthik Bharadwaj Tallapaka; Lamuk Zaveri; Payel Mukherjee; Rakesh K Mishra; Sharath Chandra Thota; Shreekant Verma; Sofia Banu; Tulasi Nagabandi; Valli Nagalakshmi Undamata; Viswagithe S L                                                                                                                                                                                                                                                                                                                                          |
| EPI_ISL_2426214                                                                                                                                                                                                                                                                                                                                                                                                                                                                                                                                                                                                                                                                                                                                                                                                                                                                                                                                                                                                                                                                                                                | All India Institute of Medical Sciences, Delhi                                                 | CSIR Institute of Genomics and Integrative Biology                    | Abhinav Jain; Afra Shamnath; Anjali Bajaj; Arvinden VR; Bani Jolly; COVID CBNAAT CORE GROUP; Kiran Bala; Mercy Rophina; Mohamed Imran; Mohit Kumar Divakar; Nayer Jamshed; Praveen Aggarwal; Rahul C. Bhoyar; Rama Chaudhry; Randeep Guleria; Ritu Gupta; Sridhar Sivasubbu; Subrata Sinha; Urvasi B Singh; Vigneshwar Senthivel; Vinod Scaria                                                                                                                                                                                                                                                                                                  |
| EPI_ISL_2484895, EPI_ISL_2484897, EPI_ISL_2484898                                                                                                                                                                                                                                                                                                                                                                                                                                                                                                                                                                                                                                                                                                                                                                                                                                                                                                                                                                                                                                                                              | Amdavad Municipal Corporation, Ahmedabad                                                       | Gujarat Biotechnology Research Centre                                 | Chaitanya Joshi; Dalip Singh Rathore; Dinesh Kumar; Hiren Mandali; Madhvi Joshi; Manish Kumar; Nitin Savaliya; Ramesh Pandit; Sonal Sharma; Twinkle Soni                                                                                                                                                                                                                                                                                                                                                                                                                                                                                        |
| EPI_ISL_2391488                                                                                                                                                                                                                                                                                                                                                                                                                                                                                                                                                                                                                                                                                                                                                                                                                                                                                                                                                                                                                                                                                                                | BJ Medical College and Civil Hospital, Ahmedabad                                               | Gujarat Biotechnology Research Centre                                 | Chaitanya Joshi; Dinesh Kumar; Janvi Ravai; Madhvi Joshi; Nitesh Shah; Nitin Savaliya; Pranay Shah; Ramesh Pandit; Sonal Sharma; Twinkle Soni; Umang Mishra; Zarna Patel; Zuber Saiyed                                                                                                                                                                                                                                                                                                                                                                                                                                                          |
| EPI_ISL_4127507, EPI_ISL_4127551, EPI_ISL_4127751, EPI_ISL_4128439, EPI_ISL_4128445, EPI_ISL_4128459, EPI_ISL_4128988, EPI_ISL_4129060, EPI_ISL_4129066, EPI_ISL_4129374, EPI_ISL_4129602, EPI_ISL_4129749, EPI_ISL_4129855                                                                                                                                                                                                                                                                                                                                                                                                                                                                                                                                                                                                                                                                                                                                                                                                                                                                                                    | see above<br>BJMC, Pune                                                                        | IISER Pune                                                            | Aurnab Ghose; Joy Merwin Monteiro; Krishanpal Karmodiya; Rajesh Karyakarte; Suvarna Joshi                                                                                                                                                                                                                                                                                                                                                                                                                                                                                                                                                       |
| EPI_ISL_4415477, EPI_ISL_4415478, EPI_ISL_4415482, EPI_ISL_4415487, EPI_ISL_4415488, EPI_ISL_4415491, EPI_ISL_4415492, EPI_ISL_4415496, EPI_ISL_4415497, EPI_ISL_4415500, EPI_ISL_4415504, EPI_ISL_4415505, EPI_ISL_4415506, EPI_ISL_4415507, EPI_ISL_4415524, EPI_ISL_4415531, EPI_ISL_4415572, EPI_ISL_4415599, EPI_ISL_4415608, EPI_ISL_4415631, EPI_ISL_4415639, EPI_ISL_4415664, EPI_ISL_4415680, EPI_ISL_4415684, EPI_ISL_4415686, EPI_ISL_4415736, EPI_ISL_4415748, EPI_ISL_4415749, EPI_ISL_4415751, EPI_ISL_4415753                                                                                                                                                                                                                                                                                                                                                                                                                                                                                                                                                                                                   | see above<br>BJMC, Pune                                                                        | IISER Pune-INSACOG                                                    | Aurnab Ghose; Joy Merwin Monteiro; Krishanpal Karmodiya; Rajesh Karyakarte; Suvarna Joshi                                                                                                                                                                                                                                                                                                                                                                                                                                                                                                                                                       |
| EPI_ISL_1663247, EPI_ISL_2342659, EPI_ISL_2342868, EPI_ISL_2342873, EPI_ISL_2342878                                                                                                                                                                                                                                                                                                                                                                                                                                                                                                                                                                                                                                                                                                                                                                                                                                                                                                                                                                                                                                            | BRLSABVM Government Medical College, Rajnandgaon, Chhattisgarh                                 | Institute of Life Sciences - INSACOG                                  | Ajay Parida; Amol M. Kanampalliwar; Arup Ghosh; Atimukta Jha; INSACOG Consortium; Omprakash Shiriwas; Punit Prasad; Rajeeb Swain; Rupesh Dash; Safal Wallia; Sana Fatma; Shifu Aggarwal; Sunil K. Raghav                                                                                                                                                                                                                                                                                                                                                                                                                                        |
| EPI_ISL_2373501, EPI_ISL_2373524, EPI_ISL_2373545                                                                                                                                                                                                                                                                                                                                                                                                                                                                                                                                                                                                                                                                                                                                                                                                                                                                                                                                                                                                                                                                              | Banaras Hindu University                                                                       | CSIR-Centre for Cellular and Molecular Biology-INSACOG                | ; Abhay Kumar Yadav; Ajay Kumar Yadav; Amreshwar Vodapalli; Ara Sreenivas; Archana Bharadwaj Siva; Ashish; B Himasri; Blessy B John; Chetan Sahni; Deepa Devadas; Divya Tej Sowpati; Gunjan Rai; Gyaneshwer Chaube; Jaya Chakraborty; Karthik Bharadwaj Tallapaka; Lamuk Zaveri; Maneesha Upadhyay; Manpreet Kaur; Nitish Kumar Singh; Payel Mukherjee; Priyoneel Basu; Rakesh K Mishra; Royana Singh; Saumya Singh; Saurabh Singh; Shani Vishwakarma; Sharath Chandra Thota; Shivam Tiwari; Shivani Mishra; Shreekant Verma; Sofia Banu; Surendra Pratap Mishra; Tulasi Nagabandi; Umesh Choudhary; Valli Nagalakshmi Undamata; Viswagithe S L |
| EPI_ISL_1970221, EPI_ISL_1970223, EPI_ISL_1970224, EPI_ISL_1970286                                                                                                                                                                                                                                                                                                                                                                                                                                                                                                                                                                                                                                                                                                                                                                                                                                                                                                                                                                                                                                                             | Biotechnology Division, NCDC Delhi                                                             | NCDC Delhi, Biotechnology Division                                    | Hema Gogia; Hemlata Lall; Kalaiarasan Ponnusamy; Mahesh S Dhar; Manoj K Singh; Meena Datta; Partha Rakshit; Preeti Madan; Priyanka Singh; Radhakrishnan V. S; Robin Marwal; Sandhya Kabra; Sujeet K Singh; Uma Sharma                                                                                                                                                                                                                                                                                                                                                                                                                           |
| EPI_ISL_1663304, EPI_ISL_1663307, EPI_ISL_1663308, EPI_ISL_1663312                                                                                                                                                                                                                                                                                                                                                                                                                                                                                                                                                                                                                                                                                                                                                                                                                                                                                                                                                                                                                                                             | CIIMS, Bilaspur, Chhattisgarh                                                                  | Institute of Life Sciences - INSACOG                                  | Ajay Parida; Amol M. Kanampalliwar; Arup Ghosh; Atimukta Jha; INSACOG Consortium; Punit Prasad; Rajeeb Swain; Rupesh Dash; Safal Wallia; Shifu Aggarwal; Sunil K. Raghav                                                                                                                                                                                                                                                                                                                                                                                                                                                                        |
| EPI_ISL_1838398, EPI_ISL_1838463, EPI_ISL_1838549, EPI_ISL_1838787, EPI_ISL_1838805, EPI_ISL_1838806, EPI_ISL_1838809, EPI_ISL_1838811, EPI_ISL_1838812, EPI_ISL_1838814, EPI_ISL_1838828, EPI_ISL_2660993, EPI_ISL_2661022                                                                                                                                                                                                                                                                                                                                                                                                                                                                                                                                                                                                                                                                                                                                                                                                                                                                                                    | see above                                                                                      | CSIR-Centre for Cellular and Molecular Biology                        | ; Amreshwar Vodapalli; Ara Sreenivas; Archana Bharadwaj Siva; B Himasri; Blessy B John; Divya Tej Sowpati; Karthik Bharadwaj Tallapaka; Lamuk Zaveri; Onkar Kulkarni; Payel Mukherjee; Priya Nurkurthy; Rakesh K Mishra; Sharath Chandra Thota; Shreekant Verma; Sofia Banu; Sumedha Avadhanula; Tulasi Nagabandi; Valli Nagalakshmi Undamata; Vidhyadhari Methuku; Viswagithe S L                                                                                                                                                                                                                                                              |
| EPI_ISL_4546215, EPI_ISL_4546225, EPI_ISL_4546243                                                                                                                                                                                                                                                                                                                                                                                                                                                                                                                                                                                                                                                                                                                                                                                                                                                                                                                                                                                                                                                                              | CSIR-Centre for Cellular and Molecular Biology - INSACOG                                       | CSIR-Centre for Cellular and Molecular Biology - INSACOG              | Amreshwar Vodapalli; Ara Sreenivas; Archana Bharadwaj Siva; B Himasri; Divya Tej Sowpati; Jandhyala Sai Krishna; Karthik Bharadwaj Tallapaka; Lamuk Zaveri; Onkar Kulkarni; Payel Mukherjee; Priya Nurkurthy; Rakesh K Mishra; Shreekant Verma; Sofia Banu; Sumedha Avadhanula; Tulasi Nagabandi; Valli Nagalakshmi Undamata; Vidhyadhari Methuku                                                                                                                                                                                                                                                                                               |
| EPI_ISL_1916411, EPI_ISL_1916412, EPI_ISL_1916414, EPI_ISL_1916417, EPI_ISL_1916423, EPI_ISL_1916424, EPI_ISL_1916433, EPI_ISL_1916434, EPI_ISL_1916442, EPI_ISL_1916445, EPI_ISL_1916446, EPI_ISL_1916454, EPI_ISL_1916456, EPI_ISL_1916464, EPI_ISL_1916465, EPI_ISL_1916468, EPI_ISL_1916475, EPI_ISL_1916476, EPI_ISL_1916486, EPI_ISL_1916489                                                                                                                                                                                                                                                                                                                                                                                                                                                                                                                                                                                                                                                                                                                                                                             | see above                                                                                      | CSIR-Centre for Cellular and Molecular Biology - INSACOG              | Amreshwar Vodapalli; Ara Sreenivas; B Himasri; Divya Tej Sowpati; Karthik Bharadwaj Tallapaka; Krishna Khairam; Lamuk Zaveri; Onkar Kulkarni; Rakesh K Mishra; Sharath Chandra Thota; Shreekant Verma; Sofia Banu; Viswagithe S L                                                                                                                                                                                                                                                                                                                                                                                                               |
| EPI_ISL_2441372, EPI_ISL_2441385, EPI_ISL_2441386                                                                                                                                                                                                                                                                                                                                                                                                                                                                                                                                                                                                                                                                                                                                                                                                                                                                                                                                                                                                                                                                              | CSIR-National Environmental Engineering Research Institute                                     | CSIR-Centre for Cellular and Molecular Biology-INSACOG                | Amreshwar Vodapalli; Ara Sreenivas; Archana Bharadwaj Siva; B Himasri; Divya Tej Sowpati; Karthik Bharadwaj Tallapaka; Krishna Khairam; Lamuk Zaveri; Onkar Kulkarni; Payel Mukherjee; Priya Nurkurthy; Rakesh K Mishra; Shreekant Verma; Sofia Banu; Sumedha Avadhanula; Tulasi Nagabandi; Valli Nagalakshmi Undamata; Vidhyadhari Methuku                                                                                                                                                                                                                                                                                                     |
| EPI_ISL_2106967                                                                                                                                                                                                                                                                                                                                                                                                                                                                                                                                                                                                                                                                                                                                                                                                                                                                                                                                                                                                                                                                                                                | Centre for DNA Fingerprinting and Diagnostics                                                  | CFDF -INSACOG                                                         | Ashwin Dalal; Asmita Gupta; Divya Vashisht; Murali Bashyam; Pratyusha Bala; Vinay Donipadi                                                                                                                                                                                                                                                                                                                                                                                                                                                                                                                                                      |
| EPI_ISL_3006894, EPI_ISL_3006917                                                                                                                                                                                                                                                                                                                                                                                                                                                                                                                                                                                                                                                                                                                                                                                                                                                                                                                                                                                                                                                                                               | Chhattisgarh Institute of Medical Sciences (CIMS), Bilaspur                                    | Institute of Life Sciences - INSACOG                                  | Ajay Parida; Amol M. Kanampalliwar; Arup Ghosh; Atimukta Jha; INSACOG Consortium; Omprakash Shiriwas; Punit Prasad; Rajeeb Swain; Rupesh Dash; Safal Wallia; Sana Fatma; Shifu Aggarwal; Sunil K. Raghav                                                                                                                                                                                                                                                                                                                                                                                                                                        |
| EPI_ISL_3276964, EPI_ISL_3276972, EPI_ISL_3276984, EPI_ISL_3276988, EPI_ISL_3276995, EPI_ISL_3276998, EPI_ISL_3277001, EPI_ISL_3277085, EPI_ISL_3277087, EPI_ISL_3277136                                                                                                                                                                                                                                                                                                                                                                                                                                                                                                                                                                                                                                                                                                                                                                                                                                                                                                                                                       | see above                                                                                      | Clinical Virology Laboratory, Institute of Liver and Biliary Sciences | ILBS<br>Amit Pandey; Chhagan Bihari Sharma; Diptanu Paul; Ekta Gupta; Reshu Agarwal; Shiv Kumar Sarin; Varun Suroliya                                                                                                                                                                                                                                                                                                                                                                                                                                                                                                                           |
| EPI_ISL_4415410, EPI_ISL_4415411, EPI_ISL_4415412, EPI_ISL_4415413, EPI_ISL_4415414, EPI_ISL_4415415, EPI_ISL_4415416, EPI_ISL_4415417, EPI_ISL_4415418, EPI_ISL_4415419, EPI_ISL_4415420, EPI_ISL_4415421, EPI_ISL_4415422, EPI_ISL_4415423, EPI_ISL_4415424, EPI_ISL_4415425, EPI_ISL_4415426, EPI_ISL_4415427, EPI_ISL_4415428, EPI_ISL_4415429, EPI_ISL_4415430, EPI_ISL_4415431, EPI_ISL_4415432, EPI_ISL_4415433, EPI_ISL_4415434, EPI_ISL_4415435, EPI_ISL_4415436, EPI_ISL_4415437, EPI_ISL_4415438, EPI_ISL_4415439, EPI_ISL_4415440, EPI_ISL_4415441, EPI_ISL_4415527, EPI_ISL_4415528, EPI_ISL_4415533, EPI_ISL_4415604, EPI_ISL_4415605, EPI_ISL_4415610, EPI_ISL_4415613, EPI_ISL_4415614, EPI_ISL_4415616, EPI_ISL_4415621, EPI_ISL_4415623, EPI_ISL_4415634, EPI_ISL_4415636, EPI_ISL_4415641, EPI_ISL_4415642, EPI_ISL_4415646, EPI_ISL_4415649, EPI_ISL_4415650, EPI_ISL_4415652, EPI_ISL_4415653, EPI_ISL_4415666, EPI_ISL_4415667, EPI_ISL_4415672, EPI_ISL_4415673, EPI_ISL_4415678, EPI_ISL_4415679, EPI_ISL_4415681, EPI_ISL_4415685, EPI_ISL_4415704, EPI_ISL_4415721, EPI_ISL_4415733, EPI_ISL_4415739 | see above                                                                                      | Department of Microbiology, Government Medical College, Baramati      | IISER Pune-INSACOG<br>Aurnab Ghose; Joy Merwin Monteiro; Krishanpal Karmodiya                                                                                                                                                                                                                                                                                                                                                                                                                                                                                                                                                                   |
| EPI_ISL_1662291                                                                                                                                                                                                                                                                                                                                                                                                                                                                                                                                                                                                                                                                                                                                                                                                                                                                                                                                                                                                                                                                                                                | Dept. Of Microbiology, Lt. Baliram Kashyap Memorial Govt. Medical college, Dimrapal, Jagdalpur | Institute of Life Sciences - INSACOG                                  | Ajay Parida; Amol M. Kanampalliwar; Arup Ghosh; Atimukta Jha; INSACOG Consortium; Punit Prasad; Rajeeb Swain; Rupesh Dash; Safal Wallia; Shifu Aggarwal; Sunil K. Raghav                                                                                                                                                                                                                                                                                                                                                                                                                                                                        |
| EPI_ISL_2379462, EPI_ISL_2379496, EPI_ISL_2379497, EPI_ISL_2379498, EPI_ISL_2379564, EPI_ISL_2379645, EPI_ISL_2379646, EPI_ISL_2379647, EPI_ISL_2379648, EPI_ISL_2379649                                                                                                                                                                                                                                                                                                                                                                                                                                                                                                                                                                                                                                                                                                                                                                                                                                                                                                                                                       | see above                                                                                      | Dr S Raju, Director of Public Health and Preventive Medicine          | inStem NCBS - INSACOG<br>Uma Ramakrishnan Dasaradhi Palakodeti Aswin SaiNarain                                                                                                                                                                                                                                                                                                                                                                                                                                                                                                                                                                  |
| EPI_ISL_2521821, EPI_ISL_2521940, EPI_ISL_2521941, EPI_ISL_2521942, EPI_ISL_2521943                                                                                                                                                                                                                                                                                                                                                                                                                                                                                                                                                                                                                                                                                                                                                                                                                                                                                                                                                                                                                                            | Dr S raju, Director of public health and preventive medicine                                   | inStem NCBS - INSACOG                                                 | Uma Ramakrishnan Dasaradhi Palakodeti Aswin SaiNarain                                                                                                                                                                                                                                                                                                                                                                                                                                                                                                                                                                                           |
| EPI_ISL_2723800, EPI_ISL_2723801, EPI_ISL_2723830, EPI_ISL_2723831, EPI_ISL_2723917, EPI_ISL_2723922, EPI_ISL_2723923, EPI_ISL_2723924, EPI_ISL_2723925, EPI_ISL_2723926, EPI_ISL_2723927, EPI_ISL_2723976                                                                                                                                                                                                                                                                                                                                                                                                                                                                                                                                                                                                                                                                                                                                                                                                                                                                                                                     | see above                                                                                      | Dr S raju, Director of public health and preventive medicine          | inStem NCBS - INSACOG<br>Uma Ramakrishnan Dasaradhi Palakodeti Aswin SaiNarain                                                                                                                                                                                                                                                                                                                                                                                                                                                                                                                                                                  |
| EPI_ISL_4106468                                                                                                                                                                                                                                                                                                                                                                                                                                                                                                                                                                                                                                                                                                                                                                                                                                                                                                                                                                                                                                                                                                                | Dr. B. Lal Institute of Biotechnology                                                          | Dr. B. Lal Institute of Biotechnology                                 | Dr. Aditi Nag & Dr Sudipti Arora                                                                                                                                                                                                                                                                                                                                                                                                                                                                                                                                                                                                                |
| EPI_ISL_4197532, EPI_ISL_4198119, EPI_ISL_4198392                                                                                                                                                                                                                                                                                                                                                                                                                                                                                                                                                                                                                                                                                                                                                                                                                                                                                                                                                                                                                                                                              | Dr. B. Lal Institute of Biotechnology, Jaipur                                                  | Dr. B. Lal Institute of Biotechnology, Jaipur                         | Aditi Nag and Sudipti Arora                                                                                                                                                                                                                                                                                                                                                                                                                                                                                                                                                                                                                     |
| EPI_ISL_2341931, EPI_ISL_2341932                                                                                                                                                                                                                                                                                                                                                                                                                                                                                                                                                                                                                                                                                                                                                                                                                                                                                                                                                                                                                                                                                               | FM Medical College, Balasore                                                                   | Institute of Life Sciences - INSACOG                                  | Ajay Parida; Amol M. Kanampalliwar; Arup Ghosh; Atimukta Jha; INSACOG Consortium; Omprakash Shiriwas; Punit Prasad; Rajeeb Swain; Rupesh Dash; Safal Wallia; Sana Fatma; Shifu Aggarwal; Sunil K. Raghav                                                                                                                                                                                                                                                                                                                                                                                                                                        |
| EPI_ISL_2001139, EPI_ISL_2001143                                                                                                                                                                                                                                                                                                                                                                                                                                                                                                                                                                                                                                                                                                                                                                                                                                                                                                                                                                                                                                                                                               | GMERS, Government Medical College, Gandhinagar                                                 | Gujarat Biotechnology Research Centre                                 | Chaitanya Joshi; Dinesh Kumar; Gaurishankar Shrimali; Janvi Ravai; Madhvi Joshi; Nitesh Shah; Nitin Savaliya; Ramesh Pandit; Sonal Sharma; Twinkle Soni; Umang Mishra; Zarna Patel; Zuber Saiyed                                                                                                                                                                                                                                                                                                                                                                                                                                                |
| EPI_ISL_1940019                                                                                                                                                                                                                                                                                                                                                                                                                                                                                                                                                                                                                                                                                                                                                                                                                                                                                                                                                                                                                                                                                                                | GOVIMDRAJ NAGAR                                                                                | inStem NCBS - INSACOG                                                 | Uma Ramakrishnan Dasaradhi Palakodeti Aswin SaiNarain                                                                                                                                                                                                                                                                                                                                                                                                                                                                                                                                                                                           |
| EPI_ISL_4125682, EPI_ISL_4125687, EPI_ISL_4125712                                                                                                                                                                                                                                                                                                                                                                                                                                                                                                                                                                                                                                                                                                                                                                                                                                                                                                                                                                                                                                                                              | Genepath, Pune                                                                                 | IISER Pune                                                            | Aurnab Ghose; Joy Merwin Monteiro; Krishanpal Karmodiya; Rajesh Karyakarte; Suvarna Joshi                                                                                                                                                                                                                                                                                                                                                                                                                                                                                                                                                       |
| EPI_ISL_3007890, EPI_ISL_3007902, EPI_ISL_3007905, EPI_ISL_3007906, EPI_ISL_3007916                                                                                                                                                                                                                                                                                                                                                                                                                                                                                                                                                                                                                                                                                                                                                                                                                                                                                                                                                                                                                                            | Government Medical College, Bettiah                                                            | Institute of Life Sciences - INSACOG                                  | Ajay Parida; Amol M. Kanampalliwar; Arup Ghosh; Atimukta Jha; INSACOG Consortium; Omprakash Shiriwas; Punit Prasad; Rajeeb Swain; Rupesh Dash; Safal Wallia; Sana Fatma; Shifu Aggarwal; Sunil K. Raghav                                                                                                                                                                                                                                                                                                                                                                                                                                        |
| EPI_ISL_1940001, EPI_ISL_1940002, EPI_ISL_1940003, EPI_ISL_1940004, EPI_ISL_1940008, EPI_ISL_1940011, EPI_ISL_1940013, EPI_ISL_1940014, EPI_ISL_1940015                                                                                                                                                                                                                                                                                                                                                                                                                                                                                                                                                                                                                                                                                                                                                                                                                                                                                                                                                                        | see above                                                                                      | HOSAHALLI<br>inStem NCBS - INSACOG                                    | Uma Ramakrishnan Dasaradhi Palakodeti Aswin SaiNarain                                                                                                                                                                                                                                                                                                                                                                                                                                                                                                                                                                                           |
| EPI_ISL_2530319                                                                                                                                                                                                                                                                                                                                                                                                                                                                                                                                                                                                                                                                                                                                                                                                                                                                                                                                                                                                                                                                                                                | Hematopathology Laboratory, ACTREC, TMC                                                        | Hematopathology Laboratory, ACTREC, TMC                               | ACTREC, Hematopathology Laboratory                                                                                                                                                                                                                                                                                                                                                                                                                                                                                                                                                                                                              |
| EPI_ISL_2189572, EPI_ISL_2189596, EPI_ISL_2189726, EPI_ISL_2189770, EPI_ISL_2555672                                                                                                                                                                                                                                                                                                                                                                                                                                                                                                                                                                                                                                                                                                                                                                                                                                                                                                                                                                                                                                            | ICMR-National Institute of Virology                                                            | NCDC Delhi, Biotechnology Division                                    | A Walimbe; A.Awhale; A.Titkare; B Apoorva; G.Divekar; H.Kengale; Hema Gogia; Hemlata Lall; K P.Shinde; K.Iyengar; K.Korabu; Kalaiarasan Ponnusamy; M L Choudhary; M.Das; Mahesh S Dhar; Manoj K Singh; Meena Datta; Partha Rakshit; Preeti Madan; Priyanka Singh; R.Verma; Radhakrishnan V. S; Robin Marwal; S Jadhav; S.Bhorekar; S.Jadhav; S.Shelkande; Sandhya Kabra; Sujeet K Singh; T.Sanjevi; U.Saha; Uma Sharma; V Malik; V.Autude; V.Vipat; Z. Sayyed                                                                                                                                                                                   |
| EPI_ISL_1703662, EPI_ISL_1703668, EPI_ISL_1703740, EPI_ISL_1703878, EPI_ISL_1704234, EPI_ISL_1704561, EPI_ISL_1704605, EPI_ISL_1704617, EPI_ISL_1704618, EPI_ISL_1704620, EPI_ISL_1704625, EPI_ISL_1704626, EPI_ISL_1704627, EPI_ISL_1704628, EPI_ISL_1704629, EPI_ISL_1704630, EPI_ISL_1704632, EPI_ISL_1704634, EPI_ISL_1704635, EPI_ISL_1704636, EPI_ISL_1704637, EPI_ISL_1704638, EPI_ISL_1704639, EPI_ISL_1841293, EPI_ISL_1841317, EPI_ISL_1841318, EPI_ISL_1841355, EPI_ISL_1841356, EPI_ISL_1841357, EPI_ISL_1841366, EPI_ISL_1841367, EPI_ISL_1841382, EPI_ISL_1841383, EPI_ISL_1928407, EPI_ISL_1928417, EPI_ISL_1928439, EPI_ISL_1928457, EPI_ISL_1928462, EPI_ISL_1928477, EPI_ISL_1928484, EPI_ISL_1970422, EPI_ISL_2131509, EPI_ISL_2546013,                                                                                                                                                                                                                                                                                                                                                                     |                                                                                                |                                                                       |                                                                                                                                                                                                                                                                                                                                                                                                                                                                                                                                                                                                                                                 |



|                                                                                                                                                                                                                                                                                |                                                                                |                                                                     |                                                                                                                                                                                                                                                                                                                                                                                                                                                                                                                                            |
|--------------------------------------------------------------------------------------------------------------------------------------------------------------------------------------------------------------------------------------------------------------------------------|--------------------------------------------------------------------------------|---------------------------------------------------------------------|--------------------------------------------------------------------------------------------------------------------------------------------------------------------------------------------------------------------------------------------------------------------------------------------------------------------------------------------------------------------------------------------------------------------------------------------------------------------------------------------------------------------------------------------|
| see above                                                                                                                                                                                                                                                                      | RUHS College of Medical Sciences                                               | CSIR-Centre for Cellular and Molecular Biology - INSACOG            | Amreshwar Vodapalli; Ara Sreenivas; Archana Bharadwaj Siva; B Himasri; Divya Tej Sowpati; Dr. Gaurav Dalela; Dr. Jitendra Panda; Dr. Nilofer Khayyam; Dr. Raja Babu Panwar; Dr. Rajeev Gupta; Dr. Ramesh Sharma; Dr. Sonali Sharma; Dr. Sudhanshu Kacker; Dr. Vaseem Naheed Baig; Jandhyala Sai Krishna; Karthik Bharadwaj Tallapaka; Lamuk Zaveri; Onkar Kulkarni; Payel Mukherjee; Priya Nurkurthy; Rakesh K Mishra; Shreekant Verma; Sofia Banu; Sumedha Avadhanula; Tulasi Nagabandi; Valli Nagalakshmi Undamatla; Vidhyadhari Methuku |
| EPI_ISL_4104093                                                                                                                                                                                                                                                                | Rajendra Memorial Research Institute of Medical Sciences                       | Institute of Life Sciences-INSACOG                                  | Ajay Parida; Amol M. Kanampalliwar; Arup Ghosh; Atimukta Jha; INSACOG Consortium; Punit Prasad; Rajeeb Swain; Rupesh Dash; Safal Wallia; Sana Fatma; Shifu Aggarwal; Sunil K. Raghav                                                                                                                                                                                                                                                                                                                                                       |
| EPI_ISL_2341852, EPI_ISL_2341853, EPI_ISL_2341855, EPI_ISL_2341856, EPI_ISL_2341859                                                                                                                                                                                            | S.C.B. Medical College and Hospital, Cuttack                                   | Institute of Life Sciences - INSACOG                                | Ajay Parida; Amol M. Kanampalliwar; Arup Ghosh; Atimukta Jha; INSACOG Consortium; Omprakash Shiriwas; Punit Prasad; Rajeeb Swain; Rupesh Dash; Safal Wallia; Sana Fatma; Shifu Aggarwal; Sunil K. Raghav                                                                                                                                                                                                                                                                                                                                   |
| EPI_ISL_2341727                                                                                                                                                                                                                                                                | SLN Medical College and Hospital, Koraput                                      | Institute of Life Sciences - INSACOG                                | Ajay Parida; Amol M. Kanampalliwar; Arup Ghosh; Atimukta Jha; INSACOG Consortium; Omprakash Shiriwas; Punit Prasad; Rajeeb Swain; Rupesh Dash; Safal Wallia; Sana Fatma; Shifu Aggarwal; Sunil K. Raghav                                                                                                                                                                                                                                                                                                                                   |
| EPI_ISL_3717689                                                                                                                                                                                                                                                                | SMIMER Hospital & Medical College, Surat                                       | Gujarat Biotechnology Research Centre                               | Arpit Shukla; Bhadreshsinh Gohil; Chaitanya Joshi; Dinesh Kumar; Janvi Raval; Madhvi Joshi; Manish Patel; Nimesh Patel; Nitin Shukla; Ramesh Pandit; Zarna Patel                                                                                                                                                                                                                                                                                                                                                                           |
| EPI_ISL_1939974                                                                                                                                                                                                                                                                | SUBRAMNAYA NAGAR                                                               | inStem NCBS - INSACOG                                               | Uma Ramakrishnan Dasaradhi Palakodeti Aswin SaiNarain                                                                                                                                                                                                                                                                                                                                                                                                                                                                                      |
| EPI_ISL_1914584, EPI_ISL_1914588, EPI_ISL_1914591, EPI_ISL_1914592, EPI_ISL_1914593, EPI_ISL_1914594, EPI_ISL_1914595, EPI_ISL_1914596, EPI_ISL_1969753, EPI_ISL_2098718, EPI_ISL_2098719, EPI_ISL_2098720, EPI_ISL_2098722, EPI_ISL_2307108, EPI_ISL_2620740                  | State Virus Research and Diagnostic Laboratory (VRDL), AIIMS Raipur            | State Virus Research and Diagnostic Laboratory (VRDL), AIIMS Raipur | Anudita Bhargava; Jijyan Chandrawanshi; Kuldeep Sharma; MD Rafiqullah Khan; Priyanka Singh; Pushpendra Singh; Sanjay Singh Negi; Somya Sharma                                                                                                                                                                                                                                                                                                                                                                                              |
| see above                                                                                                                                                                                                                                                                      | The National Centre for Cell Science                                           | CSIR-Centre for Cellular and Molecular Biology-INSACOG              | Ajay Pillai; Amareshwar Vodapalli; Ara Sreenivas; Archana Bharadwaj Siva; B Himasri; Blessy B John; Dhiraj Paul; Divya Tej Sowpati; INSACOG Consortium team; Karthik Bharadwaj Tallapaka; Lamuk Zaveri; Manoj Kumar Bhat; Mitali Inamdar; Mohak P Gujar; Onkar Kulkarni; Payel Mukherjee; Rakesh K Mishra; Sharath Chandra Thota; Shivang P. Bhanushali; Shreekant Verma; Sofia Banu; Sonal Manik Chavan; Tulasi Nagabandi; Valli Nagalakshmi Undamatla; Viswagithe S L; Yogesh Shouche                                                    |
| EPI_ISL_2017748                                                                                                                                                                                                                                                                | VRDL, Government Medical College (GMC) and Hospital, Valsad                    | Gujarat Biotechnology Research Centre                               | Chaitanya Joshi; Dinesh Kumar; Janvi Raval; Madhvi Joshi; Nitesh Shah; Nitin Savaliya; Ramesh Pandit; Sonal Sharma; Twinkle Soni; Umang Mishra; Vicky Gandhi; Zarna Patel; Zuber Saiyed                                                                                                                                                                                                                                                                                                                                                    |
| EPI_ISL_2001187, EPI_ISL_2001188, EPI_ISL_2001189, EPI_ISL_2001190, EPI_ISL_2001191, EPI_ISL_2001192, EPI_ISL_2001193, EPI_ISL_2001194, EPI_ISL_2001211, EPI_ISL_2001212, EPI_ISL_2017728, EPI_ISL_2017731, EPI_ISL_2017734, EPI_ISL_2017735, EPI_ISL_2017737, EPI_ISL_2017738 | VRDL, Government Medical College (GMC), Surat                                  | Gujarat Biotechnology Research Centre                               | Chaitanya Joshi; Dinesh Kumar; Janvi Raval; Madhvi Joshi; Neeta Khandelwal; Nitesh Shah; Nitin Savaliya; Ramesh Pandit; Sonal Sharma; Twinkle Soni; Umang Mishra; Zarna Patel; Zuber Saiyed                                                                                                                                                                                                                                                                                                                                                |
| EPI_ISL_3844272                                                                                                                                                                                                                                                                | VRDL, P. D. U. Medical College, Rajkot                                         | Gujarat Biotechnology Research Centre                               | Arpit Shukla; Bhadreshsinh Gohil; Chaitanya Joshi; Dinesh Kumar; Gauravi A Dhruva; Janvi Raval; Madhvi Joshi; Nimesh Patel; Nitin Shukla; Ramesh Pandit; Zarna Patel                                                                                                                                                                                                                                                                                                                                                                       |
| EPI_ISL_3162096                                                                                                                                                                                                                                                                | VRDL, Government Medical College Surat                                         | Gujarat Biotechnology Research Centre                               | Chaitanya Joshi; Dinesh Kumar; Janvi Raval; Madhvi Joshi; Neeta Khandelwal; Nitesh Shah; Nitin Savaliya; Nitin Shukla; Ramesh Pandit; Sonal Sharma; Twinkle Soni; Umang Mishra; Zarna Patel; Zuber Saiyed                                                                                                                                                                                                                                                                                                                                  |
| EPI_ISL_3844263, EPI_ISL_3844393, EPI_ISL_3844497                                                                                                                                                                                                                              | VRDL, Government Medical College Surat (GMC)                                   | Gujarat Biotechnology Research Centre                               | Arpit Shukla; Bhadreshsinh Gohil; Chaitanya Joshi; Dinesh Kumar; Janvi Raval; Madhvi Joshi; Neeta Khandelwal; Nimesh Patel; Nitin Shukla; Ramesh Pandit; Zarna Patel                                                                                                                                                                                                                                                                                                                                                                       |
| EPI_ISL_3844265, EPI_ISL_3844268                                                                                                                                                                                                                                               | VRDL, Government Medical College Surat (SMIMER)                                | Gujarat Biotechnology Research Centre                               | Arpit Shukla; Bhadreshsinh Gohil; Chaitanya Joshi; Dinesh Kumar; Janvi Raval; Madhvi Joshi; Manish Patel; Nimesh Patel; Nitin Shukla; Ramesh Pandit; Zarna Patel                                                                                                                                                                                                                                                                                                                                                                           |
| EPI_ISL_3162110, EPI_ISL_3162111                                                                                                                                                                                                                                               | VRDL, Government Medical College, Surat                                        | Gujarat Biotechnology Research Centre                               | Chaitanya Joshi; Dinesh Kumar; Janvi Raval; Madhvi Joshi; Neeta Khandelwal; Nitesh Shah; Nitin Savaliya; Nitin Shukla; Ramesh Pandit; Sonal Sharma; Twinkle Soni; Umang Mishra; Zarna Patel; Zuber Saiyed                                                                                                                                                                                                                                                                                                                                  |
| EPI_ISL_1662284, EPI_ISL_1663498, EPI_ISL_1663501, EPI_ISL_1663502                                                                                                                                                                                                             | Veer Surendra Sai Institute of Medical Sciences and Research, Burla, Sambalpur | Institute of Life Sciences - INSACOG                                | Ajay Parida; Amol M. Kanampalliwar; Arup Ghosh; Atimukta Jha; INSACOG Consortium; Punit Prasad; Rajeeb Swain; Rupesh Dash; Safal Wallia; Shifu Aggarwal; Sunil K. Raghav                                                                                                                                                                                                                                                                                                                                                                   |
