# Supplementary material for: SARS-COV-2 δ variant drives the pandemic in India and Europe via two subvariants
Source: bioRxiv or medRxiv preprint supplement (doi:10.1101/2021.10.16.21265096), 2021-10-20
Supplement: Supplementary file [file media-3.pdf]

We gratefully acknowledge the following Authors from the Originating laboratories responsible for obtaining the specimens, as well as the Submitting laboratories where the genome data were generated and shared via GISAID, on which this research is based.

All Submitters of data may be contacted directly via [www.gisaid.org](http://www.gisaid.org)

Authors are sorted alphabetically.

| Accession ID                                                                                                                                                                                                                                                                                                                                                                                                                                                                                                                                                                                                                                                                                                                                                                                                                                                                                                                                                                                                                                               | Originating Laboratory                                                                          | Submitting Laboratory                                         | Authors                                                                                                                                                                                                                                                                                                                                                                                                                                                                                                                                                                                                                                            |
|------------------------------------------------------------------------------------------------------------------------------------------------------------------------------------------------------------------------------------------------------------------------------------------------------------------------------------------------------------------------------------------------------------------------------------------------------------------------------------------------------------------------------------------------------------------------------------------------------------------------------------------------------------------------------------------------------------------------------------------------------------------------------------------------------------------------------------------------------------------------------------------------------------------------------------------------------------------------------------------------------------------------------------------------------------|-------------------------------------------------------------------------------------------------|---------------------------------------------------------------|----------------------------------------------------------------------------------------------------------------------------------------------------------------------------------------------------------------------------------------------------------------------------------------------------------------------------------------------------------------------------------------------------------------------------------------------------------------------------------------------------------------------------------------------------------------------------------------------------------------------------------------------------|
| EPI_ISL_1663507, EPI_ISL_1663516, EPI_ISL_1663523                                                                                                                                                                                                                                                                                                                                                                                                                                                                                                                                                                                                                                                                                                                                                                                                                                                                                                                                                                                                          | AIIMS, Patna                                                                                    | Institute of Life Sciences - INSACOG                          | Ajay Parida; Amol M. Kanampalliwar; Arup Ghosh; Atimukta Jha; INSACOG Consortium; Punit Prasad; Rajeeb Swain; Rupesh Dash; Safal Wallia; Shifu Aggarwal; Sunil K. Raghav                                                                                                                                                                                                                                                                                                                                                                                                                                                                           |
| EPI_ISL_2231794                                                                                                                                                                                                                                                                                                                                                                                                                                                                                                                                                                                                                                                                                                                                                                                                                                                                                                                                                                                                                                            | AP SSO                                                                                          | CSIR-Centre for Cellular and Molecular Biology-INSACOG        | Amareshwar Vodapalli; Ara Sreenivas; Archana Bharadwaj Siva; B Himasri; Blessy B John; Divya Tej Sowpati; Karthik Bharadwaj Tallapaka; Lamuk Zaveri; Payel Mukherjee; Rakesh K Mishra; Sharath Chandra Thota; Shreekant Verma; Sofia Banu; Tulasi Nagabandi; Valli Nagalakshmi Undamata; Viswagithe S L                                                                                                                                                                                                                                                                                                                                            |
| EPI_ISL_2484895, EPI_ISL_2484897, EPI_ISL_2484898                                                                                                                                                                                                                                                                                                                                                                                                                                                                                                                                                                                                                                                                                                                                                                                                                                                                                                                                                                                                          | Amdavad Municipal Corporation, Ahmedabad                                                        | Gujarat Biotechnology Research Centre                         | Chaitanya Joshi; Dalip Singh Rathore; Dinesh Kumar; Hiren Mandalia; Madhvi Joshi; Manish Kumar; Nitin Savaliya; Ramesh Pandit; Sonal Sharma; Twinkle Soni                                                                                                                                                                                                                                                                                                                                                                                                                                                                                          |
| EPI_ISL_4127507, EPI_ISL_4127551, EPI_ISL_4129060, EPI_ISL_4129066                                                                                                                                                                                                                                                                                                                                                                                                                                                                                                                                                                                                                                                                                                                                                                                                                                                                                                                                                                                         | BJMC, Pune                                                                                      | IISER Pune                                                    | Aurnab Ghose; Joy Merwin Monteiro; Krishanpal Karmodiya; Rajesh Karyakarte; Suvarna Joshi                                                                                                                                                                                                                                                                                                                                                                                                                                                                                                                                                          |
| EPI_ISL_1663247                                                                                                                                                                                                                                                                                                                                                                                                                                                                                                                                                                                                                                                                                                                                                                                                                                                                                                                                                                                                                                            | BRLSABVM Government Medical College, Rajnandgaon, Chhattisgarh                                  | Institute of Life Sciences - INSACOG                          | Ajay Parida; Amol M. Kanampalliwar; Arup Ghosh; Atimukta Jha; INSACOG Consortium; Punit Prasad; Rajeeb Swain; Rupesh Dash; Safal Wallia; Shifu Aggarwal; Sunil K. Raghav                                                                                                                                                                                                                                                                                                                                                                                                                                                                           |
| EPI_ISL_2373501, EPI_ISL_2373524, EPI_ISL_2373545                                                                                                                                                                                                                                                                                                                                                                                                                                                                                                                                                                                                                                                                                                                                                                                                                                                                                                                                                                                                          | Banaras Hindu University                                                                        | CSIR-Centre for Cellular and Molecular Biology-INSACOG        | ; Abhay Kumar Yadav; Ajay Kumar Yadav; Amareshwar Vodapalli; Ara Sreenivas; Archana Bharadwaj Siva; Ashish; B Himasri; Blessy B John; Chetan Sahni; Deepa Devadas; Divya Tej Sowpati; Gunjan Rai; Gyaneshwer Chaubey; Jaya Chakraborty; Karthik Bharadwaj Tallapaka; Lamuk Zaveri; Maneesha Upadhyay; Manpreet Kaur; Nitish Kumar Singh; Payel Mukherjee; Priyoneel Basu; Rakesh K Mishra; Royana Singh; Saumya Singh; Saurabh Singh; Shani Vishwakarma; Sharath Chandra Thota; Shivam Tiwari; Shivani Mishra; Shreekant Verma; Sofia Banu; Sulakshmi Prapat Mishra; Tulasi Nagabandi; Umesh Choudhary; Valli Nagalakshmi Undamata; Viswagithe S L |
| EPI_ISL_1970221, EPI_ISL_1970223, EPI_ISL_1970224                                                                                                                                                                                                                                                                                                                                                                                                                                                                                                                                                                                                                                                                                                                                                                                                                                                                                                                                                                                                          | Biotechnology Division, NCDC Delhi                                                              | NCDC Delhi, Biotechnology Division                            | Hema Gogia; Hemlata Lall; Kalaiarasan Ponnusamy; Mahesh S Dhar; Manoj K Singh; Meena Datta; Partha Rakshit; Preeti Madan; Priyanka Singh; Radhakrishnan V. S; Robin Marwal; Sandhya Kabra; Sujet K Singh; Uma Sharma                                                                                                                                                                                                                                                                                                                                                                                                                               |
| EPI_ISL_1663304, EPI_ISL_1663307, EPI_ISL_1663308, EPI_ISL_1663312                                                                                                                                                                                                                                                                                                                                                                                                                                                                                                                                                                                                                                                                                                                                                                                                                                                                                                                                                                                         | CIIMS, Bilaspur, Chhattisgarh                                                                   | Institute of Life Sciences - INSACOG                          | Ajay Parida; Amol M. Kanampalliwar; Arup Ghosh; Atimukta Jha; INSACOG Consortium; Punit Prasad; Rajeeb Swain; Rupesh Dash; Safal Wallia; Shifu Aggarwal; Sunil K. Raghav                                                                                                                                                                                                                                                                                                                                                                                                                                                                           |
| EPI_ISL_1838398                                                                                                                                                                                                                                                                                                                                                                                                                                                                                                                                                                                                                                                                                                                                                                                                                                                                                                                                                                                                                                            | CSIR-Centre for Cellular and Molecular Biology                                                  | CSIR-Centre for Cellular and Molecular Biology-INSACOG        | Amareshwar Vodapalli; Ara Sreenivas; Archana Bharadwaj Siva; B Himasri; Blessy B John; Divya Tej Sowpati; Karthik Bharadwaj Tallapaka; Lamuk Zaveri; Onkar Kulkarni; Payel Mukherjee; Rakesh K Mishra; Sharath Chandra Thota; Shreekant Verma; Sofia Banu; Tulasi Nagabandi; Valli Nagalakshmi Undamata; Viswagithe S L                                                                                                                                                                                                                                                                                                                            |
| EPI_ISL_1916411, EPI_ISL_1916417, EPI_ISL_1916454, EPI_ISL_1916465, EPI_ISL_1916475, EPI_ISL_1916486                                                                                                                                                                                                                                                                                                                                                                                                                                                                                                                                                                                                                                                                                                                                                                                                                                                                                                                                                       | CSIR-National Environmental Engineering Research Institute                                      | CSIR-Centre for Cellular and Molecular Biology - INSACOG      | Amareshwar Vodapalli; Ara Sreenivas; B Himasri; Divya Tej Sowpati; Karthik Bharadwaj Tallapaka; Krishna Khairnar; Lamuk Zaveri; Onkar Kulkarni; Rakesh K Mishra; Sharath Chandra Thota; Shreekant Verma; Sofia Banu; Viswagithe S L                                                                                                                                                                                                                                                                                                                                                                                                                |
| EPI_ISL_2441372, EPI_ISL_2441385, EPI_ISL_2441386                                                                                                                                                                                                                                                                                                                                                                                                                                                                                                                                                                                                                                                                                                                                                                                                                                                                                                                                                                                                          | CSIR-National Environmental Engineering Research Institute                                      | CSIR-Centre for Cellular and Molecular Biology-INSACOG        | Amareshwar Vodapalli; Ara Sreenivas; Archana Bharadwaj Siva; B Himasri; Divya Tej Sowpati; Karthik Bharadwaj Tallapaka; Krishna Khairnar; Lamuk Zaveri; Onkar Kulkarni; Payel Mukherjee; Priya Nurkurthy; Rakesh K Mishra; Shreekant Verma; Sofia Banu; Sumedha Avadhanula; Tulasi Nagabandi; Valli Nagalakshmi Undamata; Vidhyadhari Methuku                                                                                                                                                                                                                                                                                                      |
| EPI_ISL_3006894                                                                                                                                                                                                                                                                                                                                                                                                                                                                                                                                                                                                                                                                                                                                                                                                                                                                                                                                                                                                                                            | Chhattisgarh Institute of Medical Sciences (CIMS), Bilaspur                                     | Institute of Life Sciences - INSACOG                          | Ajay Parida; Amol M. Kanampalliwar; Arup Ghosh; Atimukta Jha; INSACOG Consortium; Omprakash Shiriwasi; Punit Prasad; Rajeeb Swain; Rupesh Dash; Safal Wallia; Sana Fatma; Shifu Aggarwal; Sunil K. Raghav                                                                                                                                                                                                                                                                                                                                                                                                                                          |
| EPI_ISL_3276964, EPI_ISL_3277085, EPI_ISL_3277087                                                                                                                                                                                                                                                                                                                                                                                                                                                                                                                                                                                                                                                                                                                                                                                                                                                                                                                                                                                                          | Clinical Virology Laboratory, Institute of Liver and Biliary Sciences                           | ILBS                                                          | Amit Pandey; Chhagan Bihari Sharma; Diptanu Paul; Ekta Gupta; Reshu Agarwal; Shiv Kumar Sarin; Varun Suroliya                                                                                                                                                                                                                                                                                                                                                                                                                                                                                                                                      |
| EPI_ISL_1662291                                                                                                                                                                                                                                                                                                                                                                                                                                                                                                                                                                                                                                                                                                                                                                                                                                                                                                                                                                                                                                            | Dept. Of Microbiology, Lt.. Baliram Kashyap Memorial Govt. Medical college, Dimrapal, Jagdalpur | Institute of Life Sciences - INSACOG                          | Ajay Parida; Amol M. Kanampalliwar; Arup Ghosh; Atimukta Jha; INSACOG Consortium; Punit Prasad; Rajeeb Swain; Rupesh Dash; Safal Wallia; Shifu Aggarwal; Sunil K. Raghav                                                                                                                                                                                                                                                                                                                                                                                                                                                                           |
| EPI_ISL_2379462, EPI_ISL_2379496, EPI_ISL_2379497, EPI_ISL_2379498, EPI_ISL_2379564                                                                                                                                                                                                                                                                                                                                                                                                                                                                                                                                                                                                                                                                                                                                                                                                                                                                                                                                                                        | Dr S Raju, Director of Public Health and Preventive Medicine                                    | inStem NCBS - INSACOG                                         | Uma Ramakrishnan Dasaradhi Palakodeti Aswin SaiNarain                                                                                                                                                                                                                                                                                                                                                                                                                                                                                                                                                                                              |
| EPI_ISL_2521821, EPI_ISL_2521940, EPI_ISL_2521941, EPI_ISL_2521942, EPI_ISL_2521943                                                                                                                                                                                                                                                                                                                                                                                                                                                                                                                                                                                                                                                                                                                                                                                                                                                                                                                                                                        | Dr S raju, Director of public heath and preventive medicine                                     | inStem NCBS - INSACOG                                         | Uma Ramakrishnan Dasaradhi Palakodeti Aswin SaiNarain                                                                                                                                                                                                                                                                                                                                                                                                                                                                                                                                                                                              |
| EPI_ISL_2723830, EPI_ISL_2723922, EPI_ISL_2723924, EPI_ISL_2723925, EPI_ISL_2723927, EPI_ISL_2723976                                                                                                                                                                                                                                                                                                                                                                                                                                                                                                                                                                                                                                                                                                                                                                                                                                                                                                                                                       | Dr S raju, Director of public heath and preventive medicine                                     | inStem NCBS - INSACOG                                         | Uma Ramakrishnan Dasaradhi Palakodeti Aswin SaiNarain                                                                                                                                                                                                                                                                                                                                                                                                                                                                                                                                                                                              |
| EPI_ISL_1940019                                                                                                                                                                                                                                                                                                                                                                                                                                                                                                                                                                                                                                                                                                                                                                                                                                                                                                                                                                                                                                            | GOVIMDRAJ NAGAR                                                                                 | inStem NCBS - INSACOG                                         | Uma Ramakrishnan Dasaradhi Palakodeti Aswin SaiNarain                                                                                                                                                                                                                                                                                                                                                                                                                                                                                                                                                                                              |
| EPI_ISL_1940003, EPI_ISL_1940008, EPI_ISL_1940011, EPI_ISL_1940013, EPI_ISL_1940014, EPI_ISL_1940015                                                                                                                                                                                                                                                                                                                                                                                                                                                                                                                                                                                                                                                                                                                                                                                                                                                                                                                                                       | HOSAHALLI                                                                                       | inStem NCBS - INSACOG                                         | Uma Ramakrishnan Dasaradhi Palakodeti Aswin SaiNarain                                                                                                                                                                                                                                                                                                                                                                                                                                                                                                                                                                                              |
| EPI_ISL_2530319                                                                                                                                                                                                                                                                                                                                                                                                                                                                                                                                                                                                                                                                                                                                                                                                                                                                                                                                                                                                                                            | Hematopathology Laboratory, ACTREC, TMC                                                         | Hematopathology Laboratory, ACTREC, TMC                       | ACTREC; Hematopathology Laboratory                                                                                                                                                                                                                                                                                                                                                                                                                                                                                                                                                                                                                 |
| EPI_ISL_2189726, EPI_ISL_2189770                                                                                                                                                                                                                                                                                                                                                                                                                                                                                                                                                                                                                                                                                                                                                                                                                                                                                                                                                                                                                           | ICMR-National Institute of Virology                                                             | NCDC Delhi, Biotechnology Division                            | A Walimbe; A.Awhale; A.Titkare; B.Apoorva; G.Divekar; H.Kengale; Hema Gogia; Hemlata Lall; K P.Shinde; K.Iyengar; K.Korabu; Kalaiarasan Ponnusamy; M L Choudhary; M.Das; Mahesh S Dhar; Manoj K Singh; Meena Datta; Partha Rakshit; Preeti Madan; Priyanka Singh; R.Verma; Radhakrishnan V. S; Robin Marwal; S Jadhav; S.Bhorekar; S.Jadhav; S.Shelkande; Sandhya Kabra; Sujet K Singh; T.Sanjeevi; U.Saha; Uma Sharma; V Malik; V.Autude; V.Vipat; Z. Sayyed                                                                                                                                                                                      |
| EPI_ISL_1703662, EPI_ISL_1703668, EPI_ISL_1703740, EPI_ISL_1703878, EPI_ISL_1704234, EPI_ISL_1704561, EPI_ISL_1704605, EPI_ISL_1704617, EPI_ISL_1704618, EPI_ISL_1704620, EPI_ISL_1704625, EPI_ISL_1704626, EPI_ISL_1704627, EPI_ISL_1704628, EPI_ISL_1704629, EPI_ISL_1704630, EPI_ISL_1704632, EPI_ISL_1704634, EPI_ISL_1704635, EPI_ISL_1704636, EPI_ISL_1704637, EPI_ISL_1704638, EPI_ISL_1704639, EPI_ISL_1841317, EPI_ISL_1841318, EPI_ISL_1841355, EPI_ISL_1841365, EPI_ISL_1841382, EPI_ISL_1841383, EPI_ISL_1841387, EPI_ISL_1928407, EPI_ISL_1928407, EPI_ISL_2131509, EPI_ISL_2546013, EPI_ISL_2546023, EPI_ISL_2546034, EPI_ISL_2546053, EPI_ISL_2546063, EPI_ISL_2546068, EPI_ISL_2546078, EPI_ISL_2546085, EPI_ISL_2546089, EPI_ISL_2546099, EPI_ISL_2546102, EPI_ISL_2546104, EPI_ISL_2546106, EPI_ISL_2546107, EPI_ISL_2546122, EPI_ISL_2546136, EPI_ISL_2546145, EPI_ISL_2546154, EPI_ISL_2546156, EPI_ISL_2546157, EPI_ISL_2546158, EPI_ISL_2546164, EPI_ISL_2546187, EPI_ISL_2546294, EPI_ISL_2965870, EPI_ISL_3532947, EPI_ISL_3532948 | ICMR-National Institute of Virology - INSACOG                                                   | NIV Influenza                                                 | Dr. Varsha Potdar; Dr. Varsha Potdar and NIC Team                                                                                                                                                                                                                                                                                                                                                                                                                                                                                                                                                                                                  |
| EPI_ISL_2878570, EPI_ISL_2878571, EPI_ISL_2878573, EPI_ISL_2878574, EPI_ISL_2878575, EPI_ISL_2878576, EPI_ISL_2878577, EPI_ISL_2878578, EPI_ISL_2878579, EPI_ISL_2878580, EPI_ISL_2878730, EPI_ISL_2878743, EPI_ISL_2878796, EPI_ISL_2878804, EPI_ISL_2878824, EPI_ISL_2878830, EPI_ISL_2878837, EPI_ISL_2878867, EPI_ISL_2878876, EPI_ISL_2878878, EPI_ISL_2878885, EPI_ISL_2878887, EPI_ISL_2878889, EPI_ISL_2878902, EPI_ISL_2878904, EPI_ISL_2878906, EPI_ISL_2878907, EPI_ISL_2878924, EPI_ISL_2878925, EPI_ISL_2878931, EPI_ISL_2878932, EPI_ISL_2878943, EPI_ISL_2878959, EPI_ISL_2878961, EPI_ISL_2878962, EPI_ISL_2878968, EPI_ISL_2880930, EPI_ISL_2881449, EPI_ISL_2881450, EPI_ISL_2881451, EPI_ISL_2881513, EPI_ISL_2881514                                                                                                                                                                                                                                                                                                                   | INSACOG Surveillance                                                                            | INSACOG at CSIR Institute of Genomics and Integrative Biology | INSACOG                                                                                                                                                                                                                                                                                                                                                                                                                                                                                                                                                                                                                                            |
| EPI_ISL_2877817, EPI_ISL_2877818, EPI_ISL_2877819, EPI_ISL_2877820, EPI_ISL_2877821, EPI_ISL_2877822, EPI_ISL_2877823, EPI_ISL_2877824, EPI_ISL_2877825, EPI_ISL_2877826, EPI_ISL_2877827, EPI_ISL_2877828, EPI_ISL_2877829                                                                                                                                                                                                                                                                                                                                                                                                                                                                                                                                                                                                                                                                                                                                                                                                                                | INSACOG-Assam                                                                                   | National Institute of Biomedical Genomics - INSACOG           | Ajanta Sharma; Arindam Maitra; Kailash Chamuah; Lahari Saikia; Nidhan Kumar Biswas; Saumitra Das; Sreedhar Chinnaswamy                                                                                                                                                                                                                                                                                                                                                                                                                                                                                                                             |
| EPI_ISL_2521601, EPI_ISL_2521605, EPI_ISL_2521606, EPI_ISL_2521609                                                                                                                                                                                                                                                                                                                                                                                                                                                                                                                                                                                                                                                                                                                                                                                                                                                                                                                                                                                         | INSACOG-Mizoram                                                                                 | National Institute of Biomedical Genomics - INSACOG           | Arindam Maitra; Gracy Laldinmawii; N Senthil Kumar; Nidhan Kumar Biswas; Saumitra Das; Sreedhar Chinnaswamy; Swagnik Roy                                                                                                                                                                                                                                                                                                                                                                                                                                                                                                                           |
| EPI_ISL_1419152, EPI_ISL_1589674, EPI_ISL_1589690, EPI_ISL_1589718                                                                                                                                                                                                                                                                                                                                                                                                                                                                                                                                                                                                                                                                                                                                                                                                                                                                                                                                                                                         | INSACOG-WB                                                                                      | National Institute of Biomedical Genomics - INSACOG           | Ajay Chakraborti; Arindam Maitra; Bhaswati Bandyopadhyay; Nidhan Kumar Biswas; Saumitra Das; Sreedhar Chinnaswamy; Tamal Ghosh                                                                                                                                                                                                                                                                                                                                                                                                                                                                                                                     |
| EPI_ISL_1662451                                                                                                                                                                                                                                                                                                                                                                                                                                                                                                                                                                                                                                                                                                                                                                                                                                                                                                                                                                                                                                            | Immunogenomics lab, Institute of Life Sciences, Bhubaneswar                                     | Institute of Life Sciences - INSACOG                          | Ajay Parida; Amol M. Kanampalliwar; Arup Ghosh; Atimukta Jha; INSACOG Consortium; Punit Prasad; Rajeeb Swain; Rupesh Dash; Safal Wallia; Shifu Aggarwal; Sunil K. Raghav                                                                                                                                                                                                                                                                                                                                                                                                                                                                           |
| EPI_ISL_3135898, EPI_ISL_3135900, EPI_ISL_3135901, EPI_ISL_3135902, EPI_ISL_3135903, EPI_ISL_3135904, EPI_ISL_3135925, EPI_ISL_3135927, EPI_ISL_3135928                                                                                                                                                                                                                                                                                                                                                                                                                                                                                                                                                                                                                                                                                                                                                                                                                                                                                                    | Laboratory Medicine and Molecular Diagnostics                                                   | Laboratory Medicine and Molecular Diagnostics                 | Dayakar Seetha; Heera R Pillai; Radhakrishna R Nair; Radhakrishnan R Nair; Sanughosh Kalpothodi                                                                                                                                                                                                                                                                                                                                                                                                                                                                                                                                                    |
| EPI_ISL_1663543, EPI_ISL_1663548, EPI_ISL_1663549                                                                                                                                                                                                                                                                                                                                                                                                                                                                                                                                                                                                                                                                                                                                                                                                                                                                                                                                                                                                          | MGM Medical College, Jamshedpur                                                                 | Institute of Life Sciences - INSACOG                          | Ajay Parida; Amol M. Kanampalliwar; Arup Ghosh; Atimukta Jha; INSACOG Consortium; Punit Prasad; Rajeeb Swain; Rupesh Dash; Safal Wallia; Shifu Aggarwal; Sunil K. Raghav                                                                                                                                                                                                                                                                                                                                                                                                                                                                           |
| EPI_ISL_2157019, EPI_ISL_2157021                                                                                                                                                                                                                                                                                                                                                                                                                                                                                                                                                                                                                                                                                                                                                                                                                                                                                                                                                                                                                           | Mapmygenome                                                                                     | CSIR-Centre for Cellular and Molecular Biology-INSACOG        | Amareshwar Vodapalli; Ara Sreenivas; Archana Bharadwaj Siva; B Himasri; Blessy B John; Divya Tej Sowpati; Karthik Bharadwaj Tallapaka; Lamuk Zaveri; Payel Mukherjee; Rakesh K Mishra; Sharath Chandra Thota; Shreekant Verma; Sofia Banu; Tulasi Nagabandi; Valli Nagalakshmi Undamata; Viswagithe S L                                                                                                                                                                                                                                                                                                                                            |
| EPI_ISL_1663366, EPI_ISL_1663367, EPI_ISL_1663375, EPI_ISL_1663376                                                                                                                                                                                                                                                                                                                                                                                                                                                                                                                                                                                                                                                                                                                                                                                                                                                                                                                                                                                         | NCCS, Pune                                                                                      | Institute of Life Sciences - INSACOG                          | Ajay Parida; Amol M. Kanampalliwar; Arup Ghosh; Atimukta Jha; INSACOG Consortium; Punit Prasad; Rajeeb Swain; Rupesh Dash; Safal Wallia; Shifu Aggarwal; Sunil K. Raghav                                                                                                                                                                                                                                                                                                                                                                                                                                                                           |
| EPI_ISL_2842129                                                                                                                                                                                                                                                                                                                                                                                                                                                                                                                                                                                                                                                                                                                                                                                                                                                                                                                                                                                                                                            | NIMHANS                                                                                         | INSACOG-KA, NIMHANS                                           | Ananthapadmanabha Kotambail; Anita S Desai; Anson Kunjunom George; Chetan G K; Chitra Pattabiraman; Darshan Sreenivas; Ellango Ramasamy; Gautham Arunachal Udipi; Mahesh Kumar.C.S; Sony Sharma; V Ravi                                                                                                                                                                                                                                                                                                                                                                                                                                            |
| EPI_ISL_1939986                                                                                                                                                                                                                                                                                                                                                                                                                                                                                                                                                                                                                                                                                                                                                                                                                                                                                                                                                                                                                                            | NIMHANS                                                                                         | inStem NCBS - INSACOG                                         | Uma Ramakrishnan Dasaradhi Palakodeti Aswin SaiNarain                                                                                                                                                                                                                                                                                                                                                                                                                                                                                                                                                                                              |

|                                                                                                                                                                                                                                                                                                                                                                                                                                                                                                                                                                |                                                                                |                                                                          |                                                                                                                                                                                                                                                                                                                                                                                                                                                                                                                                             |                                                                                                                                                                                                                       |
|----------------------------------------------------------------------------------------------------------------------------------------------------------------------------------------------------------------------------------------------------------------------------------------------------------------------------------------------------------------------------------------------------------------------------------------------------------------------------------------------------------------------------------------------------------------|--------------------------------------------------------------------------------|--------------------------------------------------------------------------|---------------------------------------------------------------------------------------------------------------------------------------------------------------------------------------------------------------------------------------------------------------------------------------------------------------------------------------------------------------------------------------------------------------------------------------------------------------------------------------------------------------------------------------------|-----------------------------------------------------------------------------------------------------------------------------------------------------------------------------------------------------------------------|
| EPI_ISL_1544014, EPI_ISL_2162392, EPI_ISL_2162393, EPI_ISL_2162395, EPI_ISL_2162411                                                                                                                                                                                                                                                                                                                                                                                                                                                                            | National Centre For Cell Science                                               | National Centre For Cell Science - INSACOG                               | Ajay Pillai; Dhiraj Paul; INSACOG Consortium team; Manoj Kumar Bhat; Mitali Inamdar; Mohak P Gujare; Shivang P. Bhanushali; Sonal Manik Chavan; Yogesh Shouche                                                                                                                                                                                                                                                                                                                                                                              |                                                                                                                                                                                                                       |
| EPI_ISL_2107027, EPI_ISL_2107070                                                                                                                                                                                                                                                                                                                                                                                                                                                                                                                               | National Centre For Cell Science - INSACOG                                     | National Centre For Cell Science                                         | Ajay Pillai; Dhiraj Paul; INSACOG Consortium team; Manoj Kumar Bhat; Mitali Inamdar; Mohak P Gujare; Shivang P. Bhanushali; Yogesh Shouche                                                                                                                                                                                                                                                                                                                                                                                                  |                                                                                                                                                                                                                       |
| EPI_ISL_2460533, EPI_ISL_2460547, EPI_ISL_2460550, EPI_ISL_2460627, EPI_ISL_2460681, EPI_ISL_2461256, EPI_ISL_2461258, EPI_ISL_2461509, EPI_ISL_2461515, EPI_ISL_2461539, EPI_ISL_2461564, EPI_ISL_2461781, EPI_ISL_2461788, EPI_ISL_2461789, EPI_ISL_2461822, EPI_ISL_2504284, EPI_ISL_2504861, EPI_ISL_2555827, EPI_ISL_2556187, EPI_ISL_2556200, EPI_ISL_2556447, EPI_ISL_2556524, EPI_ISL_2556527, EPI_ISL_2556583                                                                                                                                         | see above                                                                      | National Centre for Disease Control (NCDC) Biotechnology Division, Delhi | NCDC Delhi, Biotechnology Division INSACOG                                                                                                                                                                                                                                                                                                                                                                                                                                                                                                  | Hema Gogia; Hemlata Lali; Kalaiarasan Ponnusamy; Mahesh S Dhar; Manoj K Singh; Meena Datta; Partha Rakshit; Preeti Madan; Priyanka Singh; Radhakrishnan V. S; Robin Marwal; Sandhya Kabra; Sujeet K Singh; Uma Sharma |
| EPI_ISL_4104000                                                                                                                                                                                                                                                                                                                                                                                                                                                                                                                                                | Pandit Raghunath Murmu Medical College, Baripada                               | Institute of Life Sciences-INSACOG                                       | Ajay Parida; Amol M. Kanampalliwar; Arup Ghosh; Atimukta Jha; INSACOG Consortium; Punit Prasad; Rajeeb Swain; Rupesh Dash; Safal Wallia; Sana Fatma; Shifu Aggarwal; Sunil K. Raghav                                                                                                                                                                                                                                                                                                                                                        |                                                                                                                                                                                                                       |
| EPI_ISL_2341693, EPI_ISL_2341708, EPI_ISL_2341709, EPI_ISL_2341862, EPI_ISL_2341863, EPI_ISL_2341864, EPI_ISL_2341866, EPI_ISL_2341867, EPI_ISL_2341869, EPI_ISL_2341871, EPI_ISL_2341872, EPI_ISL_2341875, EPI_ISL_2341876, EPI_ISL_2341880, EPI_ISL_2341881, EPI_ISL_2341883, EPI_ISL_2341885, EPI_ISL_2341887, EPI_ISL_2341889, EPI_ISL_2341890, EPI_ISL_2341891, EPI_ISL_2341892, EPI_ISL_2341896, EPI_ISL_2341897, EPI_ISL_2341898, EPI_ISL_2341899, EPI_ISL_2341900, EPI_ISL_2341901, EPI_ISL_2341902, EPI_ISL_2341904, EPI_ISL_2341912, EPI_ISL_2341914 | see above                                                                      | Pt. Jawahar Lal Nehru Memorial Medical College, Raipur                   | Institute of Life Sciences - INSACOG                                                                                                                                                                                                                                                                                                                                                                                                                                                                                                        | Ajay Parida; Amol M. Kanampalliwar; Arup Ghosh; Atimukta Jha; INSACOG Consortium; Omprakash Shiriwas; Punit Prasad; Rajeeb Swain; Rupesh Dash; Safal Wallia; Sana Fatma; Shifu Aggarwal; Sunil K. Raghav              |
| EPI_ISL_3453376                                                                                                                                                                                                                                                                                                                                                                                                                                                                                                                                                | RUHS College of Medical Sciences                                               | CSIR-Centre for Cellular and Molecular Biology - INSACOG                 | Amareshwar Vodapalli; Ara Sreenivas; Archana Bharadwaj Siva; B Himasri; Divya Tej Sowpati; Dr. Gaurav Dalela; Dr. Jitendra Panda; Dr. Nilofer Khayyam; Dr. Raja Babu Panwar; Dr. Rajeev Gupta; Dr. Ramesh Sharma; Dr. Sonali Sharma; Dr. Sudhanshu Kacker; Dr. Vaseem Naheed Baig; Jandhyala Sai Krishna; Karthik Bharadwaj Tallapaka; Lamuk Zaveri; Onkar Kulkarni; Payel Mukherjee; Priya Nurkurthy; Rakesh K Mishra; Shreekant Verma; Sofia Banu; Sumedha Avadhanula; Tulasi Nagabandi; Valli Nagalakshmi Undamatla; Vidhyadhari Methuku |                                                                                                                                                                                                                       |
| EPI_ISL_4104093                                                                                                                                                                                                                                                                                                                                                                                                                                                                                                                                                | Rajendra Memorial Research Institute of Medical Sciences                       | Institute of Life Sciences-INSACOG                                       | Ajay Parida; Amol M. Kanampalliwar; Arup Ghosh; Atimukta Jha; INSACOG Consortium; Punit Prasad; Rajeeb Swain; Rupesh Dash; Safal Wallia; Sana Fatma; Shifu Aggarwal; Sunil K. Raghav                                                                                                                                                                                                                                                                                                                                                        |                                                                                                                                                                                                                       |
| EPI_ISL_2341853, EPI_ISL_2341855, EPI_ISL_2341856, EPI_ISL_1939974                                                                                                                                                                                                                                                                                                                                                                                                                                                                                             | S.C.B. Medical College and Hospital, Cuttack                                   | Institute of Life Sciences - INSACOG                                     | Ajay Parida; Amol M. Kanampalliwar; Arup Ghosh; Atimukta Jha; INSACOG Consortium; Omprakash Shiriwas; Punit Prasad; Rajeeb Swain; Rupesh Dash; Safal Wallia; Sana Fatma; Shifu Aggarwal; Sunil K. Raghav                                                                                                                                                                                                                                                                                                                                    |                                                                                                                                                                                                                       |
| EPI_ISL_1914584, EPI_ISL_1914591                                                                                                                                                                                                                                                                                                                                                                                                                                                                                                                               | SUBRAMNAYA NAGAR                                                               | inStem NCBS - INSACOG                                                    | Uma Ramakrishnan Dasaradhi Palakodeti Aswin SaiNarain                                                                                                                                                                                                                                                                                                                                                                                                                                                                                       |                                                                                                                                                                                                                       |
| EPI_ISL_1838134, EPI_ISL_1838194, EPI_ISL_3162096                                                                                                                                                                                                                                                                                                                                                                                                                                                                                                              | State Virus Research and Diagnostic Laboratory (VRDL), AIIMS Raipur            | State Virus Research and Diagnostic Laboratory (VRDL), AIIMS Raipur      | Anudita Bhargava; Kuldeep Sharma; Priyanka Singh; Pushpendra Singh; Sanjay Singh Negi; Somya Sharma                                                                                                                                                                                                                                                                                                                                                                                                                                         |                                                                                                                                                                                                                       |
| EPI_ISL_1838134, EPI_ISL_1838151, EPI_ISL_1838194, EPI_ISL_3162096                                                                                                                                                                                                                                                                                                                                                                                                                                                                                             | The National Centre for Cell Science                                           | CSIR-Centre for Cellular and Molecular Biology-INSACOG                   | Ajay Pillai; Amareshwar Vodapalli; Ara Sreenivas; Archana Bharadwaj Siva; B Himasri; Blessy B John; Dhiraj Paul; Divya Tej Sowpati; INSACOG Consortium team; Karthik Bharadwaj Tallapaka; Lamuk Zaveri; Manoj Kumar Bhat; Mitali Inamdar; Mohak P Gujare; Onkar Kulkarni; Payel Mukherjee; Rakesh K Mishra; Sharath Chandra Thota; Shivang P. Bhanushali; Shreekant Verma; Sofia Banu; Sonal Manik Chavan; Tulasi Nagabandi; Valli Nagalakshmi Undamatla; Viswagithe S L; Yogesh Shouche                                                    |                                                                                                                                                                                                                       |
| EPI_ISL_1662284                                                                                                                                                                                                                                                                                                                                                                                                                                                                                                                                                | VRDL, Government Medical College Surat                                         | Gujarat Biotechnology Research Centre                                    | Chaitanya Joshi; Dinesh Kumar; Janvi Raval; Madhvi Joshi; Neeta Khandelwal; Nitesh Shah; Nitin Savaliya; Nitin Shukla; Ramesh Pandit; Sonal Sharma; Twinkle Soni; Umang Mishra; Zarna Patel; Zuber Saiyed                                                                                                                                                                                                                                                                                                                                   |                                                                                                                                                                                                                       |
|                                                                                                                                                                                                                                                                                                                                                                                                                                                                                                                                                                | Veer Surendra Sai Institute of Medical Sciences and Research, Burla, Sambalpur | Institute of Life Sciences - INSACOG                                     | Ajay Parida; Amol M. Kanampalliwar; Arup Ghosh; Atimukta Jha; INSACOG Consortium; Punit Prasad; Rajeeb Swain; Rupesh Dash; Safal Wallia; Shifu Aggarwal; Sunil K. Raghav                                                                                                                                                                                                                                                                                                                                                                    |                                                                                                                                                                                                                       |
