# Supplementary material for: SARS-COV-2 δ variant drives the pandemic in India and Europe via two subvariants
Source: bioRxiv or medRxiv preprint supplement (doi:10.1101/2021.10.16.21265096), 2021-10-20
Supplement: Supplementary file [file media-6.pdf]

see above

SARS-CoV-2 Sequencing Castilla y Leon-Spain Consortium

SARS-CoV-2 Sequencing Castilla y Leon-Spain Consortium

Antonio Orduña-Domingo; Carlos Fuster Foz; Carmen Aldea-Mansilla; Carmen Gimeno Crespo; David Abad; Gabriel March Rosello; Gregoria Megias Lobón; Jose María Eiros Bouza; M. Isabel Fernandez-Natal; Marta Dominguez-Gil; Marta Hernandez; María Antonia García Castro; M<sup>a</sup> Fe Brezmes-Valdivieso; Noelia Arenal Andrés; Silvia Rojo; Sonsoles Garcinuño Pérez

EPI\_ISL\_4391362, EPI\_ISL\_4391368, EPI\_ISL\_4391374, EPI\_ISL\_4391380, EPI\_ISL\_4391382, EPI\_ISL\_4391390, EPI\_ISL\_4391398, EPI\_ISL\_4391399, EPI\_ISL\_4391404, EPI\_ISL\_4391406, EPI\_ISL\_4391411, EPI\_ISL\_4391421, EPI\_ISL\_4391425, EPI\_ISL\_4391427, EPI\_ISL\_4391432, EPI\_ISL\_4391433

see above

Servicio de Microbiología Hospital Ramon y Cajal

Servicio de Microbiología Hospital Ramon y Cajal

Galan JC; Martinez L. Abreu M; Ponce M; y Gonzalez-Alba JM
