# Supplementary material for: SARS-COV-2 δ variant drives the pandemic in India and Europe via two subvariants
Source: bioRxiv or medRxiv preprint supplement (doi:10.1101/2021.10.16.21265096), 2021-10-20
Supplement: Supplementary file [file media-7.pdf]

We gratefully acknowledge the following Authors from the Originating laboratories responsible for obtaining the specimens, as well as the Submitting laboratories where the genome data were generated and shared via GISAID, on which this research is based.

All Submitters of data may be contacted directly via [www.gisaid.org](http://www.gisaid.org)

Authors are sorted alphabetically.

| Accession ID                                                                                                                                                                                                                                                                                                                                                                                                                                                                                                                                                                                                                                                                                                                                                                                                                                                                                                                                                                                                                                                                                                                                                                                                                                                                                                                                                                                                                                                                                                                                                                                                                                                                                                                                                                                                                                                                                                                                                                                                                                                                                                                                                                                                                                                                                                                                                                                                                                                                                                                                                                                                                                                                                                                                                                                                                                                                                                                         | Originating Laboratory                                                                           | Submitting Laboratory                                                                            | Authors                                                                                                                                                                                                                     |
|--------------------------------------------------------------------------------------------------------------------------------------------------------------------------------------------------------------------------------------------------------------------------------------------------------------------------------------------------------------------------------------------------------------------------------------------------------------------------------------------------------------------------------------------------------------------------------------------------------------------------------------------------------------------------------------------------------------------------------------------------------------------------------------------------------------------------------------------------------------------------------------------------------------------------------------------------------------------------------------------------------------------------------------------------------------------------------------------------------------------------------------------------------------------------------------------------------------------------------------------------------------------------------------------------------------------------------------------------------------------------------------------------------------------------------------------------------------------------------------------------------------------------------------------------------------------------------------------------------------------------------------------------------------------------------------------------------------------------------------------------------------------------------------------------------------------------------------------------------------------------------------------------------------------------------------------------------------------------------------------------------------------------------------------------------------------------------------------------------------------------------------------------------------------------------------------------------------------------------------------------------------------------------------------------------------------------------------------------------------------------------------------------------------------------------------------------------------------------------------------------------------------------------------------------------------------------------------------------------------------------------------------------------------------------------------------------------------------------------------------------------------------------------------------------------------------------------------------------------------------------------------------------------------------------------------|--------------------------------------------------------------------------------------------------|--------------------------------------------------------------------------------------------------|-----------------------------------------------------------------------------------------------------------------------------------------------------------------------------------------------------------------------------|
| EPI_ISL_4572088, EPI_ISL_4572089, EPI_ISL_4572220                                                                                                                                                                                                                                                                                                                                                                                                                                                                                                                                                                                                                                                                                                                                                                                                                                                                                                                                                                                                                                                                                                                                                                                                                                                                                                                                                                                                                                                                                                                                                                                                                                                                                                                                                                                                                                                                                                                                                                                                                                                                                                                                                                                                                                                                                                                                                                                                                                                                                                                                                                                                                                                                                                                                                                                                                                                                                    | A.S.L. ALESSANDRIA                                                                               | Fondazione del Piemonte per l'Oncologia IRCCS                                                    | Antonino Sottile; Giorgio Giardina; Paola Marino; Silvia Brossa                                                                                                                                                             |
| EPI_ISL_4256376, EPI_ISL_4256377, EPI_ISL_4256378, EPI_ISL_4256379, EPI_ISL_4256380, EPI_ISL_4256381, EPI_ISL_4256382, EPI_ISL_4256383, EPI_ISL_4256386, EPI_ISL_4256387, EPI_ISL_4436498, EPI_ISL_4436502, EPI_ISL_4436503, EPI_ISL_4436505, EPI_ISL_4572051, EPI_ISL_4572052, EPI_ISL_4572053, EPI_ISL_4572054, EPI_ISL_4572055, EPI_ISL_4572056, EPI_ISL_4572122, EPI_ISL_4572125, EPI_ISL_4572126                                                                                                                                                                                                                                                                                                                                                                                                                                                                                                                                                                                                                                                                                                                                                                                                                                                                                                                                                                                                                                                                                                                                                                                                                                                                                                                                                                                                                                                                                                                                                                                                                                                                                                                                                                                                                                                                                                                                                                                                                                                                                                                                                                                                                                                                                                                                                                                                                                                                                                                                | A.S.L. ASTI                                                                                      | Fondazione del Piemonte per l'Oncologia IRCCS                                                    | Antonino Sottile; Giorgio Giardina; Paola Marino; Silvia Brossa                                                                                                                                                             |
| see above                                                                                                                                                                                                                                                                                                                                                                                                                                                                                                                                                                                                                                                                                                                                                                                                                                                                                                                                                                                                                                                                                                                                                                                                                                                                                                                                                                                                                                                                                                                                                                                                                                                                                                                                                                                                                                                                                                                                                                                                                                                                                                                                                                                                                                                                                                                                                                                                                                                                                                                                                                                                                                                                                                                                                                                                                                                                                                                            | A.S.L. ASTI                                                                                      | Fondazione del Piemonte per l'Oncologia IRCCS                                                    | Antonino Sottile; Giorgio Giardina; Paola Marino; Silvia Brossa                                                                                                                                                             |
| EPI_ISL_4436487, EPI_ISL_4436488, EPI_ISL_4436489, EPI_ISL_4436491, EPI_ISL_4436492, EPI_ISL_4436493, EPI_ISL_4436494, EPI_ISL_4436495, EPI_ISL_4436496, EPI_ISL_4436497, EPI_ISL_4436499, EPI_ISL_4436500, EPI_ISL_4436501, EPI_ISL_4436504, EPI_ISL_4436505, EPI_ISL_4436506, EPI_ISL_4436507, EPI_ISL_4436508, EPI_ISL_4436509, EPI_ISL_4436510, EPI_ISL_4436511, EPI_ISL_4436512, EPI_ISL_4436513, EPI_ISL_4436514, EPI_ISL_4436515, EPI_ISL_4436516, EPI_ISL_4436517, EPI_ISL_4436518, EPI_ISL_4436519, EPI_ISL_4436520, EPI_ISL_4436521, EPI_ISL_4436524, EPI_ISL_4436528, EPI_ISL_4436529, EPI_ISL_4436530, EPI_ISL_4436531, EPI_ISL_4436532, EPI_ISL_4436533, EPI_ISL_4436534, EPI_ISL_4436535, EPI_ISL_4436536, EPI_ISL_4436537, EPI_ISL_4436538, EPI_ISL_4436539, EPI_ISL_4436540, EPI_ISL_4436541, EPI_ISL_4436542, EPI_ISL_4436543, EPI_ISL_4436544, EPI_ISL_4436545, EPI_ISL_4436547, EPI_ISL_4572066, EPI_ISL_4572067, EPI_ISL_4572069, EPI_ISL_4572070, EPI_ISL_4572071, EPI_ISL_4572072, EPI_ISL_4572074, EPI_ISL_4572075, EPI_ISL_4572076, EPI_ISL_4572077, EPI_ISL_4572078, EPI_ISL_4572079, EPI_ISL_4572080, EPI_ISL_4572081, EPI_ISL_4572082, EPI_ISL_4572083, EPI_ISL_4572084, EPI_ISL_4572085, EPI_ISL_4572086, EPI_ISL_4572087, EPI_ISL_4572089, EPI_ISL_4572091, EPI_ISL_4572092, EPI_ISL_4572093, EPI_ISL_4572094, EPI_ISL_4572095, EPI_ISL_4572096, EPI_ISL_4572097, EPI_ISL_4572098, EPI_ISL_4572099, EPI_ISL_4572100, EPI_ISL_4572101, EPI_ISL_4572102, EPI_ISL_4572104, EPI_ISL_4572105, EPI_ISL_4572106, EPI_ISL_4572107, EPI_ISL_4572108, EPI_ISL_4572109, EPI_ISL_4572110, EPI_ISL_4572111, EPI_ISL_4572112, EPI_ISL_4572113, EPI_ISL_4572114, EPI_ISL_4572115, EPI_ISL_4572116, EPI_ISL_4572117, EPI_ISL_4572118, EPI_ISL_4572119, EPI_ISL_4572121, EPI_ISL_4572122, EPI_ISL_4572123, EPI_ISL_4572124, EPI_ISL_4572125, EPI_ISL_4572126, EPI_ISL_4572127, EPI_ISL_4572128, EPI_ISL_4572129, EPI_ISL_4572130, EPI_ISL_4572131, EPI_ISL_4572132, EPI_ISL_4572133, EPI_ISL_4572134, EPI_ISL_4572135, EPI_ISL_4572136, EPI_ISL_4572137, EPI_ISL_4572138, EPI_ISL_4572139, EPI_ISL_4572140, EPI_ISL_4572141, EPI_ISL_4572142, EPI_ISL_4572143, EPI_ISL_4572144, EPI_ISL_4572145, EPI_ISL_4572146, EPI_ISL_4572148, EPI_ISL_4572149, EPI_ISL_4572150, EPI_ISL_4572200, EPI_ISL_4572201, EPI_ISL_4572202, EPI_ISL_4572203, EPI_ISL_4572204, EPI_ISL_4572205, EPI_ISL_4572206, EPI_ISL_4572207, EPI_ISL_4572208, EPI_ISL_4572209, EPI_ISL_4572210, EPI_ISL_4572211, EPI_ISL_4572212, EPI_ISL_4572213, EPI_ISL_4572214, EPI_ISL_4572215, EPI_ISL_4572216, EPI_ISL_4572217, EPI_ISL_4572218, EPI_ISL_4572219                                                                                                                                                                                                                                                                                                  | A.S.L. CUNEO 1                                                                                   | Fondazione del Piemonte per l'Oncologia IRCCS                                                    | Antonino Sottile; Giorgio Giardina; Paola Marino; Silvia Brossa                                                                                                                                                             |
| EPI_ISL_4572120, EPI_ISL_4572211, EPI_ISL_4572214, EPI_ISL_4572216, EPI_ISL_4572217, EPI_ISL_4572218, EPI_ISL_4572219                                                                                                                                                                                                                                                                                                                                                                                                                                                                                                                                                                                                                                                                                                                                                                                                                                                                                                                                                                                                                                                                                                                                                                                                                                                                                                                                                                                                                                                                                                                                                                                                                                                                                                                                                                                                                                                                                                                                                                                                                                                                                                                                                                                                                                                                                                                                                                                                                                                                                                                                                                                                                                                                                                                                                                                                                | A.S.L. NOVARA                                                                                    | Fondazione del Piemonte per l'Oncologia IRCCS                                                    | Antonino Sottile; Giorgio Giardina; Paola Marino; Silvia Brossa                                                                                                                                                             |
| see above                                                                                                                                                                                                                                                                                                                                                                                                                                                                                                                                                                                                                                                                                                                                                                                                                                                                                                                                                                                                                                                                                                                                                                                                                                                                                                                                                                                                                                                                                                                                                                                                                                                                                                                                                                                                                                                                                                                                                                                                                                                                                                                                                                                                                                                                                                                                                                                                                                                                                                                                                                                                                                                                                                                                                                                                                                                                                                                            | A.S.L. NOVARA                                                                                    | Fondazione del Piemonte per l'Oncologia IRCCS                                                    | Antonino Sottile; Giorgio Giardina; Paola Marino; Silvia Brossa                                                                                                                                                             |
| EPI_ISL_4572057, EPI_ISL_4572058, EPI_ISL_4572059, EPI_ISL_4572060, EPI_ISL_4572061, EPI_ISL_4572062, EPI_ISL_4572063, EPI_ISL_4572114, EPI_ISL_4572115                                                                                                                                                                                                                                                                                                                                                                                                                                                                                                                                                                                                                                                                                                                                                                                                                                                                                                                                                                                                                                                                                                                                                                                                                                                                                                                                                                                                                                                                                                                                                                                                                                                                                                                                                                                                                                                                                                                                                                                                                                                                                                                                                                                                                                                                                                                                                                                                                                                                                                                                                                                                                                                                                                                                                                              | A.S.L. TO3                                                                                       | Fondazione del Piemonte per l'Oncologia IRCCS                                                    | Antonino Sottile; Giorgio Giardina; Paola Marino; Silvia Brossa                                                                                                                                                             |
| see above                                                                                                                                                                                                                                                                                                                                                                                                                                                                                                                                                                                                                                                                                                                                                                                                                                                                                                                                                                                                                                                                                                                                                                                                                                                                                                                                                                                                                                                                                                                                                                                                                                                                                                                                                                                                                                                                                                                                                                                                                                                                                                                                                                                                                                                                                                                                                                                                                                                                                                                                                                                                                                                                                                                                                                                                                                                                                                                            | A.S.L. TO3                                                                                       | Fondazione del Piemonte per l'Oncologia IRCCS                                                    | Antonino Sottile; Giorgio Giardina; Paola Marino; Silvia Brossa                                                                                                                                                             |
| EPI_ISL_4572215                                                                                                                                                                                                                                                                                                                                                                                                                                                                                                                                                                                                                                                                                                                                                                                                                                                                                                                                                                                                                                                                                                                                                                                                                                                                                                                                                                                                                                                                                                                                                                                                                                                                                                                                                                                                                                                                                                                                                                                                                                                                                                                                                                                                                                                                                                                                                                                                                                                                                                                                                                                                                                                                                                                                                                                                                                                                                                                      | A.S.L. TO4                                                                                       | Fondazione del Piemonte per l'Oncologia IRCCS                                                    | Antonino Sottile; Giorgio Giardina; Paola Marino; Silvia Brossa                                                                                                                                                             |
| EPI_ISL_4436522, EPI_ISL_4436523, EPI_ISL_4436525                                                                                                                                                                                                                                                                                                                                                                                                                                                                                                                                                                                                                                                                                                                                                                                                                                                                                                                                                                                                                                                                                                                                                                                                                                                                                                                                                                                                                                                                                                                                                                                                                                                                                                                                                                                                                                                                                                                                                                                                                                                                                                                                                                                                                                                                                                                                                                                                                                                                                                                                                                                                                                                                                                                                                                                                                                                                                    | A.S.L. TO5                                                                                       | Fondazione del Piemonte per l'Oncologia IRCCS                                                    | Antonino Sottile; Giorgio Giardina; Paola Marino; Silvia Brossa                                                                                                                                                             |
| EPI_ISL_4436553, EPI_ISL_4436555, EPI_ISL_4436556, EPI_ISL_4436557, EPI_ISL_4436558, EPI_ISL_4436559, EPI_ISL_4436560, EPI_ISL_4436561, EPI_ISL_4572065, EPI_ISL_4572068, EPI_ISL_4572105, EPI_ISL_4572106, EPI_ISL_4572107, EPI_ISL_4572108, EPI_ISL_4572109, EPI_ISL_4572110, EPI_ISL_4572111, EPI_ISL_4572112, EPI_ISL_4572113                                                                                                                                                                                                                                                                                                                                                                                                                                                                                                                                                                                                                                                                                                                                                                                                                                                                                                                                                                                                                                                                                                                                                                                                                                                                                                                                                                                                                                                                                                                                                                                                                                                                                                                                                                                                                                                                                                                                                                                                                                                                                                                                                                                                                                                                                                                                                                                                                                                                                                                                                                                                    | A.S.L. VERCELLI                                                                                  | Fondazione del Piemonte per l'Oncologia IRCCS                                                    | Antonino Sottile; Giorgio Giardina; Paola Marino; Silvia Brossa                                                                                                                                                             |
| see above                                                                                                                                                                                                                                                                                                                                                                                                                                                                                                                                                                                                                                                                                                                                                                                                                                                                                                                                                                                                                                                                                                                                                                                                                                                                                                                                                                                                                                                                                                                                                                                                                                                                                                                                                                                                                                                                                                                                                                                                                                                                                                                                                                                                                                                                                                                                                                                                                                                                                                                                                                                                                                                                                                                                                                                                                                                                                                                            | A.S.L. VERCELLI                                                                                  | Fondazione del Piemonte per l'Oncologia IRCCS                                                    | Antonino Sottile; Giorgio Giardina; Paola Marino; Silvia Brossa                                                                                                                                                             |
| EPI_ISL_4571178, EPI_ISL_4571179, EPI_ISL_4571180, EPI_ISL_4571181, EPI_ISL_4571182, EPI_ISL_4571183, EPI_ISL_4571184, EPI_ISL_4571185, EPI_ISL_4571186, EPI_ISL_4571187, EPI_ISL_4571188, EPI_ISL_4571189, EPI_ISL_4571190, EPI_ISL_4571191, EPI_ISL_4571192                                                                                                                                                                                                                                                                                                                                                                                                                                                                                                                                                                                                                                                                                                                                                                                                                                                                                                                                                                                                                                                                                                                                                                                                                                                                                                                                                                                                                                                                                                                                                                                                                                                                                                                                                                                                                                                                                                                                                                                                                                                                                                                                                                                                                                                                                                                                                                                                                                                                                                                                                                                                                                                                        | AOPD                                                                                             | Istituto Zooprofilattico Sperimentale delle Venezie                                              | Adelaide Milani; Alessia Schivo; Alice Fusaro; Ambra Pastori; Annalisa Salviato; Antonia Ricci; Calogero Terregino; Edoardo Giussani; Elisa Palumbo; Erika Giorgia Quaranta; Isabella Monne; Luca Tassoni                   |
| see above                                                                                                                                                                                                                                                                                                                                                                                                                                                                                                                                                                                                                                                                                                                                                                                                                                                                                                                                                                                                                                                                                                                                                                                                                                                                                                                                                                                                                                                                                                                                                                                                                                                                                                                                                                                                                                                                                                                                                                                                                                                                                                                                                                                                                                                                                                                                                                                                                                                                                                                                                                                                                                                                                                                                                                                                                                                                                                                            | AOPD                                                                                             | Istituto Zooprofilattico Sperimentale delle Venezie                                              | Adelaide Milani; Alessia Schivo; Alice Fusaro; Ambra Pastori; Annalisa Salviato; Antonia Ricci; Calogero Terregino; Edoardo Giussani; Elisa Palumbo; Erika Giorgia Quaranta; Isabella Monne; Luca Tassoni                   |
| EPI_ISL_4571140, EPI_ISL_4571141, EPI_ISL_4571142, EPI_ISL_4571143, EPI_ISL_4571144                                                                                                                                                                                                                                                                                                                                                                                                                                                                                                                                                                                                                                                                                                                                                                                                                                                                                                                                                                                                                                                                                                                                                                                                                                                                                                                                                                                                                                                                                                                                                                                                                                                                                                                                                                                                                                                                                                                                                                                                                                                                                                                                                                                                                                                                                                                                                                                                                                                                                                                                                                                                                                                                                                                                                                                                                                                  | AOUIVR                                                                                           | Istituto Zooprofilattico Sperimentale delle Venezie                                              | Adelaide Milani; Alessia Schivo; Alice Fusaro; Ambra Pastori; Annalisa Salviato; Antonia Ricci; Calogero Terregino; Edoardo Giussani; Elisa Palumbo; Erika Giorgia Quaranta; Isabella Monne; Luca Tassoni                   |
| EPI_ISL_4524666, EPI_ISL_4525910, EPI_ISL_4527801, EPI_ISL_4527895, EPI_ISL_4550599, EPI_ISL_4550898                                                                                                                                                                                                                                                                                                                                                                                                                                                                                                                                                                                                                                                                                                                                                                                                                                                                                                                                                                                                                                                                                                                                                                                                                                                                                                                                                                                                                                                                                                                                                                                                                                                                                                                                                                                                                                                                                                                                                                                                                                                                                                                                                                                                                                                                                                                                                                                                                                                                                                                                                                                                                                                                                                                                                                                                                                 | ASL BARI                                                                                         | University of Bari Biomedical Sciences and Human Oncology                                        | Adelaide Milani; Alessia Schivo; Alice Fusaro; Ambra Pastori; Annalisa Salviato; Antonia Ricci; Calogero Terregino; Edoardo Giussani; Elisa Palumbo; Erika Giorgia Quaranta; Isabella Monne; Luca Tassoni<br>Maria Chironna |
| EPI_ISL_4683989, EPI_ISL_4685074, EPI_ISL_4685786, EPI_ISL_4686040, EPI_ISL_4686748, EPI_ISL_4687460, EPI_ISL_4688487, EPI_ISL_4690264, EPI_ISL_4692336                                                                                                                                                                                                                                                                                                                                                                                                                                                                                                                                                                                                                                                                                                                                                                                                                                                                                                                                                                                                                                                                                                                                                                                                                                                                                                                                                                                                                                                                                                                                                                                                                                                                                                                                                                                                                                                                                                                                                                                                                                                                                                                                                                                                                                                                                                                                                                                                                                                                                                                                                                                                                                                                                                                                                                              | ASL GENZANO                                                                                      | University Campus Bio-Medico of Rome (UCBM)                                                      | Angeletti S.; Angeletti S.; De Florio L.; Fogolari M.; Francesconi M.; Lintas C.; Riva E.; Veralli R.                                                                                                                       |
| see above                                                                                                                                                                                                                                                                                                                                                                                                                                                                                                                                                                                                                                                                                                                                                                                                                                                                                                                                                                                                                                                                                                                                                                                                                                                                                                                                                                                                                                                                                                                                                                                                                                                                                                                                                                                                                                                                                                                                                                                                                                                                                                                                                                                                                                                                                                                                                                                                                                                                                                                                                                                                                                                                                                                                                                                                                                                                                                                            | ASL GENZANO                                                                                      | University Campus Bio-Medico of Rome (UCBM)                                                      | Angeletti S.; De Florio L.; Fogolari M.; Francesconi M.; Lintas C.; Riva E.; Veralli R.                                                                                                                                     |
| EPI_ISL_4498712                                                                                                                                                                                                                                                                                                                                                                                                                                                                                                                                                                                                                                                                                                                                                                                                                                                                                                                                                                                                                                                                                                                                                                                                                                                                                                                                                                                                                                                                                                                                                                                                                                                                                                                                                                                                                                                                                                                                                                                                                                                                                                                                                                                                                                                                                                                                                                                                                                                                                                                                                                                                                                                                                                                                                                                                                                                                                                                      | ASL Genzano                                                                                      | University Campus Bio-Medico of Rome (UCBM)                                                      | Angeletti S.; De Florio L.; Fogolari M.; Francesconi M.; Lintas C.; Riva E.; University Campus Bio-Medico of Rome (UCBM); Veralli R.                                                                                        |
| EPI_ISL_4498718, EPI_ISL_4498721, EPI_ISL_4498722, EPI_ISL_4498723, EPI_ISL_4498724, EPI_ISL_4498725, EPI_ISL_4498727, EPI_ISL_4498728, EPI_ISL_4498729, EPI_ISL_4546691, EPI_ISL_4546698, EPI_ISL_4546799, EPI_ISL_4546956, EPI_ISL_4547205, EPI_ISL_4547514, EPI_ISL_4547651, EPI_ISL_4547698                                                                                                                                                                                                                                                                                                                                                                                                                                                                                                                                                                                                                                                                                                                                                                                                                                                                                                                                                                                                                                                                                                                                                                                                                                                                                                                                                                                                                                                                                                                                                                                                                                                                                                                                                                                                                                                                                                                                                                                                                                                                                                                                                                                                                                                                                                                                                                                                                                                                                                                                                                                                                                      | ASL genzano                                                                                      | University Campus Bio-Medico of Rome (UCBM)                                                      | Angeletti S.; De Florio L.; Fogolari M.; Francesconi M.; Lintas C.; Riva E.; University Campus Bio-Medico of Rome (UCBM); Veralli R.                                                                                        |
| see above                                                                                                                                                                                                                                                                                                                                                                                                                                                                                                                                                                                                                                                                                                                                                                                                                                                                                                                                                                                                                                                                                                                                                                                                                                                                                                                                                                                                                                                                                                                                                                                                                                                                                                                                                                                                                                                                                                                                                                                                                                                                                                                                                                                                                                                                                                                                                                                                                                                                                                                                                                                                                                                                                                                                                                                                                                                                                                                            | ASL genzano                                                                                      | University Campus Bio-Medico of Rome (UCBM)                                                      | Angeletti S.; De Florio L.; Fogolari M.; Francesconi M.; Lintas C.; Riva E.; Veralli R.                                                                                                                                     |
| EPI_ISL_4498714                                                                                                                                                                                                                                                                                                                                                                                                                                                                                                                                                                                                                                                                                                                                                                                                                                                                                                                                                                                                                                                                                                                                                                                                                                                                                                                                                                                                                                                                                                                                                                                                                                                                                                                                                                                                                                                                                                                                                                                                                                                                                                                                                                                                                                                                                                                                                                                                                                                                                                                                                                                                                                                                                                                                                                                                                                                                                                                      | ASL genzano                                                                                      | University Campus Bio-Medico of Rome (UCBM)                                                      | Angeletti S.; De Florio L.; Fogolari M.; Francesconi M.; Lintas C.; Riva E.; Veralli R.                                                                                                                                     |
| EPI_ISL_4571165, EPI_ISL_4571166, EPI_ISL_4571167, EPI_ISL_4571168, EPI_ISL_4571169, EPI_ISL_4571170, EPI_ISL_4571171, EPI_ISL_4571172, EPI_ISL_4571173, EPI_ISL_4571175, EPI_ISL_4571176                                                                                                                                                                                                                                                                                                                                                                                                                                                                                                                                                                                                                                                                                                                                                                                                                                                                                                                                                                                                                                                                                                                                                                                                                                                                                                                                                                                                                                                                                                                                                                                                                                                                                                                                                                                                                                                                                                                                                                                                                                                                                                                                                                                                                                                                                                                                                                                                                                                                                                                                                                                                                                                                                                                                            | AULSS 2 Marca Trevigiana                                                                         | Istituto Zooprofilattico Sperimentale delle Venezie                                              | Adelaide Milani; Alessia Schivo; Alice Fusaro; Ambra Pastori; Annalisa Salviato; Antonia Ricci; Calogero Terregino; Edoardo Giussani; Elisa Palumbo; Erika Giorgia Quaranta; Isabella Monne; Luca Tassoni                   |
| see above                                                                                                                                                                                                                                                                                                                                                                                                                                                                                                                                                                                                                                                                                                                                                                                                                                                                                                                                                                                                                                                                                                                                                                                                                                                                                                                                                                                                                                                                                                                                                                                                                                                                                                                                                                                                                                                                                                                                                                                                                                                                                                                                                                                                                                                                                                                                                                                                                                                                                                                                                                                                                                                                                                                                                                                                                                                                                                                            | AULSS 2 Marca Trevigiana                                                                         | Istituto Zooprofilattico Sperimentale delle Venezie                                              | Adelaide Milani; Alessia Schivo; Alice Fusaro; Ambra Pastori; Annalisa Salviato; Antonia Ricci; Calogero Terregino; Edoardo Giussani; Elisa Palumbo; Erika Giorgia Quaranta; Isabella Monne; Luca Tassoni                   |
| EPI_ISL_4571122, EPI_ISL_4571123, EPI_ISL_4571124, EPI_ISL_4571125, EPI_ISL_4571126, EPI_ISL_4571127                                                                                                                                                                                                                                                                                                                                                                                                                                                                                                                                                                                                                                                                                                                                                                                                                                                                                                                                                                                                                                                                                                                                                                                                                                                                                                                                                                                                                                                                                                                                                                                                                                                                                                                                                                                                                                                                                                                                                                                                                                                                                                                                                                                                                                                                                                                                                                                                                                                                                                                                                                                                                                                                                                                                                                                                                                 | AULSS 5 Polesana                                                                                 | Istituto Zooprofilattico Sperimentale delle Venezie                                              | Adelaide Milani; Alessia Schivo; Alice Fusaro; Ambra Pastori; Annalisa Salviato; Antonia Ricci; Calogero Terregino; Edoardo Giussani; Elisa Palumbo; Erika Giorgia Quaranta; Isabella Monne; Luca Tassoni                   |
| see above                                                                                                                                                                                                                                                                                                                                                                                                                                                                                                                                                                                                                                                                                                                                                                                                                                                                                                                                                                                                                                                                                                                                                                                                                                                                                                                                                                                                                                                                                                                                                                                                                                                                                                                                                                                                                                                                                                                                                                                                                                                                                                                                                                                                                                                                                                                                                                                                                                                                                                                                                                                                                                                                                                                                                                                                                                                                                                                            | AULSS 5 Polesana                                                                                 | Istituto Zooprofilattico Sperimentale delle Venezie                                              | Adelaide Milani; Alessia Schivo; Alice Fusaro; Ambra Pastori; Annalisa Salviato; Antonia Ricci; Calogero Terregino; Edoardo Giussani; Elisa Palumbo; Erika Giorgia Quaranta; Isabella Monne; Luca Tassoni                   |
| EPI_ISL_4571128, EPI_ISL_4571129, EPI_ISL_4571130, EPI_ISL_4571131, EPI_ISL_4571132, EPI_ISL_4571133, EPI_ISL_4571134, EPI_ISL_4571135, EPI_ISL_4571136, EPI_ISL_4571137, EPI_ISL_4571139                                                                                                                                                                                                                                                                                                                                                                                                                                                                                                                                                                                                                                                                                                                                                                                                                                                                                                                                                                                                                                                                                                                                                                                                                                                                                                                                                                                                                                                                                                                                                                                                                                                                                                                                                                                                                                                                                                                                                                                                                                                                                                                                                                                                                                                                                                                                                                                                                                                                                                                                                                                                                                                                                                                                            | AULSS 6 Euganea                                                                                  | Istituto Zooprofilattico Sperimentale delle Venezie                                              | Adelaide Milani; Alessia Schivo; Alice Fusaro; Ambra Pastori; Annalisa Salviato; Antonia Ricci; Calogero Terregino; Edoardo Giussani; Elisa Palumbo; Erika Giorgia Quaranta; Isabella Monne; Luca Tassoni                   |
| see above                                                                                                                                                                                                                                                                                                                                                                                                                                                                                                                                                                                                                                                                                                                                                                                                                                                                                                                                                                                                                                                                                                                                                                                                                                                                                                                                                                                                                                                                                                                                                                                                                                                                                                                                                                                                                                                                                                                                                                                                                                                                                                                                                                                                                                                                                                                                                                                                                                                                                                                                                                                                                                                                                                                                                                                                                                                                                                                            | AULSS 6 Euganea                                                                                  | Istituto Zooprofilattico Sperimentale delle Venezie                                              | Adelaide Milani; Alessia Schivo; Alice Fusaro; Ambra Pastori; Annalisa Salviato; Antonia Ricci; Calogero Terregino; Edoardo Giussani; Elisa Palumbo; Erika Giorgia Quaranta; Isabella Monne; Luca Tassoni                   |
| EPI_ISL_4571156, EPI_ISL_4571157, EPI_ISL_4571158, EPI_ISL_4571159, EPI_ISL_4571160, EPI_ISL_4571162, EPI_ISL_4571163, EPI_ISL_4571164                                                                                                                                                                                                                                                                                                                                                                                                                                                                                                                                                                                                                                                                                                                                                                                                                                                                                                                                                                                                                                                                                                                                                                                                                                                                                                                                                                                                                                                                                                                                                                                                                                                                                                                                                                                                                                                                                                                                                                                                                                                                                                                                                                                                                                                                                                                                                                                                                                                                                                                                                                                                                                                                                                                                                                                               | AULSS 7 Pedemontana - Bassano                                                                    | Istituto Zooprofilattico Sperimentale delle Venezie                                              | Adelaide Milani; Alessia Schivo; Alice Fusaro; Ambra Pastori; Annalisa Salviato; Antonia Ricci; Calogero Terregino; Edoardo Giussani; Elisa Palumbo; Erika Giorgia Quaranta; Isabella Monne; Luca Tassoni                   |
| see above                                                                                                                                                                                                                                                                                                                                                                                                                                                                                                                                                                                                                                                                                                                                                                                                                                                                                                                                                                                                                                                                                                                                                                                                                                                                                                                                                                                                                                                                                                                                                                                                                                                                                                                                                                                                                                                                                                                                                                                                                                                                                                                                                                                                                                                                                                                                                                                                                                                                                                                                                                                                                                                                                                                                                                                                                                                                                                                            | AULSS 7 Pedemontana - Bassano                                                                    | Istituto Zooprofilattico Sperimentale delle Venezie                                              | Adelaide Milani; Alessia Schivo; Alice Fusaro; Ambra Pastori; Annalisa Salviato; Antonia Ricci; Calogero Terregino; Edoardo Giussani; Elisa Palumbo; Erika Giorgia Quaranta; Isabella Monne; Luca Tassoni                   |
| EPI_ISL_4571146, EPI_ISL_4571152, EPI_ISL_4571154                                                                                                                                                                                                                                                                                                                                                                                                                                                                                                                                                                                                                                                                                                                                                                                                                                                                                                                                                                                                                                                                                                                                                                                                                                                                                                                                                                                                                                                                                                                                                                                                                                                                                                                                                                                                                                                                                                                                                                                                                                                                                                                                                                                                                                                                                                                                                                                                                                                                                                                                                                                                                                                                                                                                                                                                                                                                                    | AULSS 7 Pedemontana - Santorso                                                                   | Istituto Zooprofilattico Sperimentale delle Venezie                                              | Adelaide Milani; Alessia Schivo; Alice Fusaro; Ambra Pastori; Annalisa Salviato; Antonia Ricci; Calogero Terregino; Edoardo Giussani; Elisa Palumbo; Erika Giorgia Quaranta; Isabella Monne; Luca Tassoni                   |
| see above                                                                                                                                                                                                                                                                                                                                                                                                                                                                                                                                                                                                                                                                                                                                                                                                                                                                                                                                                                                                                                                                                                                                                                                                                                                                                                                                                                                                                                                                                                                                                                                                                                                                                                                                                                                                                                                                                                                                                                                                                                                                                                                                                                                                                                                                                                                                                                                                                                                                                                                                                                                                                                                                                                                                                                                                                                                                                                                            | AULSS 7 Pedemontana - Santorso                                                                   | Istituto Zooprofilattico Sperimentale delle Venezie                                              | Adelaide Milani; Alessia Schivo; Alice Fusaro; Ambra Pastori; Annalisa Salviato; Antonia Ricci; Calogero Terregino; Edoardo Giussani; Elisa Palumbo; Erika Giorgia Quaranta; Isabella Monne; Luca Tassoni                   |
| EPI_ISL_4571105, EPI_ISL_4571106, EPI_ISL_4571107, EPI_ISL_4571108, EPI_ISL_4571109, EPI_ISL_4571110, EPI_ISL_4571111, EPI_ISL_4571112, EPI_ISL_4571113, EPI_ISL_4571114, EPI_ISL_4603807                                                                                                                                                                                                                                                                                                                                                                                                                                                                                                                                                                                                                                                                                                                                                                                                                                                                                                                                                                                                                                                                                                                                                                                                                                                                                                                                                                                                                                                                                                                                                                                                                                                                                                                                                                                                                                                                                                                                                                                                                                                                                                                                                                                                                                                                                                                                                                                                                                                                                                                                                                                                                                                                                                                                            | AULSS 9 Scaligera - Legnago                                                                      | Istituto Zooprofilattico Sperimentale delle Venezie                                              | Adelaide Milani; Alessia Schivo; Alice Fusaro; Ambra Pastori; Annalisa Salviato; Antonia Ricci; Calogero Terregino; Edoardo Giussani; Elisa Palumbo; Erika Giorgia Quaranta; Isabella Monne; Luca Tassoni                   |
| see above                                                                                                                                                                                                                                                                                                                                                                                                                                                                                                                                                                                                                                                                                                                                                                                                                                                                                                                                                                                                                                                                                                                                                                                                                                                                                                                                                                                                                                                                                                                                                                                                                                                                                                                                                                                                                                                                                                                                                                                                                                                                                                                                                                                                                                                                                                                                                                                                                                                                                                                                                                                                                                                                                                                                                                                                                                                                                                                            | AULSS 9 Scaligera - Legnago                                                                      | Istituto Zooprofilattico Sperimentale delle Venezie                                              | Adelaide Milani; Alessia Schivo; Alice Fusaro; Ambra Pastori; Annalisa Salviato; Antonia Ricci; Calogero Terregino; Edoardo Giussani; Elisa Palumbo; Erika Giorgia Quaranta; Isabella Monne; Luca Tassoni                   |
| EPI_ISL_4571001, EPI_ISL_4571002                                                                                                                                                                                                                                                                                                                                                                                                                                                                                                                                                                                                                                                                                                                                                                                                                                                                                                                                                                                                                                                                                                                                                                                                                                                                                                                                                                                                                                                                                                                                                                                                                                                                                                                                                                                                                                                                                                                                                                                                                                                                                                                                                                                                                                                                                                                                                                                                                                                                                                                                                                                                                                                                                                                                                                                                                                                                                                     | Azienda Ospedaliera Universitaria San Andrea                                                     | University Campus Bio-Medico of Rome (UCBM)                                                      | Angeletti S.; De Florio L.; Fogolari M.; Francesconi M.; Lintas C.; Riva E.; Veralli R.                                                                                                                                     |
| EPI_ISL_4571197                                                                                                                                                                                                                                                                                                                                                                                                                                                                                                                                                                                                                                                                                                                                                                                                                                                                                                                                                                                                                                                                                                                                                                                                                                                                                                                                                                                                                                                                                                                                                                                                                                                                                                                                                                                                                                                                                                                                                                                                                                                                                                                                                                                                                                                                                                                                                                                                                                                                                                                                                                                                                                                                                                                                                                                                                                                                                                                      | Azienda Sanitaria Locale Viterbo, Ospedate di Belcolle-Viterbo                                   | University Campus Bio-Medico of Rome (UCBM)                                                      | Angeletti S.; De Florio L.; Fogolari M.; Francesconi M.; Lintas C.; Riva E.; Veralli R.                                                                                                                                     |
| EPI_ISL_4498690, EPI_ISL_4498693, EPI_ISL_4498697, EPI_ISL_4498699                                                                                                                                                                                                                                                                                                                                                                                                                                                                                                                                                                                                                                                                                                                                                                                                                                                                                                                                                                                                                                                                                                                                                                                                                                                                                                                                                                                                                                                                                                                                                                                                                                                                                                                                                                                                                                                                                                                                                                                                                                                                                                                                                                                                                                                                                                                                                                                                                                                                                                                                                                                                                                                                                                                                                                                                                                                                   | Data Medica-Rome-Italy                                                                           | University Campus Bio-Medico of Rome (UCBM)                                                      | Angeletti S.; De Florio L.; Fogolari M.; Francesconi M.; Lintas C.; Riva E.; Veralli R.                                                                                                                                     |
| EPI_ISL_4270081, EPI_ISL_4270085, EPI_ISL_4270099, EPI_ISL_4270102, EPI_ISL_4305186, EPI_ISL_4305190, EPI_ISL_4443070, EPI_ISL_4443072, EPI_ISL_4443075, EPI_ISL_4443077, EPI_ISL_4443079, EPI_ISL_4443081, EPI_ISL_4443083, EPI_ISL_4443086, EPI_ISL_4443088, EPI_ISL_4443091, EPI_ISL_4443096, EPI_ISL_4443098, EPI_ISL_4443099, EPI_ISL_4443100, EPI_ISL_4443101, EPI_ISL_4443110, EPI_ISL_4443115, EPI_ISL_4443119, EPI_ISL_4443128, EPI_ISL_4443131, EPI_ISL_4443135, EPI_ISL_4443137, EPI_ISL_4443139, EPI_ISL_4443141, EPI_ISL_4443143, EPI_ISL_4443145, EPI_ISL_4443147, EPI_ISL_4508166, EPI_ISL_4508167, EPI_ISL_4508169, EPI_ISL_4508171, EPI_ISL_4508172, EPI_ISL_4508173, EPI_ISL_4533451, EPI_ISL_4533452, EPI_ISL_4533453, EPI_ISL_4533454, EPI_ISL_4533455, EPI_ISL_4533456, EPI_ISL_4533457, EPI_ISL_4533458, EPI_ISL_4533459, EPI_ISL_4533460, EPI_ISL_4533461, EPI_ISL_4533462, EPI_ISL_4533463, EPI_ISL_4533760, EPI_ISL_4533761, EPI_ISL_4533762, EPI_ISL_4533763, EPI_ISL_4533764, EPI_ISL_4533765, EPI_ISL_4533766, EPI_ISL_4533767, EPI_ISL_4533768, EPI_ISL_4533769, EPI_ISL_4533770, EPI_ISL_4533771, EPI_ISL_4533772, EPI_ISL_4541033, EPI_ISL_4541037, EPI_ISL_4541039, EPI_ISL_4541041, EPI_ISL_4541043, EPI_ISL_4541044, EPI_ISL_4541046, EPI_ISL_4541047, EPI_ISL_4541050, EPI_ISL_4541051, EPI_ISL_4541053, EPI_ISL_4541055, EPI_ISL_4541059, EPI_ISL_4553160, EPI_ISL_4553161, EPI_ISL_4553162, EPI_ISL_4553163, EPI_ISL_4553164, EPI_ISL_4553165, EPI_ISL_4563803, EPI_ISL_4563804, EPI_ISL_4563805, EPI_ISL_4563806, EPI_ISL_4563807, EPI_ISL_4563808, EPI_ISL_4563809, EPI_ISL_4563810, EPI_ISL_4563811, EPI_ISL_4563812, EPI_ISL_4563813, EPI_ISL_4563814, EPI_ISL_4563815, EPI_ISL_4563816, EPI_ISL_4563817, EPI_ISL_4563818, EPI_ISL_4563819, EPI_ISL_4563820, EPI_ISL_4563821, EPI_ISL_4563822, EPI_ISL_4563823, EPI_ISL_4563824, EPI_ISL_4563825, EPI_ISL_4563826, EPI_ISL_4563827, EPI_ISL_4563828, EPI_ISL_4563829, EPI_ISL_4563830, EPI_ISL_4563831, EPI_ISL_4563832, EPI_ISL_4563833, EPI_ISL_4563834, EPI_ISL_4563835, EPI_ISL_4563836, EPI_ISL_4563837, EPI_ISL_4563838, EPI_ISL_4563839, EPI_ISL_4629416, EPI_ISL_4633982, EPI_ISL_4633983, EPI_ISL_4633984, EPI_ISL_4633985, EPI_ISL_4633986, EPI_ISL_4633987, EPI_ISL_4633988, EPI_ISL_4633989, EPI_ISL_4633990, EPI_ISL_4633991, EPI_ISL_4633992, EPI_ISL_4633993, EPI_ISL_4633994, EPI_ISL_4633995, EPI_ISL_4633996, EPI_ISL_4633997, EPI_ISL_4633998, EPI_ISL_4634000, EPI_ISL_4634001, EPI_ISL_4634002, EPI_ISL_4634003, EPI_ISL_4634004, EPI_ISL_4634005, EPI_ISL_4634006, EPI_ISL_4634007, EPI_ISL_4634008, EPI_ISL_4634009, EPI_ISL_4634010, EPI_ISL_4634011, EPI_ISL_4634012, EPI_ISL_4634013, EPI_ISL_4634014, EPI_ISL_4634015, EPI_ISL_4634016, EPI_ISL_4634017, EPI_ISL_4634019, EPI_ISL_4672096, EPI_ISL_4672109, EPI_ISL_4672120, EPI_ISL_4672126, EPI_ISL_4672149, EPI_ISL_4672163, EPI_ISL_4672171, EPI_ISL_4672179 | Diartimento di Medicina di Laboratorio, Azienda sanitaria universitaria Friuli Centrale (ASU FC) | Diartimento di Medicina di Laboratorio, Azienda sanitaria universitaria Friuli Centrale (ASU FC) | Catia Mio; Chiara Dal Secco; Corrado Pipan; Federica Baldani; Francesco Curcio; Stefania Marzintotto                                                                                                                        |
| see above                                                                                                                                                                                                                                                                                                                                                                                                                                                                                                                                                                                                                                                                                                                                                                                                                                                                                                                                                                                                                                                                                                                                                                                                                                                                                                                                                                                                                                                                                                                                                                                                                                                                                                                                                                                                                                                                                                                                                                                                                                                                                                                                                                                                                                                                                                                                                                                                                                                                                                                                                                                                                                                                                                                                                                                                                                                                                                                            | Diartimento di Medicina di Laboratorio, Azienda sanitaria universitaria Friuli Centrale (ASU FC) | Diartimento di Medicina di Laboratorio, Azienda sanitaria universitaria Friuli Centrale (ASU FC) | Catia Mio; Chiara Dal Secco; Corrado Pipan; Federica Baldani; Francesco Curcio; Stefania Marzintotto                                                                                                                        |
| EPI_ISL_4545890, EPI_ISL_4545891, EPI_ISL_4545892, EPI_ISL_4545894, EPI_ISL_4546089                                                                                                                                                                                                                                                                                                                                                                                                                                                                                                                                                                                                                                                                                                                                                                                                                                                                                                                                                                                                                                                                                                                                                                                                                                                                                                                                                                                                                                                                                                                                                                                                                                                                                                                                                                                                                                                                                                                                                                                                                                                                                                                                                                                                                                                                                                                                                                                                                                                                                                                                                                                                                                                                                                                                                                                                                                                  | Eurofins Genoma Group S.r.l. (Rome)                                                              | University Campus Bio-Medico of Rome (UCBM)                                                      | Angeletti S.; De Florio L.; Fogolari M.; Francesconi M.; Lintas C.; Riva E.; Veralli R.                                                                                                                                     |
| EPI_ISL_4339180, EPI_ISL_4339182, EPI_ISL_4339185, EPI_ISL_4339191, EPI_ISL_4339193, EPI_ISL_4339197, EPI_ISL_4339200, EPI_ISL_4339203, EPI_ISL_4339205                                                                                                                                                                                                                                                                                                                                                                                                                                                                                                                                                                                                                                                                                                                                                                                                                                                                                                                                                                                                                                                                                                                                                                                                                                                                                                                                                                                                                                                                                                                                                                                                                                                                                                                                                                                                                                                                                                                                                                                                                                                                                                                                                                                                                                                                                                                                                                                                                                                                                                                                                                                                                                                                                                                                                                              | Fondazione IRCCS Ca' Granda Ospedale Maggiore Policlinico                                        | Fondazione del Piemonte per l'Oncologia IRCCS                                                    | Antonino Sottile; Giorgio Giardina; Paola Marino; Silvia Brossa                                                                                                                                                             |
| see above                                                                                                                                                                                                                                                                                                                                                                                                                                                                                                                                                                                                                                                                                                                                                                                                                                                                                                                                                                                                                                                                                                                                                                                                                                                                                                                                                                                                                                                                                                                                                                                                                                                                                                                                                                                                                                                                                                                                                                                                                                                                                                                                                                                                                                                                                                                                                                                                                                                                                                                                                                                                                                                                                                                                                                                                                                                                                                                            | Fondazione IRCCS Ca' Granda Ospedale Maggiore Policlinico                                        | Fondazione del Piemonte per l'Oncologia IRCCS                                                    | Antonino Sottile; Giorgio Giardina; Paola Marino; Silvia Brossa                                                                                                                                                             |
| EPI_ISL_4256817, EPI_ISL_4256818                                                                                                                                                                                                                                                                                                                                                                                                                                                                                                                                                                                                                                                                                                                                                                                                                                                                                                                                                                                                                                                                                                                                                                                                                                                                                                                                                                                                                                                                                                                                                                                                                                                                                                                                                                                                                                                                                                                                                                                                                                                                                                                                                                                                                                                                                                                                                                                                                                                                                                                                                                                                                                                                                                                                                                                                                                                                                                     | Fondazione del Piemonte per l'Oncologia IRCCS                                                    | Fondazione del Piemonte per l'Oncologia IRCCS                                                    | Antonino Sottile; Giorgio Giardina; Paola Marino; Silvia Brossa                                                                                                                                                             |
| EPI_ISL_4546368, EPI_ISL_4546546                                                                                                                                                                                                                                                                                                                                                                                                                                                                                                                                                                                                                                                                                                                                                                                                                                                                                                                                                                                                                                                                                                                                                                                                                                                                                                                                                                                                                                                                                                                                                                                                                                                                                                                                                                                                                                                                                                                                                                                                                                                                                                                                                                                                                                                                                                                                                                                                                                                                                                                                                                                                                                                                                                                                                                                                                                                                                                     | INMI Lazzaro Spallanzani - Istituto Nazionale Malattie Infettive                                 | University Campus Bio-Medico of Rome (UCBM)                                                      | Angeletti S.; De Florio L.; Fogolari M.; Francesconi M.; Lintas C.; Riva E.; Veralli R.                                                                                                                                     |
| EPI_ISL_4223134, EPI_ISL_4223136, EPI_ISL_4223138, EPI_ISL_4223140, EPI_ISL_4223142, EPI_ISL_4223144, EPI_ISL_4223146, EPI_ISL_4472532, EPI_ISL_4472533, EPI_ISL_4472535, EPI_ISL_4472536, EPI_ISL_4472537, EPI_ISL_4472538, EPI_ISL_4472539                                                                                                                                                                                                                                                                                                                                                                                                                                                                                                                                                                                                                                                                                                                                                                                                                                                                                                                                                                                                                                                                                                                                                                                                                                                                                                                                                                                                                                                                                                                                                                                                                                                                                                                                                                                                                                                                                                                                                                                                                                                                                                                                                                                                                                                                                                                                                                                                                                                                                                                                                                                                                                                                                         | Istituto Auxologico Italiano                                                                     | Istituto Auxologico Italiano                                                                     | Erminio Torresani                                                                                                                                                                                                           |
| see above                                                                                                                                                                                                                                                                                                                                                                                                                                                                                                                                                                                                                                                                                                                                                                                                                                                                                                                                                                                                                                                                                                                                                                                                                                                                                                                                                                                                                                                                                                                                                                                                                                                                                                                                                                                                                                                                                                                                                                                                                                                                                                                                                                                                                                                                                                                                                                                                                                                                                                                                                                                                                                                                                                                                                                                                                                                                                                                            | Istituto Auxologico Italiano                                                                     | Istituto Auxologico Italiano                                                                     | Erminio Torresani                                                                                                                                                                                                           |
| EPI_ISL_4498835, EPI_ISL_4498836, EPI_ISL_4498837, EPI_ISL_4498838, EPI_ISL_4498839, EPI_ISL_4687991, EPI_ISL_4688321, EPI_ISL_4688718, EPI_ISL_4689095, EPI_ISL_4689521, EPI_ISL_4690600, EPI_ISL_4690814, EPI_ISL_4694398, EPI_ISL_4694823                                                                                                                                                                                                                                                                                                                                                                                                                                                                                                                                                                                                                                                                                                                                                                                                                                                                                                                                                                                                                                                                                                                                                                                                                                                                                                                                                                                                                                                                                                                                                                                                                                                                                                                                                                                                                                                                                                                                                                                                                                                                                                                                                                                                                                                                                                                                                                                                                                                                                                                                                                                                                                                                                         |                                                                                                  |                                                                                                  |                                                                                                                                                                                                                             |
