# Supplementary material for: SARS-COV-2 δ variant drives the pandemic in India and Europe via two subvariants
Source: bioRxiv or medRxiv preprint supplement (doi:10.1101/2021.10.16.21265096), 2021-10-20
Supplement: Supplementary file [file media-8.pdf]

We gratefully acknowledge the following Authors from the Originating laboratories responsible for obtaining the specimens, as well as the Submitting laboratories where the genome data were generated and shared via GISAID, on which this research is based.

All Submitters of data may be contacted directly via [www.gisaid.org](http://www.gisaid.org)

Authors are sorted alphabetically.

| Accession ID                                                                                                                                                                                                                                                                                                                                                                                                                                                                                                                                                                                                                                                                                                                                              | Originating Laboratory                                                                               | Submitting Laboratory                                                                       | Authors                                                                                                                                                                                                                                                                             |
|-----------------------------------------------------------------------------------------------------------------------------------------------------------------------------------------------------------------------------------------------------------------------------------------------------------------------------------------------------------------------------------------------------------------------------------------------------------------------------------------------------------------------------------------------------------------------------------------------------------------------------------------------------------------------------------------------------------------------------------------------------------|------------------------------------------------------------------------------------------------------|---------------------------------------------------------------------------------------------|-------------------------------------------------------------------------------------------------------------------------------------------------------------------------------------------------------------------------------------------------------------------------------------|
| EPI_ISL_4606197, EPI_ISL_4606198, EPI_ISL_4606199, EPI_ISL_4606200, EPI_ISL_4606201, EPI_ISL_4606202, EPI_ISL_4606203, EPI_ISL_4606204, EPI_ISL_4606205, EPI_ISL_4606206, EPI_ISL_4606207, EPI_ISL_4606208, EPI_ISL_4606209, EPI_ISL_4606210, EPI_ISL_4606211                                                                                                                                                                                                                                                                                                                                                                                                                                                                                             | see above                                                                                            | ASTRALAB TASSIGNY<br>CNR Virus des Infections Respiratoires - France SUD                    | Antonin Bal; Bruno Lina; Gregory Destras; Gwendolynne Burfin; Hadrien Regue; Laurence Josset; Martine Valette; Quentin Semanas                                                                                                                                                      |
| EPI_ISL_4606261, EPI_ISL_4606262, EPI_ISL_4606263, EPI_ISL_4606264, EPI_ISL_4606265, EPI_ISL_4606267, EPI_ISL_4606268, EPI_ISL_4606269, EPI_ISL_4606270, EPI_ISL_4606271, EPI_ISL_4606272, EPI_ISL_4606273, EPI_ISL_4606274, EPI_ISL_4606275, EPI_ISL_4606276, EPI_ISL_4606277, EPI_ISL_4606278, EPI_ISL_4606279, EPI_ISL_4606280, EPI_ISL_4606281, EPI_ISL_4606950, EPI_ISL_4606951, EPI_ISL_4606954, EPI_ISL_4606960, EPI_ISL_4606961                                                                                                                                                                                                                                                                                                                   | see above                                                                                            | AX BIO OCEAN<br>CNR Virus des Infections Respiratoires - France SUD                         | Antonin Bal; Bruno Lina; Gregory Destras; Gwendolynne Burfin; Hadrien Regue; Laurence Josset; Martine Valette; Quentin Semanas                                                                                                                                                      |
| EPI_ISL_4186460                                                                                                                                                                                                                                                                                                                                                                                                                                                                                                                                                                                                                                                                                                                                           | Arlon                                                                                                | Plateforme de testing Namuroise                                                             | Degossier Jonathan; Demars Aurore; Denis Olivier; Maschietto Céline; Mullier François; Nobis Chloé; Nyinkeu Kemamen Lesly; Otto Gaetan                                                                                                                                              |
| EPI_ISL_4503713, EPI_ISL_4503714, EPI_ISL_4503768, EPI_ISL_4600727, EPI_ISL_4600728                                                                                                                                                                                                                                                                                                                                                                                                                                                                                                                                                                                                                                                                       | Armies                                                                                               | National Reference Center for Viruses of Respiratory Infections, Institut Pasteur, Paris    | Angela Brisebarre; Camille Capel; Christophe Malabat; Corinne Maufras; Etienne Simon-Lorière; Frédéric Lemoine; Julien Fumey; Louise Lefrançois; Marine Desroches; Marion Barbet; Maud Vanpeene; Méline Bizard; Slim El Khiairi; Sylvie Behilli; Sylvie Van der Werf; Vincent Enouf |
| EPI_ISL_4607026, EPI_ISL_4607027, EPI_ISL_4607028, EPI_ISL_4607029, EPI_ISL_4607030, EPI_ISL_4607034, EPI_ISL_4607044, EPI_ISL_4607046, EPI_ISL_4607070, EPI_ISL_4607071, EPI_ISL_4607072, EPI_ISL_4607073, EPI_ISL_4607074                                                                                                                                                                                                                                                                                                                                                                                                                                                                                                                               | see above                                                                                            | BIOFFICE - LBM RAVEZIES<br>CNR Virus des Infections Respiratoires - France SUD              | Antonin Bal; Bruno Lina; Gregory Destras; Gwendolynne Burfin; Hadrien Regue; Laurence Josset; Martine Valette; Quentin Semanas                                                                                                                                                      |
| EPI_ISL_4605280, EPI_ISL_4605284, EPI_ISL_4605293, EPI_ISL_4605306, EPI_ISL_4605315, EPI_ISL_4605318, EPI_ISL_4605320, EPI_ISL_4605330, EPI_ISL_4605331, EPI_ISL_4605332, EPI_ISL_4605337, EPI_ISL_4605338, EPI_ISL_4605340, EPI_ISL_4605357, EPI_ISL_4605362, EPI_ISL_4605369, EPI_ISL_4605371, EPI_ISL_4605372, EPI_ISL_4605376, EPI_ISL_4605383, EPI_ISL_4605391, EPI_ISL_4606987, EPI_ISL_4606989, EPI_ISL_4606992, EPI_ISL_4606995, EPI_ISL_4607001, EPI_ISL_4607004, EPI_ISL_4607008, EPI_ISL_4607012, EPI_ISL_4607015, EPI_ISL_4607019, EPI_ISL_4607021, EPI_ISL_4607022, EPI_ISL_4607023, EPI_ISL_4607024, EPI_ISL_4607025                                                                                                                        | see above                                                                                            | BIOLAB 33<br>CNR Virus des Infections Respiratoires - France SUD                            | Antonin Bal; Bruno Lina; Gregory Destras; Gwendolynne Burfin; Hadrien Regue; Laurence Josset; Martine Valette; Quentin Semanas                                                                                                                                                      |
| EPI_ISL_4605947, EPI_ISL_4605948, EPI_ISL_4605949, EPI_ISL_4605950, EPI_ISL_4605951, EPI_ISL_4605952, EPI_ISL_4605953, EPI_ISL_4605954, EPI_ISL_4606017, EPI_ISL_4606020, EPI_ISL_4606023, EPI_ISL_4606025, EPI_ISL_4606027, EPI_ISL_4606029, EPI_ISL_4606032, EPI_ISL_4606034, EPI_ISL_4606036, EPI_ISL_4606039, EPI_ISL_4606041, EPI_ISL_4606044, EPI_ISL_4606047, EPI_ISL_4606104, EPI_ISL_4606105, EPI_ISL_4606107, EPI_ISL_4606108, EPI_ISL_4606109, EPI_ISL_4606110, EPI_ISL_4606111, EPI_ISL_4606113, EPI_ISL_4606114, EPI_ISL_4606115, EPI_ISL_4606116, EPI_ISL_4606117, EPI_ISL_4606118, EPI_ISL_4606119, EPI_ISL_4606120, EPI_ISL_4606121, EPI_ISL_4606122, EPI_ISL_4606123, EPI_ISL_4606124, EPI_ISL_4606125, EPI_ISL_4606126, EPI_ISL_4606127 | see above                                                                                            | BIOLITTORAL BIOGROUP PLATEAU TECH<br>CNR Virus des Infections Respiratoires - France SUD    | Antonin Bal; Bruno Lina; Gregory Destras; Gwendolynne Burfin; Hadrien Regue; Laurence Josset; Martine Valette; Quentin Semanas                                                                                                                                                      |
| EPI_ISL_4606554, EPI_ISL_4606560, EPI_ISL_4606565, EPI_ISL_4606567, EPI_ISL_4606568, EPI_ISL_4606571                                                                                                                                                                                                                                                                                                                                                                                                                                                                                                                                                                                                                                                      | EPI_ISL_4606554, EPI_ISL_4606560, EPI_ISL_4606565, EPI_ISL_4606567, EPI_ISL_4606568, EPI_ISL_4606571 | BIOMER LABORATOIRE ST DIE<br>CNR Virus des Infections Respiratoires - France SUD            | Antonin Bal; Bruno Lina; Gregory Destras; Gwendolynne Burfin; Hadrien Regue; Laurence Josset; Martine Valette; Quentin Semanas                                                                                                                                                      |
| EPI_ISL_4605936, EPI_ISL_4605937, EPI_ISL_4605938, EPI_ISL_4605939, EPI_ISL_4605941, EPI_ISL_4605942, EPI_ISL_4605943, EPI_ISL_4605944                                                                                                                                                                                                                                                                                                                                                                                                                                                                                                                                                                                                                    | see above                                                                                            | BIOPTIMA - VEZERONCE CURTIN<br>CNR Virus des Infections Respiratoires - France SUD          | Antonin Bal; Bruno Lina; Gregory Destras; Gwendolynne Burfin; Hadrien Regue; Laurence Josset; Martine Valette; Quentin Semanas                                                                                                                                                      |
| EPI_ISL_4539760, EPI_ISL_4539761, EPI_ISL_4539762                                                                                                                                                                                                                                                                                                                                                                                                                                                                                                                                                                                                                                                                                                         | EPI_ISL_4539760, EPI_ISL_4539761, EPI_ISL_4539762                                                    | C.H. LE DAMANY LANNION-TRESTEL<br>CHU Pontchaillou                                          | DE TAYRAC Marie; DENOUAL Florent; DUFOUR Marie Jose; ETCHEVERRY Amandine; FEBREAU Christine; GALIBERT Marie Dominique; GROHLIER Claire; JAGLINE Steven; PRONIER Charlotte; QUENET Benjamin; SASSI Mohamed; THIBAUT Vincent                                                          |
| EPI_ISL_4606362, EPI_ISL_4606363, EPI_ISL_4606366, EPI_ISL_4606368, EPI_ISL_4606369, EPI_ISL_4606371, EPI_ISL_4606373, EPI_ISL_4606374, EPI_ISL_4606977                                                                                                                                                                                                                                                                                                                                                                                                                                                                                                                                                                                                   | see above                                                                                            | C.H.R.U. MONTPIED<br>CNR Virus des Infections Respiratoires - France SUD                    | Antonin Bal; Bruno Lina; Gregory Destras; Gwendolynne Burfin; Hadrien Regue; Laurence Josset; Martine Valette; Quentin Semanas                                                                                                                                                      |
| EPI_ISL_4606310, EPI_ISL_4606313, EPI_ISL_4606638                                                                                                                                                                                                                                                                                                                                                                                                                                                                                                                                                                                                                                                                                                         | EPI_ISL_4606310, EPI_ISL_4606313, EPI_ISL_4606638                                                    | CENTRE HOSPITALIER<br>CNR Virus des Infections Respiratoires - France SUD                   | Antonin Bal; Bruno Lina; Gregory Destras; Gwendolynne Burfin; Hadrien Regue; Laurence Josset; Martine Valette; Quentin Semanas                                                                                                                                                      |
| EPI_ISL_4606417, EPI_ISL_4606418, EPI_ISL_4606420                                                                                                                                                                                                                                                                                                                                                                                                                                                                                                                                                                                                                                                                                                         | EPI_ISL_4606417, EPI_ISL_4606418, EPI_ISL_4606420                                                    | CENTRE HOSPITALIER DE LA COTE BASQUE<br>CNR Virus des Infections Respiratoires - France SUD | Antonin Bal; Bruno Lina; Gregory Destras; Gwendolynne Burfin; Hadrien Regue; Laurence Josset; Martine Valette; Quentin Semanas                                                                                                                                                      |
| EPI_ISL_4605654, EPI_ISL_4606132, EPI_ISL_4606133, EPI_ISL_4606134, EPI_ISL_4606139, EPI_ISL_4606290, EPI_ISL_4606292, EPI_ISL_4606294, EPI_ISL_4606295, EPI_ISL_4606422, EPI_ISL_4606976                                                                                                                                                                                                                                                                                                                                                                                                                                                                                                                                                                 | see above                                                                                            | CENTRE HOSPITALIER DE VALENCE<br>CNR Virus des Infections Respiratoires - France SUD        | Antonin Bal; Bruno Lina; Gregory Destras; Gwendolynne Burfin; Hadrien Regue; Laurence Josset; Martine Valette; Quentin Semanas                                                                                                                                                      |
| EPI_ISL_4606321, EPI_ISL_4606323, EPI_ISL_4606324                                                                                                                                                                                                                                                                                                                                                                                                                                                                                                                                                                                                                                                                                                         | EPI_ISL_4606321, EPI_ISL_4606323, EPI_ISL_4606324                                                    | CENTRE HOSPITALIER DUPUYTREN<br>CNR Virus des Infections Respiratoires - France SUD         | Antonin Bal; Bruno Lina; Gregory Destras; Gwendolynne Burfin; Hadrien Regue; Laurence Josset; Martine Valette; Quentin Semanas                                                                                                                                                      |
| EPI_ISL_4607114                                                                                                                                                                                                                                                                                                                                                                                                                                                                                                                                                                                                                                                                                                                                           | EPI_ISL_4607114                                                                                      | CENTRE HOSPITALIER EMILE ROUX<br>CNR Virus des Infections Respiratoires - France SUD        | Antonin Bal; Bruno Lina; Gregory Destras; Gwendolynne Burfin; Hadrien Regue; Laurence Josset; Martine Valette; Quentin Semanas                                                                                                                                                      |
| EPI_ISL_4326321                                                                                                                                                                                                                                                                                                                                                                                                                                                                                                                                                                                                                                                                                                                                           | EPI_ISL_4326321                                                                                      | CENTRE HOSPITALIER LUCIEN HUSSEL<br>CNR Virus des Infections Respiratoires - France SUD     | Antonin Bal; Bruno Lina; Gregory Destras; Gwendolynne Burfin; Hadrien Regue; Laurence Josset; Martine Valette; Quentin Semanas                                                                                                                                                      |
| EPI_ISL_4607077                                                                                                                                                                                                                                                                                                                                                                                                                                                                                                                                                                                                                                                                                                                                           | EPI_ISL_4607077                                                                                      | CENTRE HOSPITALIER NIORT<br>CNR Virus des Infections Respiratoires - France SUD             | Antonin Bal; Bruno Lina; Gregory Destras; Gwendolynne Burfin; Hadrien Regue; Laurence Josset; Martine Valette; Quentin Semanas                                                                                                                                                      |
| EPI_ISL_4606347, EPI_ISL_4606351, EPI_ISL_4606353, EPI_ISL_4606354, EPI_ISL_4606356, EPI_ISL_4606358, EPI_ISL_4606360                                                                                                                                                                                                                                                                                                                                                                                                                                                                                                                                                                                                                                     | see above                                                                                            | CENTRE HOSPITALIER PELLEGRIN<br>CNR Virus des Infections Respiratoires - France SUD         | Antonin Bal; Bruno Lina; Gregory Destras; Gwendolynne Burfin; Hadrien Regue; Laurence Josset; Martine Valette; Quentin Semanas                                                                                                                                                      |
| EPI_ISL_4605716, EPI_ISL_4605978                                                                                                                                                                                                                                                                                                                                                                                                                                                                                                                                                                                                                                                                                                                          | EPI_ISL_4605716, EPI_ISL_4605978                                                                     | CENTRE HOSPITALIER PIERRE OUDOT<br>CNR Virus des Infections Respiratoires - France SUD      | Antonin Bal; Bruno Lina; Gregory Destras; Gwendolynne Burfin; Hadrien Regue; Laurence Josset; Martine Valette; Quentin Semanas                                                                                                                                                      |
| EPI_ISL_4605940, EPI_ISL_4606054, EPI_ISL_4606063, EPI_ISL_4606066, EPI_ISL_4606072, EPI_ISL_4606074, EPI_ISL_4606076                                                                                                                                                                                                                                                                                                                                                                                                                                                                                                                                                                                                                                     | see above                                                                                            | CENTRE HOSPITALIER POITIERS<br>CNR Virus des Infections Respiratoires - France SUD          | Antonin Bal; Bruno Lina; Gregory Destras; Gwendolynne Burfin; Hadrien Regue; Laurence Josset; Martine Valette; Quentin Semanas                                                                                                                                                      |
| EPI_ISL_4326479, EPI_ISL_4326516, EPI_ISL_4605611                                                                                                                                                                                                                                                                                                                                                                                                                                                                                                                                                                                                                                                                                                         | EPI_ISL_4326479, EPI_ISL_4326516, EPI_ISL_4605611                                                    | CENTRE HOSPITALIER ST JOSEPH ST LUC<br>CNR Virus des Infections Respiratoires - France SUD  | Antonin Bal; Bruno Lina; Gregory Destras; Gwendolynne Burfin; Hadrien Regue; Laurence Josset; Martine Valette; Quentin Semanas                                                                                                                                                      |

|                                                                                                                                                                                                                                                                                                                                                                                                                                                                                                                                                                                                                                                                                                                                                                                                                                                                                                                                                                                                                                                                                                                                                                                                                                                                                                                                                                                                                                                                                                                                                                                                                                                                                                                 |                                                              |                                                                                                   |                                                                                                                                                                                                                                                                                                                                                                                                                                                                                                                                                                                                                                                                                                                                                                                                                                                                |                                                                                                                                |
|-----------------------------------------------------------------------------------------------------------------------------------------------------------------------------------------------------------------------------------------------------------------------------------------------------------------------------------------------------------------------------------------------------------------------------------------------------------------------------------------------------------------------------------------------------------------------------------------------------------------------------------------------------------------------------------------------------------------------------------------------------------------------------------------------------------------------------------------------------------------------------------------------------------------------------------------------------------------------------------------------------------------------------------------------------------------------------------------------------------------------------------------------------------------------------------------------------------------------------------------------------------------------------------------------------------------------------------------------------------------------------------------------------------------------------------------------------------------------------------------------------------------------------------------------------------------------------------------------------------------------------------------------------------------------------------------------------------------|--------------------------------------------------------------|---------------------------------------------------------------------------------------------------|----------------------------------------------------------------------------------------------------------------------------------------------------------------------------------------------------------------------------------------------------------------------------------------------------------------------------------------------------------------------------------------------------------------------------------------------------------------------------------------------------------------------------------------------------------------------------------------------------------------------------------------------------------------------------------------------------------------------------------------------------------------------------------------------------------------------------------------------------------------|--------------------------------------------------------------------------------------------------------------------------------|
| EPI_ISL_4606130,<br>EPI_ISL_4606131                                                                                                                                                                                                                                                                                                                                                                                                                                                                                                                                                                                                                                                                                                                                                                                                                                                                                                                                                                                                                                                                                                                                                                                                                                                                                                                                                                                                                                                                                                                                                                                                                                                                             |                                                              |                                                                                                   |                                                                                                                                                                                                                                                                                                                                                                                                                                                                                                                                                                                                                                                                                                                                                                                                                                                                |                                                                                                                                |
| EPI_ISL_4606316,<br>EPI_ISL_4606318,<br>EPI_ISL_4606319                                                                                                                                                                                                                                                                                                                                                                                                                                                                                                                                                                                                                                                                                                                                                                                                                                                                                                                                                                                                                                                                                                                                                                                                                                                                                                                                                                                                                                                                                                                                                                                                                                                         | CENTRE<br>HOSPITALIER<br>VAL D'ARIEGE                        | CNR Virus des Infections<br>Respiratoires - France<br>SUD                                         |                                                                                                                                                                                                                                                                                                                                                                                                                                                                                                                                                                                                                                                                                                                                                                                                                                                                | Antonin Bal; Bruno Lina; Gregory Destras; Gwendolynne Burfin; Hadrien Regue; Laurence Josset; Martine Valette; Quentin Semanas |
| EPI_ISL_4605855, EPI_ISL_4605858, EPI_ISL_4605862, EPI_ISL_4605867, EPI_ISL_4605868, EPI_ISL_4605871, EPI_ISL_4605873                                                                                                                                                                                                                                                                                                                                                                                                                                                                                                                                                                                                                                                                                                                                                                                                                                                                                                                                                                                                                                                                                                                                                                                                                                                                                                                                                                                                                                                                                                                                                                                           |                                                              |                                                                                                   |                                                                                                                                                                                                                                                                                                                                                                                                                                                                                                                                                                                                                                                                                                                                                                                                                                                                |                                                                                                                                |
| see above                                                                                                                                                                                                                                                                                                                                                                                                                                                                                                                                                                                                                                                                                                                                                                                                                                                                                                                                                                                                                                                                                                                                                                                                                                                                                                                                                                                                                                                                                                                                                                                                                                                                                                       | CERBALLIANCE<br>CHARENTES<br>SAINTES                         | CNR Virus des Infections<br>Respiratoires - France<br>SUD                                         |                                                                                                                                                                                                                                                                                                                                                                                                                                                                                                                                                                                                                                                                                                                                                                                                                                                                | Antonin Bal; Bruno Lina; Gregory Destras; Gwendolynne Burfin; Hadrien Regue; Laurence Josset; Martine Valette; Quentin Semanas |
| EPI_ISL_4605409, EPI_ISL_4605418, EPI_ISL_4605419, EPI_ISL_4605427, EPI_ISL_4605435, EPI_ISL_4605442, EPI_ISL_4605451, EPI_ISL_4605454, EPI_ISL_4605457, EPI_ISL_4605458, EPI_ISL_4605459, EPI_ISL_4605461, EPI_ISL_4605465, EPI_ISL_4605467, EPI_ISL_4605468, EPI_ISL_4605480, EPI_ISL_4605484, EPI_ISL_4605492, EPI_ISL_4605500, EPI_ISL_4605509, EPI_ISL_4605516, EPI_ISL_4605520, EPI_ISL_4605523, EPI_ISL_4605524, EPI_ISL_4605529, EPI_ISL_4605531, EPI_ISL_4605537, EPI_ISL_4605540, EPI_ISL_4605550, EPI_ISL_4605557, EPI_ISL_4605561, EPI_ISL_4605568, EPI_ISL_4606739, EPI_ISL_4606740, EPI_ISL_4606741, EPI_ISL_4606743, EPI_ISL_4606748, EPI_ISL_4606772, EPI_ISL_4606773, EPI_ISL_4606776, EPI_ISL_4606778, EPI_ISL_4606785, EPI_ISL_4606816, EPI_ISL_4606817, EPI_ISL_4606818, EPI_ISL_4606819, EPI_ISL_4606822, EPI_ISL_4606823, EPI_ISL_4606824                                                                                                                                                                                                                                                                                                                                                                                                                                                                                                                                                                                                                                                                                                                                                                                                                                                 |                                                              |                                                                                                   |                                                                                                                                                                                                                                                                                                                                                                                                                                                                                                                                                                                                                                                                                                                                                                                                                                                                |                                                                                                                                |
| see above                                                                                                                                                                                                                                                                                                                                                                                                                                                                                                                                                                                                                                                                                                                                                                                                                                                                                                                                                                                                                                                                                                                                                                                                                                                                                                                                                                                                                                                                                                                                                                                                                                                                                                       | CERBALLIANCE<br>OCCITANIE                                    | CNR Virus des Infections<br>Respiratoires - France<br>SUD                                         |                                                                                                                                                                                                                                                                                                                                                                                                                                                                                                                                                                                                                                                                                                                                                                                                                                                                | Antonin Bal; Bruno Lina; Gregory Destras; Gwendolynne Burfin; Hadrien Regue; Laurence Josset; Martine Valette; Quentin Semanas |
| EPI_ISL_4606632                                                                                                                                                                                                                                                                                                                                                                                                                                                                                                                                                                                                                                                                                                                                                                                                                                                                                                                                                                                                                                                                                                                                                                                                                                                                                                                                                                                                                                                                                                                                                                                                                                                                                                 | CH ANTIBES -<br>JUAN LES PINS                                | CNR Virus des Infections<br>Respiratoires - France<br>SUD                                         |                                                                                                                                                                                                                                                                                                                                                                                                                                                                                                                                                                                                                                                                                                                                                                                                                                                                | Antonin Bal; Bruno Lina; Gregory Destras; Gwendolynne Burfin; Hadrien Regue; Laurence Josset; Martine Valette; Quentin Semanas |
| EPI_ISL_4606005                                                                                                                                                                                                                                                                                                                                                                                                                                                                                                                                                                                                                                                                                                                                                                                                                                                                                                                                                                                                                                                                                                                                                                                                                                                                                                                                                                                                                                                                                                                                                                                                                                                                                                 | CH GIVORS                                                    | CNR Virus des Infections<br>Respiratoires - France<br>SUD                                         |                                                                                                                                                                                                                                                                                                                                                                                                                                                                                                                                                                                                                                                                                                                                                                                                                                                                | Antonin Bal; Bruno Lina; Gregory Destras; Gwendolynne Burfin; Hadrien Regue; Laurence Josset; Martine Valette; Quentin Semanas |
| EPI_ISL_4607020,<br>EPI_ISL_4607031,<br>EPI_ISL_4607035,<br>EPI_ISL_4607043,<br>EPI_ISL_4607045,<br>EPI_ISL_4607075                                                                                                                                                                                                                                                                                                                                                                                                                                                                                                                                                                                                                                                                                                                                                                                                                                                                                                                                                                                                                                                                                                                                                                                                                                                                                                                                                                                                                                                                                                                                                                                             | CHU GRENOBLE                                                 | CNR Virus des Infections<br>Respiratoires - France<br>SUD                                         |                                                                                                                                                                                                                                                                                                                                                                                                                                                                                                                                                                                                                                                                                                                                                                                                                                                                | Antonin Bal; Bruno Lina; Gregory Destras; Gwendolynne Burfin; Hadrien Regue; Laurence Josset; Martine Valette; Quentin Semanas |
| EPI_ISL_4548669, EPI_ISL_4548670, EPI_ISL_4548671, EPI_ISL_4548672, EPI_ISL_4548673, EPI_ISL_4558227, EPI_ISL_4558228, EPI_ISL_4558229, EPI_ISL_4558230, EPI_ISL_4558231, EPI_ISL_4558232, EPI_ISL_4558233, EPI_ISL_4558234                                                                                                                                                                                                                                                                                                                                                                                                                                                                                                                                                                                                                                                                                                                                                                                                                                                                                                                                                                                                                                                                                                                                                                                                                                                                                                                                                                                                                                                                                     |                                                              |                                                                                                   |                                                                                                                                                                                                                                                                                                                                                                                                                                                                                                                                                                                                                                                                                                                                                                                                                                                                | Agathe Boudet; Marie-Josée Carles; Sophie Bravo; Stephan Robin                                                                 |
| see above                                                                                                                                                                                                                                                                                                                                                                                                                                                                                                                                                                                                                                                                                                                                                                                                                                                                                                                                                                                                                                                                                                                                                                                                                                                                                                                                                                                                                                                                                                                                                                                                                                                                                                       | CHU NIMES                                                    | CHU NIMES                                                                                         |                                                                                                                                                                                                                                                                                                                                                                                                                                                                                                                                                                                                                                                                                                                                                                                                                                                                |                                                                                                                                |
| EPI_ISL_4261654,<br>EPI_ISL_4539757,<br>EPI_ISL_4539758,<br>EPI_ISL_4539759                                                                                                                                                                                                                                                                                                                                                                                                                                                                                                                                                                                                                                                                                                                                                                                                                                                                                                                                                                                                                                                                                                                                                                                                                                                                                                                                                                                                                                                                                                                                                                                                                                     | CHU<br>Pontchaillou                                          | CHU Pontchaillou                                                                                  | DE TAYRAC Marie; DENOUAL Florent; ETCHEVERRY Amantine; FEBREAU Christine; GALIBERT Marie Dominique; GROHLIER Claire; JAGLINE Steven; PRONIER Charlotte; QUENET Benjamin; SASSI Mohamed; THIBAUT Vincent                                                                                                                                                                                                                                                                                                                                                                                                                                                                                                                                                                                                                                                        |                                                                                                                                |
| EPI_ISL_4604994, EPI_ISL_4604996, EPI_ISL_4604997, EPI_ISL_4604998, EPI_ISL_4604999, EPI_ISL_4605006, EPI_ISL_4605008, EPI_ISL_4605194, EPI_ISL_4605206, EPI_ISL_4605210, EPI_ISL_4605213, EPI_ISL_4605233                                                                                                                                                                                                                                                                                                                                                                                                                                                                                                                                                                                                                                                                                                                                                                                                                                                                                                                                                                                                                                                                                                                                                                                                                                                                                                                                                                                                                                                                                                      | see above                                                    | CHU ST ETIENNE<br>HOPITAL NORD                                                                    | CNR Virus des Infections<br>Respiratoires - France<br>SUD                                                                                                                                                                                                                                                                                                                                                                                                                                                                                                                                                                                                                                                                                                                                                                                                      | Antonin Bal; Bruno Lina; Gregory Destras; Gwendolynne Burfin; Hadrien Regue; Laurence Josset; Martine Valette; Quentin Semanas |
| EPI_ISL_4606784                                                                                                                                                                                                                                                                                                                                                                                                                                                                                                                                                                                                                                                                                                                                                                                                                                                                                                                                                                                                                                                                                                                                                                                                                                                                                                                                                                                                                                                                                                                                                                                                                                                                                                 | CHU TOULOUSE                                                 | CNR Virus des Infections<br>Respiratoires - France<br>SUD                                         |                                                                                                                                                                                                                                                                                                                                                                                                                                                                                                                                                                                                                                                                                                                                                                                                                                                                | Antonin Bal; Bruno Lina; Gregory Destras; Gwendolynne Burfin; Hadrien Regue; Laurence Josset; Martine Valette; Quentin Semanas |
| EPI_ISL_4606820                                                                                                                                                                                                                                                                                                                                                                                                                                                                                                                                                                                                                                                                                                                                                                                                                                                                                                                                                                                                                                                                                                                                                                                                                                                                                                                                                                                                                                                                                                                                                                                                                                                                                                 | CLINIQUE<br>ESQUIROL-ST<br>HILAIRE                           | CNR Virus des Infections<br>Respiratoires - France<br>SUD                                         |                                                                                                                                                                                                                                                                                                                                                                                                                                                                                                                                                                                                                                                                                                                                                                                                                                                                | Antonin Bal; Bruno Lina; Gregory Destras; Gwendolynne Burfin; Hadrien Regue; Laurence Josset; Martine Valette; Quentin Semanas |
| EPI_ISL_4326128, EPI_ISL_4326129, EPI_ISL_4326131, EPI_ISL_4326306, EPI_ISL_4326318, EPI_ISL_4326335, EPI_ISL_4326341, EPI_ISL_4326352, EPI_ISL_4326470, EPI_ISL_4326473, EPI_ISL_4326476, EPI_ISL_4326482, EPI_ISL_4326499, EPI_ISL_4326629, EPI_ISL_4326643, EPI_ISL_4326646, EPI_ISL_4326649, EPI_ISL_4326655, EPI_ISL_4326658, EPI_ISL_4326677, EPI_ISL_4326680, EPI_ISL_4326683, EPI_ISL_4326685, EPI_ISL_4326740, EPI_ISL_4326744, EPI_ISL_4326747, EPI_ISL_4326750, EPI_ISL_4605037, EPI_ISL_4605577, EPI_ISL_4605578, EPI_ISL_4605676, EPI_ISL_4605802, EPI_ISL_4605955, EPI_ISL_4605956, EPI_ISL_4605957, EPI_ISL_4605958, EPI_ISL_4605959, EPI_ISL_4605962, EPI_ISL_4605970, EPI_ISL_4605977, EPI_ISL_4605994, EPI_ISL_4606001, EPI_ISL_4606002, EPI_ISL_4606003, EPI_ISL_4606004, EPI_ISL_4606007, EPI_ISL_4606008, EPI_ISL_4606009, EPI_ISL_4606010, EPI_ISL_4606014, EPI_ISL_4606015, EPI_ISL_4606064, EPI_ISL_4606112, EPI_ISL_4606161, EPI_ISL_4606181, EPI_ISL_4606212, EPI_ISL_4606217, EPI_ISL_4606289, EPI_ISL_4606411, EPI_ISL_4606416, EPI_ISL_4606439, EPI_ISL_4606444, EPI_ISL_4606445, EPI_ISL_4606505, EPI_ISL_4606646, EPI_ISL_4606653, EPI_ISL_4606935, EPI_ISL_4607142, EPI_ISL_4607143, EPI_ISL_4607144, EPI_ISL_4607145, EPI_ISL_4607146, EPI_ISL_4607147, EPI_ISL_4607148, EPI_ISL_4607149, EPI_ISL_4607150, EPI_ISL_4607151, EPI_ISL_4607152, EPI_ISL_4607153                                                                                                                                                                                                                                                                                                                   |                                                              |                                                                                                   | Antonin Bal; Bruno Lina; Gregory Destras; Gwendolynne Burfin; Hadrien Regue; Laurence Josset; Martine Valette; Quentin Semanas                                                                                                                                                                                                                                                                                                                                                                                                                                                                                                                                                                                                                                                                                                                                 |                                                                                                                                |
| see above                                                                                                                                                                                                                                                                                                                                                                                                                                                                                                                                                                                                                                                                                                                                                                                                                                                                                                                                                                                                                                                                                                                                                                                                                                                                                                                                                                                                                                                                                                                                                                                                                                                                                                       | CNR Virus des<br>Infections<br>Respiratoires -<br>France SUD | CNR Virus des Infections<br>Respiratoires - France<br>SUD                                         |                                                                                                                                                                                                                                                                                                                                                                                                                                                                                                                                                                                                                                                                                                                                                                                                                                                                |                                                                                                                                |
| EPI_ISL_4606129, EPI_ISL_4606141, EPI_ISL_4606143, EPI_ISL_4606144, EPI_ISL_4606145, EPI_ISL_4606146, EPI_ISL_4606147, EPI_ISL_4606148, EPI_ISL_4606149, EPI_ISL_4606150, EPI_ISL_4606151, EPI_ISL_4606152, EPI_ISL_4606153, EPI_ISL_4606155, EPI_ISL_4606156, EPI_ISL_4606157, EPI_ISL_4606158, EPI_ISL_4606159, EPI_ISL_4606160, EPI_ISL_4606162, EPI_ISL_4606601, EPI_ISL_4606603, EPI_ISL_4606607, EPI_ISL_4606609, EPI_ISL_4606612, EPI_ISL_4606614, EPI_ISL_4606617, EPI_ISL_4606634, EPI_ISL_4606636, EPI_ISL_4606637, EPI_ISL_4606639, EPI_ISL_4606640, EPI_ISL_4606642, EPI_ISL_4606643, EPI_ISL_4606644, EPI_ISL_4606645, EPI_ISL_4606651                                                                                                                                                                                                                                                                                                                                                                                                                                                                                                                                                                                                                                                                                                                                                                                                                                                                                                                                                                                                                                                             |                                                              |                                                                                                   |                                                                                                                                                                                                                                                                                                                                                                                                                                                                                                                                                                                                                                                                                                                                                                                                                                                                |                                                                                                                                |
| see above                                                                                                                                                                                                                                                                                                                                                                                                                                                                                                                                                                                                                                                                                                                                                                                                                                                                                                                                                                                                                                                                                                                                                                                                                                                                                                                                                                                                                                                                                                                                                                                                                                                                                                       | DYOMEDEA-<br>LABORATOIRE<br>DE LA<br>SAUVEGARDE              | CNR Virus des Infections<br>Respiratoires - France<br>SUD                                         |                                                                                                                                                                                                                                                                                                                                                                                                                                                                                                                                                                                                                                                                                                                                                                                                                                                                | Antonin Bal; Bruno Lina; Gregory Destras; Gwendolynne Burfin; Hadrien Regue; Laurence Josset; Martine Valette; Quentin Semanas |
| EPI_ISL_4606972                                                                                                                                                                                                                                                                                                                                                                                                                                                                                                                                                                                                                                                                                                                                                                                                                                                                                                                                                                                                                                                                                                                                                                                                                                                                                                                                                                                                                                                                                                                                                                                                                                                                                                 | EUROFINS<br>LABAZUR<br>RUMILLY                               | CNR Virus des Infections<br>Respiratoires - France<br>SUD                                         |                                                                                                                                                                                                                                                                                                                                                                                                                                                                                                                                                                                                                                                                                                                                                                                                                                                                | Antonin Bal; Bruno Lina; Gregory Destras; Gwendolynne Burfin; Hadrien Regue; Laurence Josset; Martine Valette; Quentin Semanas |
| EPI_ISL_4607088, EPI_ISL_4607090, EPI_ISL_4607092, EPI_ISL_4607095, EPI_ISL_4607101, EPI_ISL_4607102, EPI_ISL_4607103, EPI_ISL_4607104, EPI_ISL_4607107, EPI_ISL_4607108, EPI_ISL_4607110, EPI_ISL_4607113, EPI_ISL_4607115, EPI_ISL_4607116                                                                                                                                                                                                                                                                                                                                                                                                                                                                                                                                                                                                                                                                                                                                                                                                                                                                                                                                                                                                                                                                                                                                                                                                                                                                                                                                                                                                                                                                    | see above                                                    | EXALAB LE<br>HAILLAN                                                                              | CNR Virus des Infections<br>Respiratoires - France<br>SUD                                                                                                                                                                                                                                                                                                                                                                                                                                                                                                                                                                                                                                                                                                                                                                                                      | Antonin Bal; Bruno Lina; Gregory Destras; Gwendolynne Burfin; Hadrien Regue; Laurence Josset; Martine Valette; Quentin Semanas |
| EPI_ISL_4606379,<br>EPI_ISL_4606380,<br>EPI_ISL_4606382,<br>EPI_ISL_4606384                                                                                                                                                                                                                                                                                                                                                                                                                                                                                                                                                                                                                                                                                                                                                                                                                                                                                                                                                                                                                                                                                                                                                                                                                                                                                                                                                                                                                                                                                                                                                                                                                                     | HOPITAL ALBI                                                 | CNR Virus des Infections<br>Respiratoires - France<br>SUD                                         |                                                                                                                                                                                                                                                                                                                                                                                                                                                                                                                                                                                                                                                                                                                                                                                                                                                                | Antonin Bal; Bruno Lina; Gregory Destras; Gwendolynne Burfin; Hadrien Regue; Laurence Josset; Martine Valette; Quentin Semanas |
| EPI_ISL_4606767,<br>EPI_ISL_4606768,<br>EPI_ISL_4606769,<br>EPI_ISL_4606770,<br>EPI_ISL_4606771                                                                                                                                                                                                                                                                                                                                                                                                                                                                                                                                                                                                                                                                                                                                                                                                                                                                                                                                                                                                                                                                                                                                                                                                                                                                                                                                                                                                                                                                                                                                                                                                                 | HOPITAL DU<br>PAYS D'AUTAN                                   | CNR Virus des Infections<br>Respiratoires - France<br>SUD                                         |                                                                                                                                                                                                                                                                                                                                                                                                                                                                                                                                                                                                                                                                                                                                                                                                                                                                | Antonin Bal; Bruno Lina; Gregory Destras; Gwendolynne Burfin; Hadrien Regue; Laurence Josset; Martine Valette; Quentin Semanas |
| EPI_ISL_4606304,<br>EPI_ISL_4606305                                                                                                                                                                                                                                                                                                                                                                                                                                                                                                                                                                                                                                                                                                                                                                                                                                                                                                                                                                                                                                                                                                                                                                                                                                                                                                                                                                                                                                                                                                                                                                                                                                                                             | HOPITAL NORD<br>QUEST - CH<br>VILLEFRANCHE                   | CNR Virus des Infections<br>Respiratoires - France<br>SUD                                         |                                                                                                                                                                                                                                                                                                                                                                                                                                                                                                                                                                                                                                                                                                                                                                                                                                                                | Antonin Bal; Bruno Lina; Gregory Destras; Gwendolynne Burfin; Hadrien Regue; Laurence Josset; Martine Valette; Quentin Semanas |
| EPI_ISL_4607016                                                                                                                                                                                                                                                                                                                                                                                                                                                                                                                                                                                                                                                                                                                                                                                                                                                                                                                                                                                                                                                                                                                                                                                                                                                                                                                                                                                                                                                                                                                                                                                                                                                                                                 | HOPITAL<br>ROBERT BOULIN                                     | CNR Virus des Infections<br>Respiratoires - France<br>SUD                                         |                                                                                                                                                                                                                                                                                                                                                                                                                                                                                                                                                                                                                                                                                                                                                                                                                                                                | Antonin Bal; Bruno Lina; Gregory Destras; Gwendolynne Burfin; Hadrien Regue; Laurence Josset; Martine Valette; Quentin Semanas |
| EPI_ISL_4606944                                                                                                                                                                                                                                                                                                                                                                                                                                                                                                                                                                                                                                                                                                                                                                                                                                                                                                                                                                                                                                                                                                                                                                                                                                                                                                                                                                                                                                                                                                                                                                                                                                                                                                 | HOPITAUX<br>DROME NORD                                       | CNR Virus des Infections<br>Respiratoires - France<br>SUD                                         |                                                                                                                                                                                                                                                                                                                                                                                                                                                                                                                                                                                                                                                                                                                                                                                                                                                                | Antonin Bal; Bruno Lina; Gregory Destras; Gwendolynne Burfin; Hadrien Regue; Laurence Josset; Martine Valette; Quentin Semanas |
| EPI_ISL_4461359, EPI_ISL_4461360, EPI_ISL_4461361, EPI_ISL_4461425, EPI_ISL_4461502, EPI_ISL_4461503, EPI_ISL_4461514, EPI_ISL_4461525, EPI_ISL_4461528, EPI_ISL_4461529, EPI_ISL_4461629, EPI_ISL_4461645, EPI_ISL_4461646, EPI_ISL_4461647, EPI_ISL_4461648, EPI_ISL_4461649, EPI_ISL_4461691, EPI_ISL_4461728, EPI_ISL_4461735, EPI_ISL_4461799, EPI_ISL_4503773, EPI_ISL_4503774, EPI_ISL_4503775, EPI_ISL_4503776, EPI_ISL_4503804, EPI_ISL_4503805, EPI_ISL_4503806, EPI_ISL_4503855, EPI_ISL_4503856, EPI_ISL_4503857, EPI_ISL_4503858, EPI_ISL_4503912, EPI_ISL_4503913, EPI_ISL_4503914, EPI_ISL_4503915, EPI_ISL_4503916, EPI_ISL_4503917, EPI_ISL_4503918, EPI_ISL_4503919, EPI_ISL_4503920, EPI_ISL_4545352, EPI_ISL_4545361, EPI_ISL_4545362, EPI_ISL_4545363, EPI_ISL_4545364, EPI_ISL_4545365, EPI_ISL_4545366, EPI_ISL_4600584, EPI_ISL_4600585, EPI_ISL_4600586, EPI_ISL_4600587, EPI_ISL_4600588, EPI_ISL_4600633, EPI_ISL_4600634, EPI_ISL_4600635, EPI_ISL_4600636, EPI_ISL_4600637, EPI_ISL_4600638, EPI_ISL_4600639, EPI_ISL_4600640, EPI_ISL_4600642, EPI_ISL_4600651, EPI_ISL_4600652, EPI_ISL_4600684, EPI_ISL_4600716, EPI_ISL_4600717, EPI_ISL_4600729, EPI_ISL_4600730, EPI_ISL_4600731, EPI_ISL_4600732, EPI_ISL_4600748, EPI_ISL_4600750, EPI_ISL_4600765, EPI_ISL_4600767, EPI_ISL_4600768, EPI_ISL_4600769, EPI_ISL_4600772, EPI_ISL_4600785, EPI_ISL_4600786, EPI_ISL_4600787, EPI_ISL_4600788, EPI_ISL_4600789, EPI_ISL_4600790, EPI_ISL_4600792, EPI_ISL_4600811, EPI_ISL_4600812, EPI_ISL_4600941, EPI_ISL_4600951, EPI_ISL_4600958, EPI_ISL_4600959, EPI_ISL_4600960, EPI_ISL_4600986, EPI_ISL_4601008, EPI_ISL_4601009, EPI_ISL_4601068, EPI_ISL_4601074, EPI_ISL_4601113 |                                                              |                                                                                                   |                                                                                                                                                                                                                                                                                                                                                                                                                                                                                                                                                                                                                                                                                                                                                                                                                                                                |                                                                                                                                |
| see above                                                                                                                                                                                                                                                                                                                                                                                                                                                                                                                                                                                                                                                                                                                                                                                                                                                                                                                                                                                                                                                                                                                                                                                                                                                                                                                                                                                                                                                                                                                                                                                                                                                                                                       | Hospital                                                     | National Reference<br>Center for Viruses of<br>Respiratory Infections,<br>Institut Pasteur, Paris | Alexandra Ducancelle; Angela Brisebarre; Anne Cady; Axelle Paquin; Benjamin Maneglie; Camille Capel; Christine Febreau; Christophe Malabat; CléMence Guillaume; Corinne Maufrais; Cyril Hoche; CéLine Bressollette; Elena Guillotel; Emeline Riverain; Eric Farfour; Etienne Simon-Lorière; Facon; Frédéric Lemoine; Ghu Paris Psychiatrie; Haciba Moudjahed; Isabelle Gros; Isabelle Joly; José-Manuel Ramirez; Julien Fumey; L. Courdavault; Laura Djamdjian; Louise Lefrançois; LéA Pilorge; Mama Imene Fodil Pacha; Marianne Burgard; Marie-Christine Legrand-Quillien; Marion Barbet; Martine Escure; Maud Vanpeenre; Méline Bizard; Pierre Alain Billy; Pierre Patoz; Sandrine Castelein; Slim El Khiairi; Slim El-Khiairi; Sylvie Behillil; Sylvie Van der Werf; Thibaut Guinoisau; Valérie Serazin; Vincent Enouf; Vincent Thibaut; Zehaira Benseddick |                                                                                                                                |
| EPI_ISL_4600774                                                                                                                                                                                                                                                                                                                                                                                                                                                                                                                                                                                                                                                                                                                                                                                                                                                                                                                                                                                                                                                                                                                                                                                                                                                                                                                                                                                                                                                                                                                                                                                                                                                                                                 | Hôpital                                                      | National Reference<br>Center for Viruses of<br>Respiratory Infections,<br>Institut Pasteur, Paris | Angela Brisebarre; Camille Capel; Christophe Malabat; Corinne Maufrais; Etienne Simon-Lorière; Frédéric Lemoine; Julien Fumey; Louise Lefrançois; Marianne Burgard; Marion Barbet; Maud Vanpeenre; Méline Bizard; Slim El Khiairi; Sylvie Behillil; Sylvie Van der Werf; Vincent Enouf                                                                                                                                                                                                                                                                                                                                                                                                                                                                                                                                                                         |                                                                                                                                |
| EPI_ISL_4606019,                                                                                                                                                                                                                                                                                                                                                                                                                                                                                                                                                                                                                                                                                                                                                                                                                                                                                                                                                                                                                                                                                                                                                                                                                                                                                                                                                                                                                                                                                                                                                                                                                                                                                                | LABM CH                                                      | CNR Virus des Infections                                                                          |                                                                                                                                                                                                                                                                                                                                                                                                                                                                                                                                                                                                                                                                                                                                                                                                                                                                | Antonin Bal; Bruno Lina; Gregory Destras; Gwendolynne Burfin; Hadrien Regue; Laurence Josset; Martine Valette; Quentin Semanas |





EPI\_ISL\_4604588, EPI\_ISL\_4606650, EPI\_ISL\_4606652, EPI\_ISL\_4606664, EPI\_ISL\_4606683, EPI\_ISL\_4606715, EPI\_ISL\_4606717, EPI\_ISL\_4606718, EPI\_ISL\_4606719, EPI\_ISL\_4606720, EPI\_ISL\_4606721, EPI\_ISL\_4606722, EPI\_ISL\_4606724, EPI\_ISL\_4606728, EPI\_ISL\_4606729, EPI\_ISL\_4606730, EPI\_ISL\_4606731, EPI\_ISL\_4606732, EPI\_ISL\_4606733, EPI\_ISL\_4606734, EPI\_ISL\_4606737, EPI\_ISL\_4606738, EPI\_ISL\_4606763, EPI\_ISL\_4606774, EPI\_ISL\_4606783, EPI\_ISL\_4606787, EPI\_ISL\_4606797, EPI\_ISL\_4606832, EPI\_ISL\_4606837, EPI\_ISL\_4606840, EPI\_ISL\_4606848, EPI\_ISL\_4606863, EPI\_ISL\_4606919, EPI\_ISL\_4606921, EPI\_ISL\_4606923, EPI\_ISL\_4606937, EPI\_ISL\_4606938

see above      ORIAPOLE      CNR Virus des Infections Respiratoires - France SUD      Antonin Bal; Bruno Lina; Gregory Destras; Gwendolynne Burfin; Hadrien Regue; Laurence Josset; Martine Valette; Quentin Semanas

EPI\_ISL\_4606175      SCM B12      CNR Virus des Infections Respiratoires - France SUD      Antonin Bal; Bruno Lina; Gregory Destras; Gwendolynne Burfin; Hadrien Regue; Laurence Josset; Martine Valette; Quentin Semanas

EPI\_ISL\_4605823, EPI\_ISL\_4605825, EPI\_ISL\_4605828, EPI\_ISL\_4605831, EPI\_ISL\_4605835, EPI\_ISL\_4605837, EPI\_ISL\_4605838

see above      SYNLAB GASCOGNE      CNR Virus des Infections Respiratoires - France SUD      Antonin Bal; Bruno Lina; Gregory Destras; Gwendolynne Burfin; Hadrien Regue; Laurence Josset; Martine Valette; Quentin Semanas

EPI\_ISL\_4605608      SYNLAB PAYS DE SAVOIE      CNR Virus des Infections Respiratoires - France SUD      Antonin Bal; Bruno Lina; Gregory Destras; Gwendolynne Burfin; Hadrien Regue; Laurence Josset; Martine Valette; Quentin Semanas

EPI\_ISL\_4473234, EPI\_ISL\_4473235, EPI\_ISL\_4473236, EPI\_ISL\_4473237, EPI\_ISL\_4473238, EPI\_ISL\_4473239, EPI\_ISL\_4473240, EPI\_ISL\_4473241

see above      VIROLOGY LABORATORY-CHU NICE      VIROLOGY LABORATORY-CHU NICE      Aicha El Yakine; Geraldine Gonfrier; Jean Machowiak; Sebastien Vitale; Valerie Giordanengo; Virginie Flahou
