# Supplementary material for: SARS-COV-2 δ variant drives the pandemic in India and Europe via two subvariants
Source: bioRxiv or medRxiv preprint supplement (doi:10.1101/2021.10.16.21265096), 2021-10-20
Supplement: Supplementary file [file media-9.pdf]

EPI\_ISL\_4551987, EPI\_ISL\_4551988, EPI\_ISL\_4551989, EPI\_ISL\_4551997, EPI\_ISL\_4551998, EPI\_ISL\_4551999, EPI\_ISL\_4552000, EPI\_ISL\_4552001, EPI\_ISL\_4552002, EPI\_ISL\_4552003, EPI\_ISL\_4552004

see above

ZOTZ KLIMAS MVZ Düsseldorf-Centrum GbR ÜBAG für Labormedizin,  
Genetik, Zytologie, Pathologie

Center of Medical Microbiology, Virology, and Hospital Hygiene,  
University of Duesseldorf

Alexander Dilthey; Andreas Walker; Daniel Strelow; Jessica Nicolai; Jörg Timm; Katrin Hoffmann; Klaus Pfeffer; Lisanna Hülse; Malte Kohns Vasconcelos; Maximilian Damagnez; Nadine Lübke; Patrick Finzer; Rainer Zotz; Tobias Wienemann; Torsten Houwaart

EPI\_ISL\_4612067

amedes Medlab Arnold Analytik MVZ GmbH

Robert Koch Institute

EPI\_ISL\_4611875, EPI\_ISL\_4611880, EPI\_ISL\_4611890, EPI\_ISL\_4611892, EPI\_ISL\_4611893, EPI\_ISL\_4611898, EPI\_ISL\_4611899, EPI\_ISL\_4611908, EPI\_ISL\_4611910, EPI\_ISL\_4611913, EPI\_ISL\_4611915, EPI\_ISL\_4611916, EPI\_ISL\_4611918, EPI\_ISL\_4611919, EPI\_ISL\_4611920, EPI\_ISL\_4611921, EPI\_ISL\_4611922, EPI\_ISL\_4611923, EPI\_ISL\_4611924, EPI\_ISL\_4611925, EPI\_ISL\_4611926, EPI\_ISL\_4611927, EPI\_ISL\_4611928, EPI\_ISL\_4611929, EPI\_ISL\_4611930, EPI\_ISL\_4611931, EPI\_ISL\_4611932, EPI\_ISL\_4611933, EPI\_ISL\_4611934, EPI\_ISL\_4611935, EPI\_ISL\_4611936, EPI\_ISL\_4611937, EPI\_ISL\_4611938, EPI\_ISL\_4611939, EPI\_ISL\_4611940, EPI\_ISL\_4611941, EPI\_ISL\_4611942, EPI\_ISL\_4611943, EPI\_ISL\_4611944, EPI\_ISL\_4611945, EPI\_ISL\_4611946, EPI\_ISL\_4611947, EPI\_ISL\_4611953, EPI\_ISL\_4611955, EPI\_ISL\_4611956, EPI\_ISL\_4611957, EPI\_ISL\_4611959, EPI\_ISL\_4611966, EPI\_ISL\_4611967, EPI\_ISL\_4611969, EPI\_ISL\_4611973, EPI\_ISL\_4611974, EPI\_ISL\_4611976, EPI\_ISL\_4611977, EPI\_ISL\_4611978, EPI\_ISL\_4611979, EPI\_ISL\_4611980, EPI\_ISL\_4611982, EPI\_ISL\_4611983, EPI\_ISL\_4611984, EPI\_ISL\_4611985, EPI\_ISL\_4611986, EPI\_ISL\_4611995, EPI\_ISL\_4612011

see above

nordlab - Partnerschaftspraxis für Laboratoriumsmedizin

Robert Koch Institute
