# Supplementary material for: SARS-COV-2 δ variant drives the pandemic in India and Europe via two subvariants
Source: bioRxiv or medRxiv preprint supplement (doi:10.1101/2021.10.16.21265096), 2021-10-20
Supplement: Supplementary file [file media-10.pdf]

We gratefully acknowledge the following Authors from the Originating laboratories responsible for obtaining the specimens, as well as the Submitting laboratories where the genome data were generated and shared via GISAID, on which this research is based.

All Submitters of data may be contacted directly via [www.gisaid.org](http://www.gisaid.org)

Authors are sorted alphabetically.

| Accession ID                                                                                                                                                                                                                                                                                                                                                                                                                                                                                                                                                                                                                                                                                                            | Originating Laboratory                                                                    | Submitting Laboratory                                                                                          | Authors                                                                                                                                                                                                                                                                                                                                                                                                                                                 |                                                                                                                                                                                                                                                                                                                                                                                                                                                                         |
|-------------------------------------------------------------------------------------------------------------------------------------------------------------------------------------------------------------------------------------------------------------------------------------------------------------------------------------------------------------------------------------------------------------------------------------------------------------------------------------------------------------------------------------------------------------------------------------------------------------------------------------------------------------------------------------------------------------------------|-------------------------------------------------------------------------------------------|----------------------------------------------------------------------------------------------------------------|---------------------------------------------------------------------------------------------------------------------------------------------------------------------------------------------------------------------------------------------------------------------------------------------------------------------------------------------------------------------------------------------------------------------------------------------------------|-------------------------------------------------------------------------------------------------------------------------------------------------------------------------------------------------------------------------------------------------------------------------------------------------------------------------------------------------------------------------------------------------------------------------------------------------------------------------|
| EPI_ISL_4436491,<br>EPI_ISL_4436495,<br>EPI_ISL_4436550                                                                                                                                                                                                                                                                                                                                                                                                                                                                                                                                                                                                                                                                 | A.S.L. CITTA DI TORINO - OSPEDALE MAURIZIANO                                              | Fondazione del Piemonte per l'Oncologia IRCCS                                                                  | Antonino Sottile; Giorgio Giardina; Paola Marino; Silvia Brossa                                                                                                                                                                                                                                                                                                                                                                                         |                                                                                                                                                                                                                                                                                                                                                                                                                                                                         |
| EPI_ISL_4572067,<br>EPI_ISL_4572205                                                                                                                                                                                                                                                                                                                                                                                                                                                                                                                                                                                                                                                                                     | A.S.L. CUNEO 1                                                                            | Fondazione del Piemonte per l'Oncologia IRCCS                                                                  | Antonino Sottile; Giorgio Giardina; Paola Marino; Silvia Brossa                                                                                                                                                                                                                                                                                                                                                                                         |                                                                                                                                                                                                                                                                                                                                                                                                                                                                         |
| EPI_ISL_4606209                                                                                                                                                                                                                                                                                                                                                                                                                                                                                                                                                                                                                                                                                                         | ASTRALAB TASSIGNY                                                                         | CNR Virus des Infections Respiratoires - France SUD                                                            | Antonin Bal; Bruno Lina; Gregory Destras; Gwendolynne Burfin; Hadrien Regue; Laurence Josset; Martine Valette; Quentin Semanas                                                                                                                                                                                                                                                                                                                          |                                                                                                                                                                                                                                                                                                                                                                                                                                                                         |
| EPI_ISL_4557564                                                                                                                                                                                                                                                                                                                                                                                                                                                                                                                                                                                                                                                                                                         | AULSS 2 Marca Trevigiana                                                                  | Istituto Zooprofilattico Sperimentale delle Venezie                                                            | Adelaide Milani; Alessia Schivo; Alice Fusaro; Ambra Pastori; Annalisa Salvati; Antonia Ricci; Calogero Terregino; Edoardo Giussani; Elisa Palumbo; Erika Giorgia Quaranta; Isabella Monne; Luca Tassoni                                                                                                                                                                                                                                                |                                                                                                                                                                                                                                                                                                                                                                                                                                                                         |
| EPI_ISL_4571221,<br>EPI_ISL_4571230                                                                                                                                                                                                                                                                                                                                                                                                                                                                                                                                                                                                                                                                                     | AULSS 3 Venezia                                                                           | UOSD Genetica e Citogenetica - Azienda ULSS 3 Serenissima; Istituto Zooprofilattico Sperimentale delle Venezie | Adelaide Milani; Alessia Schivo; Alice Fusaro; Ambra Pastori; Annalisa Salvati; Antonia Ricci; Calogero Terregino; Claudia Perini; Edoardo Giussani; Elisa Palumbo; Elisa Squarcina; Erika Giorgia Quaranta; Isabella Monne; Laura Bevilacqua; Laura Squarzon; Luca Sorino; Luca Tassoni; Mosé Favarato                                                                                                                                                 |                                                                                                                                                                                                                                                                                                                                                                                                                                                                         |
| EPI_ISL_4571129                                                                                                                                                                                                                                                                                                                                                                                                                                                                                                                                                                                                                                                                                                         | AULSS 6 Euganea                                                                           | Istituto Zooprofilattico Sperimentale delle Venezie                                                            | Adelaide Milani; Alessia Schivo; Alice Fusaro; Ambra Pastori; Annalisa Salvati; Antonia Ricci; Calogero Terregino; Edoardo Giussani; Elisa Palumbo; Erika Giorgia Quaranta; Isabella Monne; Luca Tassoni                                                                                                                                                                                                                                                |                                                                                                                                                                                                                                                                                                                                                                                                                                                                         |
| EPI_ISL_4571275                                                                                                                                                                                                                                                                                                                                                                                                                                                                                                                                                                                                                                                                                                         | AULSS 9 Scaligera - Legnago                                                               | UOSD Genetica e Citogenetica - Azienda ULSS 3 Serenissima; Istituto Zooprofilattico Sperimentale delle Venezie | Adelaide Milani; Alessia Schivo; Alice Fusaro; Ambra Pastori; Annalisa Salvati; Antonia Ricci; Calogero Terregino; Claudia Perini; Edoardo Giussani; Elisa Palumbo; Elisa Squarcina; Erika Giorgia Quaranta; Isabella Monne; Laura Bevilacqua; Laura Squarzon; Luca Sorino; Luca Tassoni; Mosé Favarato                                                                                                                                                 |                                                                                                                                                                                                                                                                                                                                                                                                                                                                         |
| EPI_ISL_4606281                                                                                                                                                                                                                                                                                                                                                                                                                                                                                                                                                                                                                                                                                                         | AX BIO OCEAN                                                                              | CNR Virus des Infections Respiratoires - France SUD                                                            | Antonin Bal; Bruno Lina; Gregory Destras; Gwendolynne Burfin; Hadrien Regue; Laurence Josset; Martine Valette; Quentin Semanas                                                                                                                                                                                                                                                                                                                          |                                                                                                                                                                                                                                                                                                                                                                                                                                                                         |
| EPI_ISL_3933472, EPI_ISL_4205130, EPI_ISL_4213138, EPI_ISL_4345131, EPI_ISL_4345393, EPI_ISL_4364136, EPI_ISL_4364137, EPI_ISL_4364154, EPI_ISL_4364347, EPI_ISL_4364395, EPI_ISL_4468597, EPI_ISL_4468598, EPI_ISL_4468622, EPI_ISL_4545256, EPI_ISL_4545263, EPI_ISL_4545269, EPI_ISL_4545276, EPI_ISL_4545286, EPI_ISL_4545315, EPI_ISL_4601121, EPI_ISL_4601122, EPI_ISL_4601123, EPI_ISL_4601125, EPI_ISL_4601126, EPI_ISL_4601138                                                                                                                                                                                                                                                                                 |                                                                                           |                                                                                                                |                                                                                                                                                                                                                                                                                                                                                                                                                                                         |                                                                                                                                                                                                                                                                                                                                                                                                                                                                         |
| see above                                                                                                                                                                                                                                                                                                                                                                                                                                                                                                                                                                                                                                                                                                               | AZDelta                                                                                   | AZ Delta Medical Laboratories in Roeselare, Belgium                                                            | Dieter De Smet; Frederik Van Hoeck; Geert Martens; on behalf of AZ Delta COVID-19 Genomics core (member of Genomic surveillance of SARS-CoV-2 in Belgium network)                                                                                                                                                                                                                                                                                       |                                                                                                                                                                                                                                                                                                                                                                                                                                                                         |
| EPI_ISL_4494549                                                                                                                                                                                                                                                                                                                                                                                                                                                                                                                                                                                                                                                                                                         | Aegis Sciences Corporation                                                                | Centers for Disease Control and Prevention Division of Viral Diseases, Pathogen Discovery                      | Alec Vest; Benjamin Rambo-Martin; Christopher Gulvick; Clinton Paden; Cyndi Clark; Dakota Howard; Dhwanj Batra; Dillon Nali; Duncan MacCannell; Erisa Sula; Ethan Sanders; Holly Houdeshell; Jason Caravas; Kristine Lacey; Matthew Hardison; Matthew Scherer; Ola Kvalvaag; Patrick Campbell; Peter Cook; Rob Case; Scott Sammons; Shatavia Morrison; Shaun Westlund; Tymeckia Kendall; Victoria Caban Figueroa; Vikramsinha Ghorpade; Yvette Unoarumh |                                                                                                                                                                                                                                                                                                                                                                                                                                                                         |
| EPI_ISL_4479431,<br>EPI_ISL_4508183                                                                                                                                                                                                                                                                                                                                                                                                                                                                                                                                                                                                                                                                                     | Akershus University Hospital, Department for Microbiology and Infectious Disease Control  | Norwegian Institute of Public Health, Department of Virology                                                   | Atiya R Ali; Debech Nadia; Engebretsen Serina Beate; Garcia Lorente Ignacio; Hilde Elshaug; Hilde Vollan; Jon Bråte; Kamilla Heddeland Instefjord; Karoline Bragstad; Kathrine Stene-Johansen; Line Victoria Moen; Marie Paulsen Madsen; Olav Hungnes; Pedersen Benedikte Nevjen; Rasmus Riis Kopperud                                                                                                                                                  |                                                                                                                                                                                                                                                                                                                                                                                                                                                                         |
| EPI_ISL_4275365,<br>EPI_ISL_4275369,<br>EPI_ISL_4275393                                                                                                                                                                                                                                                                                                                                                                                                                                                                                                                                                                                                                                                                 | Algemeen Medisch Labo                                                                     | Labo Klinische Biologie, UZA                                                                                   | Basil Britto Xavier; Christine Lammens; Herman Goossens; Ines Verbesselt; Jasmine Coppens; Kathleen Holemans; Marie Le Mercier; Veerle Matheussens                                                                                                                                                                                                                                                                                                      |                                                                                                                                                                                                                                                                                                                                                                                                                                                                         |
| EPI_ISL_4303874                                                                                                                                                                                                                                                                                                                                                                                                                                                                                                                                                                                                                                                                                                         | Althai. Xarxa Assistencial Universitària de Manresa                                       | IrsiCaixa                                                                                                      | Antonia Flor; Bonaventura Clotet; Bonaventura Clotet Gloria Trujillo; Carolina Gonzalez-Fernandez; Eulalia Grau; Francesc Catala-Moll; Jaume Trapè; Marc Noguera-Julian; Maria Casadellà; Mariona Parera; Miquel Micó; Pilar Armengol; Rafel Perez Vidal; Roger Paredes                                                                                                                                                                                 |                                                                                                                                                                                                                                                                                                                                                                                                                                                                         |
| EPI_ISL_4510581,<br>EPI_ISL_4510582                                                                                                                                                                                                                                                                                                                                                                                                                                                                                                                                                                                                                                                                                     | Arlon                                                                                     | Plateforme de testing Namuroise                                                                                | Degossier Jonathan; Demars Aurore; Denis Olivier; Lesly Nyinkeu Kemamen; Maschietto Céline; Mullier François; Nicolas Gilliard; Nobis Chloé; Otto Gaetan                                                                                                                                                                                                                                                                                                |                                                                                                                                                                                                                                                                                                                                                                                                                                                                         |
| EPI_ISL_4284581                                                                                                                                                                                                                                                                                                                                                                                                                                                                                                                                                                                                                                                                                                         | Azienda Sanitaria dell'Alto Adige - Laboratorio Aziendale di Microbiologia e Virologia    | Azienda Sanitaria dell'Alto Adige                                                                              | Irene Bianconi                                                                                                                                                                                                                                                                                                                                                                                                                                          |                                                                                                                                                                                                                                                                                                                                                                                                                                                                         |
| EPI_ISL_4605315,<br>EPI_ISL_4605391                                                                                                                                                                                                                                                                                                                                                                                                                                                                                                                                                                                                                                                                                     | BIOLAB 33                                                                                 | CNR Virus des Infections Respiratoires - France SUD                                                            | Antonin Bal; Bruno Lina; Gregory Destras; Gwendolynne Burfin; Hadrien Regue; Laurence Josset; Martine Valette; Quentin Semanas                                                                                                                                                                                                                                                                                                                          |                                                                                                                                                                                                                                                                                                                                                                                                                                                                         |
| EPI_ISL_4620583,<br>EPI_ISL_4620769                                                                                                                                                                                                                                                                                                                                                                                                                                                                                                                                                                                                                                                                                     | Bayerisches Landesamt für Gesundheit und Lebensmittelsicherheit (LGL)                     | Robert Koch Institute                                                                                          |                                                                                                                                                                                                                                                                                                                                                                                                                                                         |                                                                                                                                                                                                                                                                                                                                                                                                                                                                         |
| EPI_ISL_4227834, EPI_ISL_4227940, EPI_ISL_4438023, EPI_ISL_4438090, EPI_ISL_4438197, EPI_ISL_4441321, EPI_ISL_4441327, EPI_ISL_4441427, EPI_ISL_4441486, EPI_ISL_4441694, EPI_ISL_4611443, EPI_ISL_4611487, EPI_ISL_4614388, EPI_ISL_4614628, EPI_ISL_4614651, EPI_ISL_4614684, EPI_ISL_4614786, EPI_ISL_4614869                                                                                                                                                                                                                                                                                                                                                                                                        | see above                                                                                 | Bioscientia Labor Wermsdorf                                                                                    | Robert Koch Institute                                                                                                                                                                                                                                                                                                                                                                                                                                   |                                                                                                                                                                                                                                                                                                                                                                                                                                                                         |
| EPI_ISL_4094623, EPI_ISL_4094869, EPI_ISL_4095063, EPI_ISL_4095123, EPI_ISL_4095222, EPI_ISL_4095234, EPI_ISL_4095276, EPI_ISL_4095392, EPI_ISL_4095660, EPI_ISL_4095689, EPI_ISL_4285096, EPI_ISL_4285289, EPI_ISL_4285293, EPI_ISL_4285569, EPI_ISL_4285784, EPI_ISL_4286299, EPI_ISL_4286361, EPI_ISL_4286370, EPI_ISL_4286440, EPI_ISL_4304090, EPI_ISL_4304254, EPI_ISL_4304603, EPI_ISL_4304685, EPI_ISL_4454435, EPI_ISL_4454719, EPI_ISL_4487945, EPI_ISL_4487954, EPI_ISL_4488086, EPI_ISL_4497322, EPI_ISL_4516605, EPI_ISL_4516858, EPI_ISL_4516890, EPI_ISL_4516906, EPI_ISL_4517034, EPI_ISL_4517431, EPI_ISL_4517481, EPI_ISL_4517555, EPI_ISL_4517564, EPI_ISL_4517566, EPI_ISL_4517668, EPI_ISL_4517722 | see above                                                                                 | Broad Institute Clinical Research Sequencing Platform                                                          | Infectious Disease Program, Broad Institute of Harvard and MIT                                                                                                                                                                                                                                                                                                                                                                                          | Adams, G.; B.L.; B.W.; Bauer, M.; Birren; Blumenstiel, B.; Brown, C.; Carter, A.; Chaluvaadi, S.; D.J.; DeFelice, M.; DeRuff, K.; Dodge, S.; Gabriel, S.; Gallagher, G.; Gladden-Young, A.; Granger, B.; J.E.; K.J.; Lagerborg, K.; Larkin, K.; Lee, M.; Lemieux; Lennon, N.; Loreth, C.; Madoff, L.; McGovern, S.; Meldrim, J.; Normandin, E.; P.C.; Park; Pearlman, L.; Reilly, S.; Rudy, M.; Sabeti; Siddle; Smole, S.; Tomkins-Tinch, C.; Vicente, G.; and MacInnis |
| EPI_ISL_4539760                                                                                                                                                                                                                                                                                                                                                                                                                                                                                                                                                                                                                                                                                                         | C.H. LE DAMANY LANNION-TRESTEL                                                            | CHU Pontchaillou                                                                                               | DE TAYRAC Marie; DENOUAL Florent; DUFOUR Marie Jose; ETCHEVERRY Amandine; FEBREAU Christine; GALIBERT Marie Dominique; GROLHIER Claire; JAGLINE Steven; PRONIER Charlotte; QUENET Benjamin; SASSI Mohamed; THIBAUT Vincent                                                                                                                                                                                                                              |                                                                                                                                                                                                                                                                                                                                                                                                                                                                         |
| EPI_ISL_4440511,<br>EPI_ISL_4440560                                                                                                                                                                                                                                                                                                                                                                                                                                                                                                                                                                                                                                                                                     | CENTOGÈNE Frankfurt Laboratory; Niederfassung Industriepark Höchst                        | Robert Koch Institute                                                                                          |                                                                                                                                                                                                                                                                                                                                                                                                                                                         |                                                                                                                                                                                                                                                                                                                                                                                                                                                                         |
| EPI_ISL_4605009,<br>EPI_ISL_4605418,<br>EPI_ISL_4605427,<br>EPI_ISL_4605458,<br>EPI_ISL_4605484,<br>EPI_ISL_4606741                                                                                                                                                                                                                                                                                                                                                                                                                                                                                                                                                                                                     | CERBALLIANCE OCCITANIE                                                                    | CNR Virus des Infections Respiratoires - France SUD                                                            | Antonin Bal; Bruno Lina; Gregory Destras; Gwendolynne Burfin; Hadrien Regue; Laurence Josset; Martine Valette; Quentin Semanas                                                                                                                                                                                                                                                                                                                          |                                                                                                                                                                                                                                                                                                                                                                                                                                                                         |
| EPI_ISL_4127720,<br>EPI_ISL_4254807,<br>EPI_ISL_4254808,<br>EPI_ISL_4254809                                                                                                                                                                                                                                                                                                                                                                                                                                                                                                                                                                                                                                             | CHM - SITE CHR                                                                            | Institut de Pathologie et Genetique (IPG)                                                                      | Jérémie Gras; Pascale Hilbert                                                                                                                                                                                                                                                                                                                                                                                                                           |                                                                                                                                                                                                                                                                                                                                                                                                                                                                         |
| EPI_ISL_4413130,<br>EPI_ISL_4632210                                                                                                                                                                                                                                                                                                                                                                                                                                                                                                                                                                                                                                                                                     | CHUV                                                                                      | Laboratory of genomics and metagenomics                                                                        | Claire Bertelli; Damien Jacot; Gilbert Greub; Sébastien Aebly; Trestan Pillonel                                                                                                                                                                                                                                                                                                                                                                         |                                                                                                                                                                                                                                                                                                                                                                                                                                                                         |
| EPI_ISL_4201559                                                                                                                                                                                                                                                                                                                                                                                                                                                                                                                                                                                                                                                                                                         | CLILAB                                                                                    | Microbiology Department                                                                                        | Aida Gonzalez-Diaz; Carmen Ardanuy; Jordi Camara; Jordi Niubó; Laura Calatayud; M Angeles Dominguez; Sara Marti; Yolanda Hernandez                                                                                                                                                                                                                                                                                                                      |                                                                                                                                                                                                                                                                                                                                                                                                                                                                         |
| EPI_ISL_4325390,<br>EPI_ISL_4606010                                                                                                                                                                                                                                                                                                                                                                                                                                                                                                                                                                                                                                                                                     | CNR Virus des Infections Respiratoires - France SUD                                       | CNR Virus des Infections Respiratoires - France SUD                                                            | Antonin Bal; Bruno Lina; Gregory Destras; Gwendolynne Burfin; Hadrien Regue; Laurence Josset; Martine Valette; Quentin Semanas                                                                                                                                                                                                                                                                                                                          |                                                                                                                                                                                                                                                                                                                                                                                                                                                                         |
| EPI_ISL_4551949,<br>EPI_ISL_4551950,<br>EPI_ISL_4551954,<br>EPI_ISL_4551955                                                                                                                                                                                                                                                                                                                                                                                                                                                                                                                                                                                                                                             | Center of Medical Microbiology, Virology, and Hospital Hygiene, University of Duesseldorf | Center of Medical Microbiology, Virology, and Hospital Hygiene, University of Duesseldorf                      | Alexander Dilthey; Andreas Walker; Daniel Strelow; Jessica Nicolai; Jörg Timm; Klaus Pfeffer; Lisanna Hülse; Malte Kohns Vasconcelos; Maximilian Damagnez; Nadine Lübke; Tobias Wienemann; Torsten Houwaart                                                                                                                                                                                                                                             |                                                                                                                                                                                                                                                                                                                                                                                                                                                                         |
| EPI_ISL_4078034                                                                                                                                                                                                                                                                                                                                                                                                                                                                                                                                                                                                                                                                                                         | Centre Hospitalier Universitaire Clermont-Ferrand                                         | CHU Clermont-Ferrand, service de virologie                                                                     | Bisseux Maxime; Combes Patricia; Henquell Cécile; Mirand Audrey                                                                                                                                                                                                                                                                                                                                                                                         |                                                                                                                                                                                                                                                                                                                                                                                                                                                                         |
| EPI_ISL_4505601                                                                                                                                                                                                                                                                                                                                                                                                                                                                                                                                                                                                                                                                                                         | Centrum voor Medische Analyse                                                             | Labo Klinische Biologie, UZA                                                                                   | Basil Britto Xavier; Christine Lammens; Herman Goossens; Ines Verbesselt; Jasmine Coppens; Kathleen Holemans; Marie Le Mercier; Veerle Matheussens                                                                                                                                                                                                                                                                                                      |                                                                                                                                                                                                                                                                                                                                                                                                                                                                         |
| EPI_ISL_4131379, EPI_ISL_4131439, EPI_ISL_4131455, EPI_ISL_4131470, EPI_ISL_4521282, EPI_ISL_4521300, EPI_ISL_4521318, EPI_ISL_4521319, EPI_ISL_4521335, EPI_ISL_4521337, EPI_ISL_4521340, EPI_ISL_4521386                                                                                                                                                                                                                                                                                                                                                                                                                                                                                                              | see above                                                                                 | Clinical Microbiology, Infection Prevention and Control                                                        | Section for Molecular Diagnostics                                                                                                                                                                                                                                                                                                                                                                                                                       | Björn Hallström; Jonas Björkman                                                                                                                                                                                                                                                                                                                                                                                                                                         |
| EPI_ISL_4450886                                                                                                                                                                                                                                                                                                                                                                                                                                                                                                                                                                                                                                                                                                         | Clinical Virology                                                                         | Clinical Bacteriology                                                                                          | Adrian Egli; Alfredo Mari; Fanny Wegner; Hans Hirsch; Helena MB Seth-Smith; Julia Bielicki; Karoline Leuzinger; Manuel Battegay; Tim Rolf                                                                                                                                                                                                                                                                                                               |                                                                                                                                                                                                                                                                                                                                                                                                                                                                         |
| EPI_ISL_4492600                                                                                                                                                                                                                                                                                                                                                                                                                                                                                                                                                                                                                                                                                                         | Clinique Notre Dame à Hermaille                                                           | GIGA Medical Genomics                                                                                          | Bouchra Boujemla; Claire Gourzonès; Cécile Meex; Keith Durkin; Laurent Gillet; Maria Artesi; Marie-Pierre Hayette; Nadine Cambisano; Nathalie Renotte; Olivier Ek; Sébastien Bontems; Vincent Bours                                                                                                                                                                                                                                                     |                                                                                                                                                                                                                                                                                                                                                                                                                                                                         |



|                                                                                                                                                                                                                                                                                                                                                                                                                                                          |                                                                                                 |                                                                                                 |                                                                                                                                                                                                                                                                                                                                                                                                                                                                                                                                                                                                                                                                                                                                                                                                                                                                                                                                                                                                                                                                  |
|----------------------------------------------------------------------------------------------------------------------------------------------------------------------------------------------------------------------------------------------------------------------------------------------------------------------------------------------------------------------------------------------------------------------------------------------------------|-------------------------------------------------------------------------------------------------|-------------------------------------------------------------------------------------------------|------------------------------------------------------------------------------------------------------------------------------------------------------------------------------------------------------------------------------------------------------------------------------------------------------------------------------------------------------------------------------------------------------------------------------------------------------------------------------------------------------------------------------------------------------------------------------------------------------------------------------------------------------------------------------------------------------------------------------------------------------------------------------------------------------------------------------------------------------------------------------------------------------------------------------------------------------------------------------------------------------------------------------------------------------------------|
| EPI_ISL_4578048                                                                                                                                                                                                                                                                                                                                                                                                                                          | Vall d'Hebron Institut de Recerca Hospital Virgen De Altagracia                                 | Vall d'Hebron Institut de Recerca Hospital General Universitario de Ciudad Real                 | Cristina Colmenarejo; José Martínez-Alarcón; Lidia García-Agudo; Marta Torres-Narbona; Soledad Illescas Fernández-Bermejo                                                                                                                                                                                                                                                                                                                                                                                                                                                                                                                                                                                                                                                                                                                                                                                                                                                                                                                                        |
| EPI_ISL_4611670, EPI_ISL_4611682                                                                                                                                                                                                                                                                                                                                                                                                                         | IMD Labor Frankfurt                                                                             | Robert Koch Institute                                                                           |                                                                                                                                                                                                                                                                                                                                                                                                                                                                                                                                                                                                                                                                                                                                                                                                                                                                                                                                                                                                                                                                  |
| EPI_ISL_4204707                                                                                                                                                                                                                                                                                                                                                                                                                                          | Imelda Ziekenhuis                                                                               | Imelda Ziekenhuis                                                                               | Dagmar Obbels; Hanne Valgaeren; Johan Frans                                                                                                                                                                                                                                                                                                                                                                                                                                                                                                                                                                                                                                                                                                                                                                                                                                                                                                                                                                                                                      |
| EPI_ISL_4632119                                                                                                                                                                                                                                                                                                                                                                                                                                          | Institut de Chimie Clinique Sarl                                                                | Laboratory of genomics and metagenomics                                                         | Claire Bertelli; Damien Jacot; Gilbert Greub; Sébastien Aeby; Trestan Pillonel                                                                                                                                                                                                                                                                                                                                                                                                                                                                                                                                                                                                                                                                                                                                                                                                                                                                                                                                                                                   |
| EPI_ISL_4269656, EPI_ISL_4269700, EPI_ISL_4486270, EPI_ISL_4625133                                                                                                                                                                                                                                                                                                                                                                                       | Institute for Infectious Diseases                                                               | Institute for Infectious Diseases, University of Bern                                           | Alban Ramette; Christian Baumann; Cora Sägesser; Franziska Suter-Riniker; Loïc Borcard; Miguel A Terrazos Miani; Nicole Liechti; Pascal Bittel; Peter Keller; Sonja Gempeler; Stefan Neuwenschwander; Stephen L Leib                                                                                                                                                                                                                                                                                                                                                                                                                                                                                                                                                                                                                                                                                                                                                                                                                                             |
| EPI_ISL_4185848, EPI_ISL_4185850, EPI_ISL_4185853, EPI_ISL_4185925, EPI_ISL_4185961, EPI_ISL_4186072, EPI_ISL_4186111, EPI_ISL_4270069, EPI_ISL_4270074, EPI_ISL_4270075, EPI_ISL_4634191                                                                                                                                                                                                                                                                | see above                                                                                       | Jessa                                                                                           | Marijke Raymaekers et al. on behalf of the Jessa_cmdLab; Severine Berden et al. on behalf of the Jessa_cmdLab                                                                                                                                                                                                                                                                                                                                                                                                                                                                                                                                                                                                                                                                                                                                                                                                                                                                                                                                                    |
| EPI_ISL_4365231, EPI_ISL_4365236, EPI_ISL_4365237, EPI_ISL_4365239, EPI_ISL_4365240, EPI_ISL_4365255, EPI_ISL_4365258, EPI_ISL_4365294, EPI_ISL_4365412, EPI_ISL_4572020, EPI_ISL_4572041                                                                                                                                                                                                                                                                | see above                                                                                       | KU Leuven, Rega Institute, Clinical and Epidemiological Virology                                | Bert Vanmechelen; Joan Marti-Carreras; Piet Maes; Tony Wawina-Bokalanga                                                                                                                                                                                                                                                                                                                                                                                                                                                                                                                                                                                                                                                                                                                                                                                                                                                                                                                                                                                          |
| EPI_ISL_4175151, EPI_ISL_4175152, EPI_ISL_4330413                                                                                                                                                                                                                                                                                                                                                                                                        | Karolinska University Hospital Huddinge                                                         | Karolinska University Hospital                                                                  | Annelie Bjerkner; Isak Sylvén; Jan Albert; Karolina Ininbergs; Lina Guerra Blomqvist; Lynda Eneh; Martin Ekman; Martina Wahlund; Robert Dyrdad; Sandra Brodsson; Tanja Normark; Tobias Allander; Valtteri Wirta; Zhibing Yun                                                                                                                                                                                                                                                                                                                                                                                                                                                                                                                                                                                                                                                                                                                                                                                                                                     |
| EPI_ISL_4505720, EPI_ISL_4505721, EPI_ISL_4505735                                                                                                                                                                                                                                                                                                                                                                                                        | Klinisch Laboratorium ZNA                                                                       | Klinisch Laboratorium ZNA                                                                       | Verstrepen et al.                                                                                                                                                                                                                                                                                                                                                                                                                                                                                                                                                                                                                                                                                                                                                                                                                                                                                                                                                                                                                                                |
| EPI_ISL_4606836, EPI_ISL_4606839, EPI_ISL_4606851, EPI_ISL_4606900                                                                                                                                                                                                                                                                                                                                                                                       | LABORATOIRE ANABIO BERGSON                                                                      | CNR Virus des Infections Respiratoires - France SUD                                             | Antonin Bal; Bruno Lina; Gregory Destras; Gwendolynne Burfin; Hadrien Regue; Laurence Josset; Martine Valette; Quentin Semanas                                                                                                                                                                                                                                                                                                                                                                                                                                                                                                                                                                                                                                                                                                                                                                                                                                                                                                                                   |
| EPI_ISL_4605757, EPI_ISL_4605817                                                                                                                                                                                                                                                                                                                                                                                                                         | LABORATOIRE BIOESTEREL                                                                          | CNR Virus des Infections Respiratoires - France SUD                                             | Antonin Bal; Bruno Lina; Gregory Destras; Gwendolynne Burfin; Hadrien Regue; Laurence Josset; Martine Valette; Quentin Semanas                                                                                                                                                                                                                                                                                                                                                                                                                                                                                                                                                                                                                                                                                                                                                                                                                                                                                                                                   |
| EPI_ISL_4605770, EPI_ISL_4605803, EPI_ISL_4605813, EPI_ISL_4605851, EPI_ISL_4605856, EPI_ISL_4605866, EPI_ISL_4606692                                                                                                                                                                                                                                                                                                                                    | see above                                                                                       | LABORATOIRE CERBALLIANCE PLT VILLON                                                             | Antonin Bal; Bruno Lina; Gregory Destras; Gwendolynne Burfin; Hadrien Regue; Laurence Josset; Martine Valette; Quentin Semanas                                                                                                                                                                                                                                                                                                                                                                                                                                                                                                                                                                                                                                                                                                                                                                                                                                                                                                                                   |
| EPI_ISL_4606759                                                                                                                                                                                                                                                                                                                                                                                                                                          | LABORATOIRE FORTE BIO DAX                                                                       | CNR Virus des Infections Respiratoires - France SUD                                             | Antonin Bal; Bruno Lina; Gregory Destras; Gwendolynne Burfin; Hadrien Regue; Laurence Josset; Martine Valette; Quentin Semanas                                                                                                                                                                                                                                                                                                                                                                                                                                                                                                                                                                                                                                                                                                                                                                                                                                                                                                                                   |
| EPI_ISL_4606990, EPI_ISL_4606994, EPI_ISL_4607017                                                                                                                                                                                                                                                                                                                                                                                                        | LABORATOIRE LABAZUR                                                                             | CNR Virus des Infections Respiratoires - France SUD                                             | Antonin Bal; Bruno Lina; Gregory Destras; Gwendolynne Burfin; Hadrien Regue; Laurence Josset; Martine Valette; Quentin Semanas                                                                                                                                                                                                                                                                                                                                                                                                                                                                                                                                                                                                                                                                                                                                                                                                                                                                                                                                   |
| EPI_ISL_4606061, EPI_ISL_4606065, EPI_ISL_4606075, EPI_ISL_4606077                                                                                                                                                                                                                                                                                                                                                                                       | LABORATOIRE LBA JAYAN AGEN                                                                      | CNR Virus des Infections Respiratoires - France SUD                                             | Antonin Bal; Bruno Lina; Gregory Destras; Gwendolynne Burfin; Hadrien Regue; Laurence Josset; Martine Valette; Quentin Semanas                                                                                                                                                                                                                                                                                                                                                                                                                                                                                                                                                                                                                                                                                                                                                                                                                                                                                                                                   |
| EPI_ISL_4605665                                                                                                                                                                                                                                                                                                                                                                                                                                          | LABORATOIRE UNILIANS DECINES                                                                    | CNR Virus des Infections Respiratoires - France SUD                                             | Antonin Bal; Bruno Lina; Gregory Destras; Gwendolynne Burfin; Hadrien Regue; Laurence Josset; Martine Valette; Quentin Semanas                                                                                                                                                                                                                                                                                                                                                                                                                                                                                                                                                                                                                                                                                                                                                                                                                                                                                                                                   |
| EPI_ISL_4445602, EPI_ISL_4608964, EPI_ISL_4608994, EPI_ISL_4609014, EPI_ISL_4610987, EPI_ISL_4610997, EPI_ISL_4611044, EPI_ISL_4611045, EPI_ISL_4611143, EPI_ISL_4611185, EPI_ISL_4616773, EPI_ISL_4616801, EPI_ISL_4616864, EPI_ISL_4618249, EPI_ISL_4619228                                                                                                                                                                                            | see above                                                                                       | LADR Zentrallabor DR. Kramer & Kollegen Geesthacht                                              | Robert Koch Institute                                                                                                                                                                                                                                                                                                                                                                                                                                                                                                                                                                                                                                                                                                                                                                                                                                                                                                                                                                                                                                            |
| EPI_ISL_4606523                                                                                                                                                                                                                                                                                                                                                                                                                                          | LBM DYNABIO CARREAU                                                                             | CNR Virus des Infections Respiratoires - France SUD                                             | Antonin Bal; Bruno Lina; Gregory Destras; Gwendolynne Burfin; Hadrien Regue; Laurence Josset; Martine Valette; Quentin Semanas                                                                                                                                                                                                                                                                                                                                                                                                                                                                                                                                                                                                                                                                                                                                                                                                                                                                                                                                   |
| EPI_ISL_4606532, EPI_ISL_4606534                                                                                                                                                                                                                                                                                                                                                                                                                         | LBM TRONQUIERES                                                                                 | CNR Virus des Infections Respiratoires - France SUD                                             | Antonin Bal; Bruno Lina; Gregory Destras; Gwendolynne Burfin; Hadrien Regue; Laurence Josset; Martine Valette; Quentin Semanas                                                                                                                                                                                                                                                                                                                                                                                                                                                                                                                                                                                                                                                                                                                                                                                                                                                                                                                                   |
| EPI_ISL_4053034                                                                                                                                                                                                                                                                                                                                                                                                                                          | LKO                                                                                             | Jessa                                                                                           | Marijke Raymaekers et al. on behalf of the Jessa_cmdLab                                                                                                                                                                                                                                                                                                                                                                                                                                                                                                                                                                                                                                                                                                                                                                                                                                                                                                                                                                                                          |
| EPI_ISL_4525778                                                                                                                                                                                                                                                                                                                                                                                                                                          | Lab. Microbiologia e Virologia Cotugno A.O. dei Colli                                           | TIGEM                                                                                           | Antonio Grimaldi Patrizia Annunziata Francesco Panariello Claudia Tiberio Teresa Giuliano Valentina Bouche Chiara Colantuono Lucio Di Filippo Anna Manfredi Marcello Salvi Antonio Limone Luigi Atripaldi Andrea Ballabio Davide Cacchiarelli                                                                                                                                                                                                                                                                                                                                                                                                                                                                                                                                                                                                                                                                                                                                                                                                                    |
| EPI_ISL_4224792, EPI_ISL_4624787                                                                                                                                                                                                                                                                                                                                                                                                                         | LabKom - Labor Augsburg MVZ GmbH                                                                | Robert Koch Institute                                                                           |                                                                                                                                                                                                                                                                                                                                                                                                                                                                                                                                                                                                                                                                                                                                                                                                                                                                                                                                                                                                                                                                  |
| EPI_ISL_4614785, EPI_ISL_4614830, EPI_ISL_4614931                                                                                                                                                                                                                                                                                                                                                                                                        | LabKom - Labor Mainz MVZ GmbH                                                                   | Robert Koch Institute                                                                           |                                                                                                                                                                                                                                                                                                                                                                                                                                                                                                                                                                                                                                                                                                                                                                                                                                                                                                                                                                                                                                                                  |
| EPI_ISL_4614594                                                                                                                                                                                                                                                                                                                                                                                                                                          | LabKom - MVZ Labor Bochum MLB GmbH                                                              | Robert Koch Institute                                                                           |                                                                                                                                                                                                                                                                                                                                                                                                                                                                                                                                                                                                                                                                                                                                                                                                                                                                                                                                                                                                                                                                  |
| EPI_ISL_4461444, EPI_ISL_4461654, EPI_ISL_4461709, EPI_ISL_4503745, EPI_ISL_4503760, EPI_ISL_4503762, EPI_ISL_4503833, EPI_ISL_4503879, EPI_ISL_4503881, EPI_ISL_4503931, EPI_ISL_4600659, EPI_ISL_4600670, EPI_ISL_4600671, EPI_ISL_4600724, EPI_ISL_4600821, EPI_ISL_4600844, EPI_ISL_4600846, EPI_ISL_4601056                                                                                                                                         | see above                                                                                       | Labo Analyses Med                                                                               | National Reference Center for Viruses of Respiratory Infections, Institut Pasteur, Paris                                                                                                                                                                                                                                                                                                                                                                                                                                                                                                                                                                                                                                                                                                                                                                                                                                                                                                                                                                         |
| EPI_ISL_4310262                                                                                                                                                                                                                                                                                                                                                                                                                                          | Labor Berlin Charité Vivantes GmbH / Institut für Virologie                                     | Charité Universitätsmedizin Berlin, Institut für Virologie/Labor Berlin                         | Barbara Mühlemann; Christian Drostén; Christine Stephan; Peter Menzel; Rolf Schwarzer; Terry Jones; Victor M Corman                                                                                                                                                                                                                                                                                                                                                                                                                                                                                                                                                                                                                                                                                                                                                                                                                                                                                                                                              |
| EPI_ISL_4230901, EPI_ISL_4230978, EPI_ISL_4231109, EPI_ISL_4231129, EPI_ISL_4231383, EPI_ISL_4231422, EPI_ISL_4444613, EPI_ISL_4444710, EPI_ISL_4444714, EPI_ISL_4444754, EPI_ISL_4444819, EPI_ISL_4444855, EPI_ISL_4444864, EPI_ISL_4444998, EPI_ISL_4609282, EPI_ISL_4609299, EPI_ISL_4609388, EPI_ISL_4609395, EPI_ISL_4609404, EPI_ISL_4609423, EPI_ISL_4609465, EPI_ISL_4609527, EPI_ISL_4614039, EPI_ISL_4614080, EPI_ISL_4614206, EPI_ISL_4614209 | see above                                                                                       | Labor Dr. Wisplinghoff - Köln                                                                   | Robert Koch Institute                                                                                                                                                                                                                                                                                                                                                                                                                                                                                                                                                                                                                                                                                                                                                                                                                                                                                                                                                                                                                                            |
| EPI_ISL_4224309, EPI_ISL_4437713, EPI_ISL_4437730, EPI_ISL_4439885, EPI_ISL_4442472, EPI_ISL_4446545, EPI_ISL_4611798, EPI_ISL_4612193, EPI_ISL_4615093, EPI_ISL_4615096, EPI_ISL_4615187, EPI_ISL_4615202, EPI_ISL_4615209, EPI_ISL_4615219                                                                                                                                                                                                             | see above                                                                                       | Labor Mönchengladbach MVZ Dr. Stein + Kollegen GbR                                              | Robert Koch Institute                                                                                                                                                                                                                                                                                                                                                                                                                                                                                                                                                                                                                                                                                                                                                                                                                                                                                                                                                                                                                                            |
| EPI_ISL_4617034                                                                                                                                                                                                                                                                                                                                                                                                                                          | Laborarztpraxis Osnabrück                                                                       | Robert Koch Institute                                                                           |                                                                                                                                                                                                                                                                                                                                                                                                                                                                                                                                                                                                                                                                                                                                                                                                                                                                                                                                                                                                                                                                  |
| EPI_ISL_4543386, EPI_ISL_4545397, EPI_ISL_4634213                                                                                                                                                                                                                                                                                                                                                                                                        | Laboratori de Referencia de Catalunya                                                           | Laboratori de Referencia de Catalunya                                                           | Bellosillo B.; Canal M.; Hernandez J.; Padilla E.; Ramirez A.; Vilas A.                                                                                                                                                                                                                                                                                                                                                                                                                                                                                                                                                                                                                                                                                                                                                                                                                                                                                                                                                                                          |
| EPI_ISL_4483618, EPI_ISL_4538746                                                                                                                                                                                                                                                                                                                                                                                                                         | Laboratory Corporation of America                                                               | Centers for Disease Control and Prevention Division of Viral Diseases, Pathogen Discovery       | Amanda Douglas; Amanda Suchanek; Andrea Throop; Ayla Burns; Benjamin Rambo-Martin; Bobbi Croy; Brian Krueger; Brian Norvell; Christopher Gulvick; Christos Petropoulos; Clinton Paden; Craig Lukasik; Dakota Howard; Debbie Boles; Dhvani Batra; Duncan MacCannell; Eyad Almasri; Goran Stevovic; Howard Engler; Hrushikesh Deshmukh; Jake Humphrey; Jana Schroth; Jason Caravas; Joe Voshell; John Pruitt; Jonathan Williams; Kimberly Wagner; Kristine Lacey; Lax Iyer; Lisa Pfefferle; Lyndon Tilson; Manoj Jain; Marcia Eisenberg; Mary Cristobal; Mary Williamson; Matthew Robinson; Matthew Schmerer; Michael Levandowski; Mike Sapeta; Mindy Nye; Minoo Agarwal; Mohan Kollu; Nuthwin Charoensri; Oren Cohen; Peter Cook; Prashant Gupta; Qian Zeng; Rama Ghatti; Scott Parker; Scott Ryan; Scott Sammons; Shatavia Morrison; Stanley Letovsky; Steven Ragan; Suresh Selvaraju; Susan Countryman; Susan Hicks; Suzanne Dale; Thomas Urban; Tim Kuphal; Tricia Zwiefelhofer; Tymecia Kendall; Victoria Caban Figueroa; Vincent Drouillon; Yvette Unoarumhi |
| EPI_ISL_4312406, EPI_ISL_4312861, EPI_ISL_4313301, EPI_ISL_4313638, EPI_ISL_4314142, EPI_ISL_4314645                                                                                                                                                                                                                                                                                                                                                     | Laboratory of Microbiology, ASST Ospedale di Circolo, Varese viale borri 57 21100 Varese, Italy | Laboratory of Microbiology, ASST Ospedale di Circolo, Varese viale borri 57 21100 Varese, Italy | Andreina Baj; Angelo Genoni; Daniela Dalla Gasperina; Daniele Focosi; Fabrizio Maggi; Federica Novazzi; Francesca Dragofferrante                                                                                                                                                                                                                                                                                                                                                                                                                                                                                                                                                                                                                                                                                                                                                                                                                                                                                                                                 |
| EPI_ISL_4190649                                                                                                                                                                                                                                                                                                                                                                                                                                          | Lighthouse Lab in Alderley Park                                                                 | Wellcome Sanger Institute for the COVID-19 Genomics UK (COG-UK) Consortium                      | Cordelia Langford; David K. Jackson; Dominic Kwiatkowski; Ewan Harrison; Ian Johnston; Jacquelyn Wynn; Jeffrey Barrett; John Sillitoe on behalf of the Wellcome Sanger Institute COVID-19 Surveillance Team; Mairead Hyland; Roberto Amato; Sonia Goncalves; The Lighthouse Lab in Alderley Park and Alex Alderton                                                                                                                                                                                                                                                                                                                                                                                                                                                                                                                                                                                                                                                                                                                                               |
| EPI_ISL_4067974                                                                                                                                                                                                                                                                                                                                                                                                                                          | Lighthouse Lab in Glasgow                                                                       | Wellcome Sanger Institute for the COVID-19 Genomics UK (COG-UK) Consortium                      | Anna Dominiczak and Alex Alderton; Carol Clugston; Cordelia Langford; David Gray; David K. Jackson; Dominic Kwiatkowski; Ewan Harrison; Harper VanSteenhouse; Ian Johnston; Jeffrey Barrett; John Sillitoe on behalf of the Wellcome Sanger Institute COVID-19 Surveillance Team; Roberto Amato; Sonia Goncalves; Yumi Kasai                                                                                                                                                                                                                                                                                                                                                                                                                                                                                                                                                                                                                                                                                                                                     |

|                                                                                                                                                                                                                                                                                                                                                                                                                                                                                                                                                                                                                                                                                                                                                                                                                                                                                                                                                                                                                                                                                                                                                                                                    |           |                                                                                                                                 |                                                                                           |                                                                                                                                                                                                                                                                                                                                                                                                                                                                                                                                                                                                            |
|----------------------------------------------------------------------------------------------------------------------------------------------------------------------------------------------------------------------------------------------------------------------------------------------------------------------------------------------------------------------------------------------------------------------------------------------------------------------------------------------------------------------------------------------------------------------------------------------------------------------------------------------------------------------------------------------------------------------------------------------------------------------------------------------------------------------------------------------------------------------------------------------------------------------------------------------------------------------------------------------------------------------------------------------------------------------------------------------------------------------------------------------------------------------------------------------------|-----------|---------------------------------------------------------------------------------------------------------------------------------|-------------------------------------------------------------------------------------------|------------------------------------------------------------------------------------------------------------------------------------------------------------------------------------------------------------------------------------------------------------------------------------------------------------------------------------------------------------------------------------------------------------------------------------------------------------------------------------------------------------------------------------------------------------------------------------------------------------|
| EPI_ISL_4143330, EPI_ISL_4143847, EPI_ISL_4265161, EPI_ISL_4320666, EPI_ISL_4404310, EPI_ISL_4478842, EPI_ISL_4522086                                                                                                                                                                                                                                                                                                                                                                                                                                                                                                                                                                                                                                                                                                                                                                                                                                                                                                                                                                                                                                                                              | see above | Lighthouse Lab in Milton Keynes                                                                                                 | Wellcome Sanger Institute for the COVID-19 Genomics UK (COG-UK) Consortium                | Cordelia Langford; David K. Jackson; Dominic Kwiatkowski; Ewan Harrison; Ian Johnston; Jeffrey Barrett; John Sillitoe on behalf of the Wellcome Sanger Institute COVID-19 Surveillance Team; Roberto Amato; Sonia Goncalves; The Lighthouse Lab in Milton Keynes and Alex Alderton                                                                                                                                                                                                                                                                                                                         |
| EPI_ISL_4622959                                                                                                                                                                                                                                                                                                                                                                                                                                                                                                                                                                                                                                                                                                                                                                                                                                                                                                                                                                                                                                                                                                                                                                                    |           | Limbach - MVZ Labor Dr. Volkmann & Kollegen                                                                                     | Robert Koch Institute                                                                     |                                                                                                                                                                                                                                                                                                                                                                                                                                                                                                                                                                                                            |
| EPI_ISL_4235115                                                                                                                                                                                                                                                                                                                                                                                                                                                                                                                                                                                                                                                                                                                                                                                                                                                                                                                                                                                                                                                                                                                                                                                    |           | MCL Medizinische Laboratorien, Hauptstandort Niederwangen                                                                       | Institute for Infectious Diseases, University of Bern                                     | Alban Ramette; Christian Baumann; Cora Sägesser; Franziska Suter-Riniker; Loïc Borcard; Miguel A Terrazos Miani; Nicole Liechti; Pascal Bittel; Peter Keller; Sonja Gempeler; Stefan Neuwenschwander; Stephen L Leib                                                                                                                                                                                                                                                                                                                                                                                       |
| EPI_ISL_4437698, EPI_ISL_4612161, EPI_ISL_4624864                                                                                                                                                                                                                                                                                                                                                                                                                                                                                                                                                                                                                                                                                                                                                                                                                                                                                                                                                                                                                                                                                                                                                  |           | MDI Limbach Berlin GmbH; MVZ Labor Berlin                                                                                       | Robert Koch Institute                                                                     |                                                                                                                                                                                                                                                                                                                                                                                                                                                                                                                                                                                                            |
| EPI_ISL_4606392, EPI_ISL_4606983                                                                                                                                                                                                                                                                                                                                                                                                                                                                                                                                                                                                                                                                                                                                                                                                                                                                                                                                                                                                                                                                                                                                                                   |           | MIRIALIS CLUSES BECHET                                                                                                          | CNR Virus des Infections Respiratoires - France SUD                                       | Antonin Bal; Bruno Lina; Gregory Destras; Gwendolynne Burfin; Hadrien Regue; Laurence Josset; Martine Valette; Quentin Semanas                                                                                                                                                                                                                                                                                                                                                                                                                                                                             |
| EPI_ISL_4610160, EPI_ISL_4610208                                                                                                                                                                                                                                                                                                                                                                                                                                                                                                                                                                                                                                                                                                                                                                                                                                                                                                                                                                                                                                                                                                                                                                   |           | MVZ Dr. Eberhard & Partner Dortmund                                                                                             | Robert Koch Institute                                                                     |                                                                                                                                                                                                                                                                                                                                                                                                                                                                                                                                                                                                            |
| EPI_ISL_4609748                                                                                                                                                                                                                                                                                                                                                                                                                                                                                                                                                                                                                                                                                                                                                                                                                                                                                                                                                                                                                                                                                                                                                                                    |           | MVZ Labor Dr. Limbach & Kollegen GbR                                                                                            | Robert Koch Institute                                                                     |                                                                                                                                                                                                                                                                                                                                                                                                                                                                                                                                                                                                            |
| EPI_ISL_4616604                                                                                                                                                                                                                                                                                                                                                                                                                                                                                                                                                                                                                                                                                                                                                                                                                                                                                                                                                                                                                                                                                                                                                                                    |           | MVZ Labor Krone GbR                                                                                                             | Robert Koch Institute                                                                     |                                                                                                                                                                                                                                                                                                                                                                                                                                                                                                                                                                                                            |
| EPI_ISL_4258880, EPI_ISL_4258911, EPI_ISL_4258915                                                                                                                                                                                                                                                                                                                                                                                                                                                                                                                                                                                                                                                                                                                                                                                                                                                                                                                                                                                                                                                                                                                                                  |           | Medical Laboratories Duesseldorf                                                                                                | Center of Medical Microbiology, Virology, and Hospital Hygiene, University of Duesseldorf | Alexander Dilthey; Andreas Walker; Angelika Helmer; Christian Lange; Daniel Strelow; Jessica Nicola; Jörg Timm; Klaus Pfeffer; Lisanna Hülse; Malte Kohns Vasconcelos; Maximilian Damagnez; Nadine Lübke; Tobias Wienemann; Torsten Houwaart                                                                                                                                                                                                                                                                                                                                                               |
| EPI_ISL_4225558, EPI_ISL_4225587, EPI_ISL_4439827, EPI_ISL_4439838, EPI_ISL_4439861, EPI_ISL_4609576, EPI_ISL_4609595, EPI_ISL_4609610, EPI_ISL_4612079, EPI_ISL_4612089                                                                                                                                                                                                                                                                                                                                                                                                                                                                                                                                                                                                                                                                                                                                                                                                                                                                                                                                                                                                                           | see above | Medizinische Laboratorien Düsseldorf                                                                                            | Robert Koch Institute                                                                     |                                                                                                                                                                                                                                                                                                                                                                                                                                                                                                                                                                                                            |
| EPI_ISL_4080639, EPI_ISL_4279179, EPI_ISL_4279181                                                                                                                                                                                                                                                                                                                                                                                                                                                                                                                                                                                                                                                                                                                                                                                                                                                                                                                                                                                                                                                                                                                                                  |           | Microbiology Department - University Hospital Brussel                                                                           | Microbiology Department - University Hospital Brussel                                     | Florence Crombé; Oriane Soetens; Thomas Demuyser                                                                                                                                                                                                                                                                                                                                                                                                                                                                                                                                                           |
| EPI_ISL_4172014, EPI_ISL_4172034, EPI_ISL_4172083, EPI_ISL_4303778, EPI_ISL_4303846, EPI_ISL_4359775, EPI_ISL_4359924, EPI_ISL_4359926, EPI_ISL_4359929, EPI_ISL_4359985, EPI_ISL_4533573, EPI_ISL_4533581, EPI_ISL_4533590, EPI_ISL_4533597, EPI_ISL_4533610, EPI_ISL_4533783, EPI_ISL_4533784, EPI_ISL_4533861                                                                                                                                                                                                                                                                                                                                                                                                                                                                                                                                                                                                                                                                                                                                                                                                                                                                                   | see above | Microbiology Department, Laboratori Clinic Metropolitana Nord, Hospital Universitari Germans Trias i Pujol                      | Can Ruti SARS-CoV-2 Sequencing Hub (HUGTIP/IRSI/CAIXA/GTTP)                               | Alexia Paris; Anna Not; Antoni E Bordoy; Bonaventura Clotet; Cristina Casafí; David Panisello; Francesc Catala-Moll; Gemma Clara; Ignacio Blanco; Laia Soler; Lauro Sumoy; Marc Noguera-Julian; Maria Casadellà; Mariona Parera; Mercedes Guerrero; Montserrat Giménez; Pere-Joan Cardona; Pilar Armengol; Roger Paredes; Verónica Saludes; and Elisa Martró on behalf of the Can Ruti SARS-CoV-2 Sequencing Hub                                                                                                                                                                                           |
| EPI_ISL_4416774                                                                                                                                                                                                                                                                                                                                                                                                                                                                                                                                                                                                                                                                                                                                                                                                                                                                                                                                                                                                                                                                                                                                                                                    |           | Microvida                                                                                                                       | Microvida                                                                                 | Jaco Verweij; Joep Stohr; Suzan D. Pas                                                                                                                                                                                                                                                                                                                                                                                                                                                                                                                                                                     |
| EPI_ISL_4429345                                                                                                                                                                                                                                                                                                                                                                                                                                                                                                                                                                                                                                                                                                                                                                                                                                                                                                                                                                                                                                                                                                                                                                                    |           | Ministry of Health Turkey                                                                                                       | Ministry of Health Turkey                                                                 | Fatma Bayraktar; Gülay Korukluoğlu; Süleyman Yalcin; Yasemin Coşgun                                                                                                                                                                                                                                                                                                                                                                                                                                                                                                                                        |
| EPI_ISL_4199096                                                                                                                                                                                                                                                                                                                                                                                                                                                                                                                                                                                                                                                                                                                                                                                                                                                                                                                                                                                                                                                                                                                                                                                    |           | NYU Langone Health                                                                                                              | Departments of Pathology and Medicine, New York University School of Medicine             | Adriana Hequy; Christian Marier; Dacia Dimartino; Emily Guzman; Gael Westby; Guiqing Wang; Paolo Cotzia; Paul Zappile; Peter Meyn; Sitharam Ramaswami; Yutong Zhang                                                                                                                                                                                                                                                                                                                                                                                                                                        |
| EPI_ISL_4195076, EPI_ISL_4195098, EPI_ISL_4195102, EPI_ISL_4195109, EPI_ISL_4195111, EPI_ISL_4195113, EPI_ISL_4195115, EPI_ISL_4515925, EPI_ISL_4515950, EPI_ISL_4516317                                                                                                                                                                                                                                                                                                                                                                                                                                                                                                                                                                                                                                                                                                                                                                                                                                                                                                                                                                                                                           | see above | National Platform bis UMONS/Joimont                                                                                             | National Platform bis UMONS/Joimont                                                       | Eric Tarantino; Florian Juszczak; Gautier Detry; Guillaume Bayon-Vicente; Laetitia Gheysen; Ruddy Wattiez                                                                                                                                                                                                                                                                                                                                                                                                                                                                                                  |
| EPI_ISL_4604584                                                                                                                                                                                                                                                                                                                                                                                                                                                                                                                                                                                                                                                                                                                                                                                                                                                                                                                                                                                                                                                                                                                                                                                    |           | ORIAPOLE                                                                                                                        | CNR Virus des Infections Respiratoires - France SUD                                       | Antonin Bal; Bruno Lina; Gregory Destras; Gwendolynne Burfin; Hadrien Regue; Laurence Josset; Martine Valette; Quentin Semanas                                                                                                                                                                                                                                                                                                                                                                                                                                                                             |
| EPI_ISL_4315062                                                                                                                                                                                                                                                                                                                                                                                                                                                                                                                                                                                                                                                                                                                                                                                                                                                                                                                                                                                                                                                                                                                                                                                    |           | Originating lab: Wales Specialist Virology Centre Sequencing lab: Pathogen Genomics Unit                                        | Public Health Wales Microbiology Cardiff Wales Specialist Virology Centre                 | Alec Birchley; Alexander Adams; Amy Gaskin; Angela Marchbank; Bree Gatica-Wilcox; Catherine Moore; Jason Coombes; Joanne Watkins; Joel Southgate; Johnathan Evans; Laura Gifford; Lauren Gilbert; Lee Graham; Malorie Perry; Matthew Bull; Nicole Pacchiarni; Sally Corden; Sara Kumziene-Summerhayes; Sara Rey; Sarah Taylor; Simon Cottrell; Sophie Jones; Tom Connor                                                                                                                                                                                                                                    |
| EPI_ISL_4416995                                                                                                                                                                                                                                                                                                                                                                                                                                                                                                                                                                                                                                                                                                                                                                                                                                                                                                                                                                                                                                                                                                                                                                                    |           | Osp. S.Pertini                                                                                                                  | INMI Lazzaro Spallanzani IRCCS                                                            | A Di Caro; B Bartolini; CEM Gruber; E Giombini; F Messina; F Santini; G Bonfiglio; M Rueca; MR Capobianchi; O Butera                                                                                                                                                                                                                                                                                                                                                                                                                                                                                       |
| EPI_ISL_4492287                                                                                                                                                                                                                                                                                                                                                                                                                                                                                                                                                                                                                                                                                                                                                                                                                                                                                                                                                                                                                                                                                                                                                                                    |           | PAMM                                                                                                                            | Laboratory of Medical Microbiology and Pathology, PAMM                                    | Christel van Herk; Inge Briels; Jeroen van de Bovenkamp; Maaik Broeders; Pleunie van Alphen                                                                                                                                                                                                                                                                                                                                                                                                                                                                                                                |
| EPI_ISL_4546886                                                                                                                                                                                                                                                                                                                                                                                                                                                                                                                                                                                                                                                                                                                                                                                                                                                                                                                                                                                                                                                                                                                                                                                    |           | Pandemic Response Lab - NYC                                                                                                     | Pandemic Response Lab, R&D                                                                | Alex Carpio; Cybill del Castillo; Dylan Law; Haiping Hao; Henry Lee; Isabel Fernandez Escapa; Jon Laurent; Melissa Hopkins; Michael Hammerling; Pradeep Bugga; Shinyoung Clair Kang; Sol Rey; William Ward                                                                                                                                                                                                                                                                                                                                                                                                 |
| EPI_ISL_4050677, EPI_ISL_4050685, EPI_ISL_4050691, EPI_ISL_4071905, EPI_ISL_4071909, EPI_ISL_4186337, EPI_ISL_4186480, EPI_ISL_4219262, EPI_ISL_4261670, EPI_ISL_4261688, EPI_ISL_4261689, EPI_ISL_4263086, EPI_ISL_4419282, EPI_ISL_4419283, EPI_ISL_4633216, EPI_ISL_4633218, EPI_ISL_4633222                                                                                                                                                                                                                                                                                                                                                                                                                                                                                                                                                                                                                                                                                                                                                                                                                                                                                                    | see above | Plateforme de testing Namuroise                                                                                                 | Plateforme de testing Namuroise                                                           | Degosserie Jonathan; Demars Aurore; Denis Olivier; Gilliard Nicolas; Lesly Nyinkeu Kemamen; Maschietto Céline; Muller François; Nicolas Gilliard; Nobis Chloé; Nyinkeu Kemamen Lesly; Otto Gaetan                                                                                                                                                                                                                                                                                                                                                                                                          |
| EPI_ISL_4059368, EPI_ISL_4059376, EPI_ISL_4059389, EPI_ISL_4211035, EPI_ISL_4211050, EPI_ISL_4211069, EPI_ISL_4211125, EPI_ISL_4211127, EPI_ISL_4212606, EPI_ISL_4212613, EPI_ISL_4212618, EPI_ISL_4275299, EPI_ISL_4275346, EPI_ISL_4392335, EPI_ISL_4392346, EPI_ISL_4392376, EPI_ISL_4392384, EPI_ISL_4392385, EPI_ISL_4392392, EPI_ISL_4505549, EPI_ISL_4505634                                                                                                                                                                                                                                                                                                                                                                                                                                                                                                                                                                                                                                                                                                                                                                                                                                | see above | Platform BIS UZA/UAntwerpen                                                                                                     | Labo Klinische Biologie, UZA                                                              | Basil Britto Xavier; Christine Lammens; Herman Goossens; Ines Verbesselt; Jasmine Coppens; Kathleen Holemans; Marie Le Mercier; Veerle Matheussen                                                                                                                                                                                                                                                                                                                                                                                                                                                          |
| EPI_ISL_4106050, EPI_ISL_4413089                                                                                                                                                                                                                                                                                                                                                                                                                                                                                                                                                                                                                                                                                                                                                                                                                                                                                                                                                                                                                                                                                                                                                                   |           | Polyanalytic SA                                                                                                                 | Genesupport                                                                               | Geraldine Jost; Katia Jaton; Nadia Liassine; Tanguy ARAUD                                                                                                                                                                                                                                                                                                                                                                                                                                                                                                                                                  |
| EPI_ISL_4548550                                                                                                                                                                                                                                                                                                                                                                                                                                                                                                                                                                                                                                                                                                                                                                                                                                                                                                                                                                                                                                                                                                                                                                                    |           | Pracownia Diagnostyki Molekularnej COVID-19 Wojewódzkiego Szpitala Specjalistycznego we Wrocławiu, Ośrodka Badawczo-Rozwojowego | Wojewódzka Stacja Sanitarno-Epidemiologiczna w Gorzowie Wielkopolskim                     | Elżbieta Justyńska; Klaudia Kobendza-Wodarczak; Patrycja Faberska and Marek Magol; Renata Siegel                                                                                                                                                                                                                                                                                                                                                                                                                                                                                                           |
| EPI_ISL_4307554, EPI_ISL_4307796, EPI_ISL_4307797, EPI_ISL_4307854                                                                                                                                                                                                                                                                                                                                                                                                                                                                                                                                                                                                                                                                                                                                                                                                                                                                                                                                                                                                                                                                                                                                 |           | Quadram Institute Bioscience                                                                                                    | COVID-19 Genomics UK (COG-UK) Consortium                                                  | Alexander J Trotter; Alison E. Mather; Alp Aydin; Ana P. Tedim; Anastasia Kolyva; Andrew Bell; Andrew J. Page; Christopher Jeanes; Claire Stuart; Dave J. Baker; Ebenezer Foster-Nyarko; Gemma L. Kay; John Wain; Justin O'Grady; Leonardo de Oliveira Martins; Lewis G. Spurgin; Lindsay Coupland; Lizzie Meadows; Luke Bedford; Maria Diaz; Mark Webber; Martin Lott; Muhammed Yasir; Nabil-Fareed Ali Khan; Ngozi Elumogo; Nicholas M. Thomson; Rachael Stanley; Rachel Gilroy; Reenesh Prakash; Rose K Davidson; Samir Dervisevic; Samuel Bloomfield; Sophie J. Prosolek; Steven Rudder; Thanh Le-Viet |
| EPI_ISL_4606800, EPI_ISL_4606827, EPI_ISL_4606926                                                                                                                                                                                                                                                                                                                                                                                                                                                                                                                                                                                                                                                                                                                                                                                                                                                                                                                                                                                                                                                                                                                                                  |           | REUNILAB                                                                                                                        | CNR Virus des Infections Respiratoires - France SUD                                       | Antonin Bal; Bruno Lina; Gregory Destras; Gwendolynne Burfin; Hadrien Regue; Laurence Josset; Martine Valette; Quentin Semanas                                                                                                                                                                                                                                                                                                                                                                                                                                                                             |
| EPI_ISL_4117688, EPI_ISL_4117752, EPI_ISL_4117782, EPI_ISL_4117796, EPI_ISL_4117835, EPI_ISL_4118705, EPI_ISL_4118738, EPI_ISL_4118766, EPI_ISL_4118776, EPI_ISL_4118784, EPI_ISL_4118784, EPI_ISL_4118794, EPI_ISL_4121346, EPI_ISL_4121407, EPI_ISL_4121526, EPI_ISL_4121702, EPI_ISL_4122029, EPI_ISL_4122339, EPI_ISL_4122786, EPI_ISL_4122794, EPI_ISL_4123735, EPI_ISL_4308371, EPI_ISL_4308419, EPI_ISL_4308549, EPI_ISL_4308600, EPI_ISL_4309091, EPI_ISL_4309027, EPI_ISL_4309050, EPI_ISL_4309239, EPI_ISL_4311857, EPI_ISL_4311965, EPI_ISL_4529926, EPI_ISL_4530106, EPI_ISL_4530312, EPI_ISL_4530472, EPI_ISL_4530672, EPI_ISL_4530871, EPI_ISL_4531384, EPI_ISL_4531634, EPI_ISL_4531847, EPI_ISL_4531848                                                                                                                                                                                                                                                                                                                                                                                                                                                                            | see above | Respiratory Virus Unit, Microbiology Services Colindale, Public Health England                                                  | COVID-19 Genomics UK (COG-UK) Consortium                                                  | PHÉ Covid Sequencing Team                                                                                                                                                                                                                                                                                                                                                                                                                                                                                                                                                                                  |
| EPI_ISL_4506526                                                                                                                                                                                                                                                                                                                                                                                                                                                                                                                                                                                                                                                                                                                                                                                                                                                                                                                                                                                                                                                                                                                                                                                    |           | SARS-CoV-2 Sequencing Castilla y Leon-Spain Consortium                                                                          | SARS-CoV-2 Sequencing Castilla y Leon-Spain Consortium                                    | Antonio Orduña-Domingo; Carlos Fuster Foz; Carmen Aldea-Mansilla; Carmen Gimeno Crespo; David Abad; Gabriel March Rosello; Gregoria Megías Lobón; Jose Maria Eiros Bouza; M. Isabel Fernandez-Natal; Marta Dominguez-Gil; Marta Hernandez; María Antonia García Castro; Mª F Brezmes-Valdivieso; Noelia Arenal Andrés; Silvia Rojo; Sonsoles Garcinuño Pérez                                                                                                                                                                                                                                               |
| EPI_ISL_4489273, EPI_ISL_4489286, EPI_ISL_4489314, EPI_ISL_4489342, EPI_ISL_4489447, EPI_ISL_4489633, EPI_ISL_4489643, EPI_ISL_4489700, EPI_ISL_4489715, EPI_ISL_4489749, EPI_ISL_4492577, EPI_ISL_4492629, EPI_ISL_4492656, EPI_ISL_4600156, EPI_ISL_4600175                                                                                                                                                                                                                                                                                                                                                                                                                                                                                                                                                                                                                                                                                                                                                                                                                                                                                                                                      | see above | SYNLAB                                                                                                                          | GIGA Medical Genomics                                                                     | Bouchra Boujemla; Claire Gourzouès; Cécile Meex; Keith Durkin; Laurent Gillet; Maria Artesi; Marie-Pierre Hayette; Nadine Cambisano; Nathalie Renotte; Olivier Ek; Sébastien Bontems; Vincent Bours                                                                                                                                                                                                                                                                                                                                                                                                        |
| EPI_ISL_4438679, EPI_ISL_4613250, EPI_ISL_4613319, EPI_ISL_4613447, EPI_ISL_4613740, EPI_ISL_4613878                                                                                                                                                                                                                                                                                                                                                                                                                                                                                                                                                                                                                                                                                                                                                                                                                                                                                                                                                                                                                                                                                               |           | SYNLAB MVZ Leinfelden-Echterdingen                                                                                              | Robert Koch Institute                                                                     |                                                                                                                                                                                                                                                                                                                                                                                                                                                                                                                                                                                                            |
| EPI_ISL_4045353, EPI_ISL_4222245, EPI_ISL_4222274, EPI_ISL_4222979, EPI_ISL_4222989, EPI_ISL_4223602, EPI_ISL_4223696, EPI_ISL_4223717, EPI_ISL_4223982, EPI_ISL_4224007, EPI_ISL_4224179, EPI_ISL_4228831, EPI_ISL_4228880, EPI_ISL_4229153, EPI_ISL_4229239, EPI_ISL_4229294, EPI_ISL_4229320, EPI_ISL_4229322, EPI_ISL_4229584, EPI_ISL_4230184, EPI_ISL_4230357, EPI_ISL_4230754, EPI_ISL_4436802, EPI_ISL_4436836, EPI_ISL_4436854, EPI_ISL_4437147, EPI_ISL_4438664, EPI_ISL_4442646, EPI_ISL_4442730, EPI_ISL_4442876, EPI_ISL_4443215, EPI_ISL_4443327, EPI_ISL_4443335, EPI_ISL_4443369, EPI_ISL_4443719, EPI_ISL_4443757, EPI_ISL_4444007, EPI_ISL_4444011, EPI_ISL_4446099, EPI_ISL_4446102, EPI_ISL_4446158, EPI_ISL_4446201, EPI_ISL_4446202, EPI_ISL_4446251, EPI_ISL_4446375, EPI_ISL_4446387, EPI_ISL_4610223, EPI_ISL_4610276, EPI_ISL_4610361, EPI_ISL_4610607, EPI_ISL_4610749, EPI_ISL_4613019, EPI_ISL_4613046, EPI_ISL_4613106, EPI_ISL_4613476, EPI_ISL_4613589, EPI_ISL_4613609, EPI_ISL_4615551, EPI_ISL_4615632, EPI_ISL_4615719, EPI_ISL_4615887, EPI_ISL_4615895, EPI_ISL_4615912, EPI_ISL_4617676, EPI_ISL_4617936, EPI_ISL_4617945, EPI_ISL_4617973, EPI_ISL_4617999 | see above | SYNLAB MVZ Leverkusen                                                                                                           | Robert Koch Institute                                                                     |                                                                                                                                                                                                                                                                                                                                                                                                                                                                                                                                                                                                            |
| EPI_ISL_4043757, EPI_ISL_4044227, EPI_ISL_4044751, EPI_ISL_4044832, EPI_ISL_4045014, EPI_ISL_4045042, EPI_ISL_4222291, EPI_ISL_4224095, EPI_ISL_4226258, EPI_ISL_4226262, EPI_ISL_4226424, EPI_ISL_4230010, EPI_ISL_4230013, EPI_ISL_4230174, EPI_ISL_4230463, EPI_ISL_4443036, EPI_ISL_4443258, EPI_ISL_4610401                                                                                                                                                                                                                                                                                                                                                                                                                                                                                                                                                                                                                                                                                                                                                                                                                                                                                   | see above | SYNLAB MVZ Trier                                                                                                                | Robert Koch Institute                                                                     |                                                                                                                                                                                                                                                                                                                                                                                                                                                                                                                                                                                                            |
| EPI_ISL_4438496, EPI_ISL_4613687, EPI_ISL_4616062, EPI_ISL_4616067                                                                                                                                                                                                                                                                                                                                                                                                                                                                                                                                                                                                                                                                                                                                                                                                                                                                                                                                                                                                                                                                                                                                 |           | SYNLAB MVZ Weiden                                                                                                               | Robert Koch Institute                                                                     |                                                                                                                                                                                                                                                                                                                                                                                                                                                                                                                                                                                                            |
| EPI_ISL_4441476,                                                                                                                                                                                                                                                                                                                                                                                                                                                                                                                                                                                                                                                                                                                                                                                                                                                                                                                                                                                                                                                                                                                                                                                   |           | Sonic - Bioscientia - MVZ Labor Saar                                                                                            | Robert Koch Institute                                                                     |                                                                                                                                                                                                                                                                                                                                                                                                                                                                                                                                                                                                            |

|                                                                                                                                                                                                                                                                                                                                                                                                                                                                                                                                                                                                                                                                                                                                                           |                                                                                                                                  |                                                                                               |                                                                                                                                                                                                                                                                                                                                                                                                                                                                                                                                                       |                                                                                                                                                                                                                                                           |
|-----------------------------------------------------------------------------------------------------------------------------------------------------------------------------------------------------------------------------------------------------------------------------------------------------------------------------------------------------------------------------------------------------------------------------------------------------------------------------------------------------------------------------------------------------------------------------------------------------------------------------------------------------------------------------------------------------------------------------------------------------------|----------------------------------------------------------------------------------------------------------------------------------|-----------------------------------------------------------------------------------------------|-------------------------------------------------------------------------------------------------------------------------------------------------------------------------------------------------------------------------------------------------------------------------------------------------------------------------------------------------------------------------------------------------------------------------------------------------------------------------------------------------------------------------------------------------------|-----------------------------------------------------------------------------------------------------------------------------------------------------------------------------------------------------------------------------------------------------------|
| EPI_ISL_4441501,<br>EPI_ISL_4611382,<br>EPI_ISL_4614431,<br>EPI_ISL_4614863                                                                                                                                                                                                                                                                                                                                                                                                                                                                                                                                                                                                                                                                               | GmbH                                                                                                                             |                                                                                               |                                                                                                                                                                                                                                                                                                                                                                                                                                                                                                                                                       |                                                                                                                                                                                                                                                           |
| EPI_ISL_4108518, EPI_ISL_4108522, EPI_ISL_4108542, EPI_ISL_4108563, EPI_ISL_4108567, EPI_ISL_4108572, EPI_ISL_4108584, EPI_ISL_4108613, EPI_ISL_4108622, EPI_ISL_4335864, EPI_ISL_4335899, EPI_ISL_4335914, EPI_ISL_4335922, EPI_ISL_4335956, EPI_ISL_4335992, EPI_ISL_4336024, EPI_ISL_4336032, EPI_ISL_4336056, EPI_ISL_4336099, EPI_ISL_4336110, EPI_ISL_4336112, EPI_ISL_4336120, EPI_ISL_4336166, EPI_ISL_4336179, EPI_ISL_4336207, EPI_ISL_4336216, EPI_ISL_4336220, EPI_ISL_4336225, EPI_ISL_4336236, EPI_ISL_4336248, EPI_ISL_4336255, EPI_ISL_4336266, EPI_ISL_4336298, EPI_ISL_4336309, EPI_ISL_4336326, EPI_ISL_4336371, EPI_ISL_4336386, EPI_ISL_4336406, EPI_ISL_4336442, EPI_ISL_4336448, EPI_ISL_4336520, EPI_ISL_4336522, EPI_ISL_4336527 | see above                                                                                                                        | Swedish national genomic surveillance program of SARS-CoV-2                                   | The Public Health Agency of Sweden                                                                                                                                                                                                                                                                                                                                                                                                                                                                                                                    | Alma Brolund; Maria Lind Karlberg; Maximilian Riess; Swedish national genomic surveillance program of SARS-CoV-2                                                                                                                                          |
| EPI_ISL_4229820,<br>EPI_ISL_4230835,<br>EPI_ISL_4230837,<br>EPI_ISL_4230838,<br>EPI_ISL_4444068,<br>EPI_ISL_4608795                                                                                                                                                                                                                                                                                                                                                                                                                                                                                                                                                                                                                                       | Synlab MVZ Augsburg                                                                                                              | Robert Koch Institute                                                                         |                                                                                                                                                                                                                                                                                                                                                                                                                                                                                                                                                       |                                                                                                                                                                                                                                                           |
| EPI_ISL_3876210,<br>EPI_ISL_3997151,<br>EPI_ISL_4170837,<br>EPI_ISL_4357232                                                                                                                                                                                                                                                                                                                                                                                                                                                                                                                                                                                                                                                                               | U.O. Microbiologia Laboratorio Unico Centro Servizi - AUSL della Romagna                                                         | U.O. Microbiologia, Laboratorio Unico Centro Servizi - AUSL della Romagna                     |                                                                                                                                                                                                                                                                                                                                                                                                                                                                                                                                                       | Giorgio Dirani                                                                                                                                                                                                                                            |
| EPI_ISL_4477279                                                                                                                                                                                                                                                                                                                                                                                                                                                                                                                                                                                                                                                                                                                                           | UAB Diagnostikos laboratorija                                                                                                    | National Public Health Surveillance Laboratory                                                |                                                                                                                                                                                                                                                                                                                                                                                                                                                                                                                                                       | Ana Steponkiene; Danas Baksa; Jelena Razmuk; Lukas Vasionis; Lukas Zemaitis; Migle Gabrielaite; Svajune Muralyte                                                                                                                                          |
| EPI_ISL_4345204                                                                                                                                                                                                                                                                                                                                                                                                                                                                                                                                                                                                                                                                                                                                           | UMC Groningen, Clinical Virology, Department of Medical Microbiology and Infection Prevention                                    | UMC Groningen, Clinical Virology, Department of Medical Microbiology and Infection Prevention |                                                                                                                                                                                                                                                                                                                                                                                                                                                                                                                                                       | Alexander Friedrich; Coretta Van Leer-Buter; Erley Lizarazo-Forero; Hubert Niesters; Lilli Gard; Marjolein Knoester; Monika Fliss; Sigrid Rosema; Xuewei Zhou                                                                                             |
| EPI_ISL_4396619                                                                                                                                                                                                                                                                                                                                                                                                                                                                                                                                                                                                                                                                                                                                           | UNILABS                                                                                                                          | Instituto Nacional de Saude (INSA)                                                            |                                                                                                                                                                                                                                                                                                                                                                                                                                                                                                                                                       | Borges et al                                                                                                                                                                                                                                              |
| EPI_ISL_4528342                                                                                                                                                                                                                                                                                                                                                                                                                                                                                                                                                                                                                                                                                                                                           | University College London, Great Ormond Street Hospital for Children NHS Foundation Trust, Imperial College Healthcare NHS Trust | COVID-19 Genomics UK (COG-UK) Consortium                                                      |                                                                                                                                                                                                                                                                                                                                                                                                                                                                                                                                                       | Charlotte Williams; Helena Tutill; Judith Breuer; Marius Cotic; Mark Kristiansen; Nadua Bayzid; Patricia Dyal; Rachel Williams; Sergi Castellano; Sunando Roy                                                                                             |
| EPI_ISL_4274240, EPI_ISL_4274287, EPI_ISL_4274417, EPI_ISL_4508046, EPI_ISL_4508149, EPI_ISL_4634030, EPI_ISL_4634120                                                                                                                                                                                                                                                                                                                                                                                                                                                                                                                                                                                                                                     | see above                                                                                                                        | University Hospitals of Geneva, Laboratory of Virology                                        | HUG, Laboratory of Virology and the Health2030 Genome Center                                                                                                                                                                                                                                                                                                                                                                                                                                                                                          | Aline Mamin; Ana Rita Gonçalves; Cedric Howald; Deborah Penet; Francisco Perez; Henri Pegeot; Ioannis Xenarios; Keith Harshman; Laurent Kaiser; Lorenzo Cerutti; Melyssa Elies; Samuel Cordey                                                             |
| EPI_ISL_4489244, EPI_ISL_4492758, EPI_ISL_4492784, EPI_ISL_4492792, EPI_ISL_4548683, EPI_ISL_4548692, EPI_ISL_4548703, EPI_ISL_4548705, EPI_ISL_4548719, EPI_ISL_4548723, EPI_ISL_4548726, EPI_ISL_4548728, EPI_ISL_4548756, EPI_ISL_4548764                                                                                                                                                                                                                                                                                                                                                                                                                                                                                                              | see above                                                                                                                        | University of Liège COVID-19 testing center                                                   | GIGA Medical Genomics                                                                                                                                                                                                                                                                                                                                                                                                                                                                                                                                 | Bouchra Boujemla; Claire Gourzonès; Cécile Meex; Keith Durkin; Laurent Gillet; Maria Artesi; Marie-Pierre Hayette; Nadine Cambisano; Nathalie Renotte; Olivier Ek; Sébastien Bontems; Vincent Bours                                                       |
| EPI_ISL_4227593,<br>EPI_ISL_4441301                                                                                                                                                                                                                                                                                                                                                                                                                                                                                                                                                                                                                                                                                                                       | Universitätsklinikum Frankfurt - Institut für Medizinische Virologie                                                             | Robert Koch Institute                                                                         |                                                                                                                                                                                                                                                                                                                                                                                                                                                                                                                                                       |                                                                                                                                                                                                                                                           |
| EPI_ISL_4575737,<br>EPI_ISL_4603447                                                                                                                                                                                                                                                                                                                                                                                                                                                                                                                                                                                                                                                                                                                       | Utah Public Health Laboratory                                                                                                    | Utah Public Health Laboratory                                                                 |                                                                                                                                                                                                                                                                                                                                                                                                                                                                                                                                                       | Erin L. Young; John Arn; Kelly F. Oakeson; Olinto Linares-Perdomo; Pooja Gupta                                                                                                                                                                            |
| EPI_ISL_4580731,<br>EPI_ISL_4580785,<br>EPI_ISL_4631594                                                                                                                                                                                                                                                                                                                                                                                                                                                                                                                                                                                                                                                                                                   | Viollier AG                                                                                                                      | Department of Biosystems Science and Engineering, ETH Zürich                                  | Andrea Patrignani; Andrea Cabral de Gouvea; Catharine Aquino; Chaoran Chen; Christian Beisel; Christiane Beckmann; Christoph Noppen; Daniel Ehrsam; Doris Popovic; Elodie Burcklen; Griffin White; Ina Nissen; Isabel Stürmer; Ivan Topolsky; Jay Tracy; Kim Philipp Jablonski; Lara Fuhrmann; Laura Neff; Lennart Opitz; Louis du Plessis; Maria Domenica Moccia; Maurice Redondo; Mirjam Feldkamp; Natascha Santacroce; Niko Beerenwinkel; Olivier Kobel; Ralph Schlapbach; Rebecca Denes; Sarah Nadeau; Simon Grüter; Tanja Stadler; Timothy Sykes |                                                                                                                                                                                                                                                           |
| EPI_ISL_4576919                                                                                                                                                                                                                                                                                                                                                                                                                                                                                                                                                                                                                                                                                                                                           | Yale Clinical Virology Lab                                                                                                       | Grubbaugh Lab - Yale School of Public Health                                                  |                                                                                                                                                                                                                                                                                                                                                                                                                                                                                                                                                       | Anderson Brito; Annie Watkins; Chaney Kalinich; Chantal Vogels; Isabel Ott; Jessica Rothman; Joseph Fauver; Kendall Billig; Mallory Brehan; Marie L. Landry; Mary Petrone; Nathan Grubbaugh; Tara Alpert; Tobias Koch                                     |
| EPI_ISL_4031083, EPI_ISL_4031087, EPI_ISL_4053013, EPI_ISL_4053016, EPI_ISL_4053018, EPI_ISL_4053026, EPI_ISL_4053030, EPI_ISL_4185858, EPI_ISL_4185871, EPI_ISL_4511716, EPI_ISL_4560589                                                                                                                                                                                                                                                                                                                                                                                                                                                                                                                                                                 | see above                                                                                                                        | ZOL                                                                                           | Jessa                                                                                                                                                                                                                                                                                                                                                                                                                                                                                                                                                 | Marijke Raymaekers et al. on behalf of the Jessa_cmdLab; Severine Berden et al. on behalf of the Jessa_cmdLab                                                                                                                                             |
| EPI_ISL_4224981, EPI_ISL_4224984, EPI_ISL_4224993, EPI_ISL_4447467, EPI_ISL_4447505, EPI_ISL_4447519, EPI_ISL_4456016, EPI_ISL_4456024, EPI_ISL_4456031, EPI_ISL_4458217, EPI_ISL_4458241, EPI_ISL_4458248, EPI_ISL_4458257, EPI_ISL_4458262, EPI_ISL_4458264, EPI_ISL_4458265, EPI_ISL_4458266, EPI_ISL_4458269, EPI_ISL_4458282, EPI_ISL_4458321, EPI_ISL_4458367, EPI_ISL_4458372, EPI_ISL_4551718                                                                                                                                                                                                                                                                                                                                                     | see above                                                                                                                        | ZOTZ KLIMAS MVZ Düsseldorf-Centrum GbR ÜBAG für Labormedizin, Genetik, Zytologie, Pathologie  | Center of Medical Microbiology, Virology, and Hospital Hygiene, University of Duesseldorf                                                                                                                                                                                                                                                                                                                                                                                                                                                             | Alexander Dilthey; Andreas Walker; Daniel Strelow; Jessica Nicolai; Jörg Timm; Katrin Hoffmann; Klaus Pfeffer; Lisanna Hülse; Malte Kohns Vasconcelos; Maximilian Damagnez; Nadine Lübke; Patrick Finzer; Rainer Zotz; Tobias Wienemann; Torsten Houwaart |
| EPI_ISL_4440074,<br>EPI_ISL_4611844                                                                                                                                                                                                                                                                                                                                                                                                                                                                                                                                                                                                                                                                                                                       | amedes MVZ Hannover                                                                                                              | Robert Koch Institute                                                                         |                                                                                                                                                                                                                                                                                                                                                                                                                                                                                                                                                       |                                                                                                                                                                                                                                                           |
| EPI_ISL_4630672                                                                                                                                                                                                                                                                                                                                                                                                                                                                                                                                                                                                                                                                                                                                           | labor team w AG                                                                                                                  | Department of Biosystems Science and Engineering, ETH Zürich                                  | Andrea Patrignani; Andreas Lindauer; Andrea Cabral de Gouvea; Catharine Aquino; Chaoran Chen; Daniel Ehrsam; Doris Popovic; Griffin White; Isabel Stürmer; Ivan Topolsky; Jay Tracy; Kim Philipp Jablonski; Lara Fuhrmann; Laura Neff; Lennart Opitz; Louis du Plessis; Maria Domenica Moccia; Monika Bucher; Niko Beerenwinkel; Ralph Schlapbach; Rebekka Pohl; Sarah Nadeau; Simon Grüter; Tanja Stadler; Timothy Sykes                                                                                                                             |                                                                                                                                                                                                                                                           |
