# Supplementary material for: SARS-COV-2 δ variant drives the pandemic in India and Europe via two subvariants
Source: bioRxiv or medRxiv preprint supplement (doi:10.1101/2021.10.16.21265096), 2021-10-20
Supplement: Supplementary file [file media-11.pdf]

We gratefully acknowledge the following Authors from the Originating laboratories responsible for obtaining the specimens, as well as the Submitting laboratories where the genome data were generated and shared via GISAID, on which this research is based.

All Submitters of data may be contacted directly via [www.gisaid.org](http://www.gisaid.org)

Authors are sorted alphabetically.

| Accession ID                                                                                                                                                                                                                                                                                                                                                                                                                                                                                                                                                                                                                                                                                                                                                                                                                                                                                                                                                                                                                                                                                                                                                                                                                                                                                                                                                                                                                                                                                                                                                                                                                                                                                                                                                                                                                                                                                                                                                                                                                                                                                                                                                                                                                                                                                                                                                                                                                                                                                                                                                                                                                                                                                                                                                                                                                                                                                                                                                                                                                               | Originating Laboratory                                                                    | Submitting Laboratory                                    | Authors                                                                                                                                                                                                                                                                                                                                                               |
|--------------------------------------------------------------------------------------------------------------------------------------------------------------------------------------------------------------------------------------------------------------------------------------------------------------------------------------------------------------------------------------------------------------------------------------------------------------------------------------------------------------------------------------------------------------------------------------------------------------------------------------------------------------------------------------------------------------------------------------------------------------------------------------------------------------------------------------------------------------------------------------------------------------------------------------------------------------------------------------------------------------------------------------------------------------------------------------------------------------------------------------------------------------------------------------------------------------------------------------------------------------------------------------------------------------------------------------------------------------------------------------------------------------------------------------------------------------------------------------------------------------------------------------------------------------------------------------------------------------------------------------------------------------------------------------------------------------------------------------------------------------------------------------------------------------------------------------------------------------------------------------------------------------------------------------------------------------------------------------------------------------------------------------------------------------------------------------------------------------------------------------------------------------------------------------------------------------------------------------------------------------------------------------------------------------------------------------------------------------------------------------------------------------------------------------------------------------------------------------------------------------------------------------------------------------------------------------------------------------------------------------------------------------------------------------------------------------------------------------------------------------------------------------------------------------------------------------------------------------------------------------------------------------------------------------------------------------------------------------------------------------------------------------------|-------------------------------------------------------------------------------------------|----------------------------------------------------------|-----------------------------------------------------------------------------------------------------------------------------------------------------------------------------------------------------------------------------------------------------------------------------------------------------------------------------------------------------------------------|
| EPI_ISL_3935142, EPI_ISL_3935165, EPI_ISL_3935178, EPI_ISL_3935212, EPI_ISL_3935213, EPI_ISL_3935224, EPI_ISL_3935227, EPI_ISL_3935228, EPI_ISL_3935230, EPI_ISL_3935239, EPI_ISL_3935241, EPI_ISL_3935242, EPI_ISL_3935249, EPI_ISL_3935250, EPI_ISL_3935260, EPI_ISL_3935262, EPI_ISL_3935271, EPI_ISL_3935273, EPI_ISL_3935274, EPI_ISL_3935277, EPI_ISL_3935281, EPI_ISL_3935283, EPI_ISL_3935285, EPI_ISL_3935286, EPI_ISL_3935293, EPI_ISL_3935294, EPI_ISL_3935295, EPI_ISL_3935297, EPI_ISL_3935306, EPI_ISL_3935308, EPI_ISL_3935318, EPI_ISL_4545895, EPI_ISL_4545897, EPI_ISL_4545902, EPI_ISL_4545903, EPI_ISL_4545904, EPI_ISL_4545907, EPI_ISL_4545908, EPI_ISL_4545926, EPI_ISL_4545927, EPI_ISL_4545928, EPI_ISL_4545932, EPI_ISL_4545936, EPI_ISL_4545940, EPI_ISL_4545941, EPI_ISL_4545943, EPI_ISL_4546031, EPI_ISL_4546035, EPI_ISL_4546059, EPI_ISL_4546061, EPI_ISL_4546065, EPI_ISL_4546069, EPI_ISL_4546071, EPI_ISL_4546077, EPI_ISL_4546082, EPI_ISL_4546088, EPI_ISL_4546099, EPI_ISL_4546102, EPI_ISL_4546107, EPI_ISL_4546118, EPI_ISL_4546120, EPI_ISL_4546129, EPI_ISL_4546130, EPI_ISL_4546132, EPI_ISL_4546135, EPI_ISL_4546138, EPI_ISL_4546139, EPI_ISL_4546140, EPI_ISL_4546141, EPI_ISL_4546142, EPI_ISL_4546143, EPI_ISL_4546144, EPI_ISL_4546147, EPI_ISL_4546148, EPI_ISL_4546149, EPI_ISL_4546150, EPI_ISL_4546152, EPI_ISL_4546153, EPI_ISL_4546159, EPI_ISL_4546161, EPI_ISL_4546163, EPI_ISL_4546166, EPI_ISL_4546167, EPI_ISL_4546173, EPI_ISL_4546178, EPI_ISL_4546179, EPI_ISL_4546180, EPI_ISL_4546181, EPI_ISL_4546182, EPI_ISL_4546183, EPI_ISL_4546185, EPI_ISL_4546186, EPI_ISL_4546187, EPI_ISL_4546190, EPI_ISL_4546191, EPI_ISL_4546192, EPI_ISL_4546197, EPI_ISL_4546199, EPI_ISL_4546201, EPI_ISL_4546202, EPI_ISL_4546206, EPI_ISL_4546208, EPI_ISL_4546209, EPI_ISL_4546211, EPI_ISL_4546212, EPI_ISL_4546273, EPI_ISL_4546275, EPI_ISL_4546277, EPI_ISL_4546279, EPI_ISL_4546454, EPI_ISL_4546455, EPI_ISL_4546458, EPI_ISL_4546459, EPI_ISL_4546463, EPI_ISL_4546464, EPI_ISL_4546465, EPI_ISL_4546466, EPI_ISL_4546467, EPI_ISL_4546468, EPI_ISL_4546474, EPI_ISL_4546477, EPI_ISL_4546478, EPI_ISL_4546486, EPI_ISL_4546487, EPI_ISL_4546489, EPI_ISL_4546490, EPI_ISL_4546491, EPI_ISL_4546493, EPI_ISL_4546494, EPI_ISL_4546527, EPI_ISL_4546529, EPI_ISL_4546531, EPI_ISL_4546532, EPI_ISL_4546533, EPI_ISL_4546534, EPI_ISL_4546535, EPI_ISL_4546536, EPI_ISL_4546537, EPI_ISL_4546538, EPI_ISL_4546539, EPI_ISL_4546540, EPI_ISL_4546541, EPI_ISL_4546514, EPI_ISL_4546512, EPI_ISL_4546513, EPI_ISL_4546514, EPI_ISL_4546515, EPI_ISL_4546516, EPI_ISL_4546517, EPI_ISL_4546521, EPI_ISL_4546523, EPI_ISL_4546524, EPI_ISL_4546525, EPI_ISL_4546526, EPI_ISL_4546527, EPI_ISL_4546528, EPI_ISL_4546529, EPI_ISL_4546530, EPI_ISL_4546531, EPI_ISL_4546532, EPI_ISL_4546533, EPI_ISL_4546534, EPI_ISL_4546535, EPI_ISL_4546536, EPI_ISL_4546537, EPI_ISL_4546538, EPI_ISL_4546539, EPI_ISL_4546540, EPI_ISL_4546541, EPI_ISL_4546542, EPI_ISL_4546543, EPI_ISL_4546544 | AP SSO                                                                                    | CSIR-Centre for Cellular and Molecular Biology - INSACOG | ; Amreshwar Vodapalli; Ara Sreenivas; Archana Bharadwaj Siva; B Himasri; Divya Tej Sowpati; Jandhyala Sai Krishna; Karthik Bharadwaj Tallapaka; Krishna Khairnar; Lamuk Zaveri; Onkar Kulkarni; Payel Mukherjee; Priya Nurkurthy; Rakesh K Mishra; Shreekant Verma; Sofia Banu; Smedha Avadhanula; Tulasi Nagabandi; Valli Nagalakshmi Undamatla; Vidhyadhari Methuku |
| EPI_ISL_4129618                                                                                                                                                                                                                                                                                                                                                                                                                                                                                                                                                                                                                                                                                                                                                                                                                                                                                                                                                                                                                                                                                                                                                                                                                                                                                                                                                                                                                                                                                                                                                                                                                                                                                                                                                                                                                                                                                                                                                                                                                                                                                                                                                                                                                                                                                                                                                                                                                                                                                                                                                                                                                                                                                                                                                                                                                                                                                                                                                                                                                            | AURIGA LABS                                                                               | INSACOG-KA, NIMHANS                                      | Ananthapadmanabha Kotambail; Anita S Desai; Anson Kunjumon George; Chetan G K; Ellango Ramasamy; Gautham Arunachal Udipi; Mahesh Kumar.C.S; Sony Sharma; V Ravi                                                                                                                                                                                                       |
| EPI_ISL_4533541, EPI_ISL_4533932                                                                                                                                                                                                                                                                                                                                                                                                                                                                                                                                                                                                                                                                                                                                                                                                                                                                                                                                                                                                                                                                                                                                                                                                                                                                                                                                                                                                                                                                                                                                                                                                                                                                                                                                                                                                                                                                                                                                                                                                                                                                                                                                                                                                                                                                                                                                                                                                                                                                                                                                                                                                                                                                                                                                                                                                                                                                                                                                                                                                           | Ampligene Diagnostics Private Limited, Ahmedabad                                          | Gujarat Biotechnology Research Centre                    | Apurvashin Puvar; Arpit Shukla; Bhadreshsinh Gohil; Chaitanya Joshi; Chirag Pandya; Dinesh Kumar; Janvi Raval; Madhvi Joshi; Nimesh Patel; Nitin Savaliya; Nitin Shukla; Priyank Chavda; Ramesh Pandit; Sonal Sharma; Zarna Patel                                                                                                                                     |
| EPI_ISL_4533550                                                                                                                                                                                                                                                                                                                                                                                                                                                                                                                                                                                                                                                                                                                                                                                                                                                                                                                                                                                                                                                                                                                                                                                                                                                                                                                                                                                                                                                                                                                                                                                                                                                                                                                                                                                                                                                                                                                                                                                                                                                                                                                                                                                                                                                                                                                                                                                                                                                                                                                                                                                                                                                                                                                                                                                                                                                                                                                                                                                                                            | Apollo Hospital International Limited ,Bhat Gandhinagar                                   | Gujarat Biotechnology Research Centre                    | Apurvashin Puvar; Arpit Shukla; Bhadreshsinh Gohil; Chaitanya Joshi; Dinesh Kumar; Janvi Raval; Madhvi Joshi; Nimesh Patel; Nitin Savaliya; Nitin Shukla; Pankti Shah; Priyank Chavda; Ramesh Pandit; Sonal Sharma; Zarna Patel                                                                                                                                       |
| EPI_ISL_4129936, EPI_ISL_4129942                                                                                                                                                                                                                                                                                                                                                                                                                                                                                                                                                                                                                                                                                                                                                                                                                                                                                                                                                                                                                                                                                                                                                                                                                                                                                                                                                                                                                                                                                                                                                                                                                                                                                                                                                                                                                                                                                                                                                                                                                                                                                                                                                                                                                                                                                                                                                                                                                                                                                                                                                                                                                                                                                                                                                                                                                                                                                                                                                                                                           | BBMP Urban                                                                                | INSACOG-KA, NIMHANS                                      | Ananthapadmanabha Kotambail; Anita S Desai; Anson Kunjumon George; Chetan G K; Ellango Ramasamy; Gautham Arunachal Udipi; Mahesh Kumar.C.S; Sony Sharma; V Ravi                                                                                                                                                                                                       |
| EPI_ISL_4415454, EPI_ISL_4415455, EPI_ISL_4415456, EPI_ISL_4415459, EPI_ISL_4415460, EPI_ISL_4415462, EPI_ISL_4415464, EPI_ISL_4415466, EPI_ISL_4415468, EPI_ISL_4415470, EPI_ISL_4415472, EPI_ISL_4415474, EPI_ISL_4415476, EPI_ISL_4415479, EPI_ISL_4415480, EPI_ISL_4415481, EPI_ISL_4415483, EPI_ISL_4415484, EPI_ISL_4415489, EPI_ISL_4415490, EPI_ISL_4415493, EPI_ISL_4415494, EPI_ISL_4415495, EPI_ISL_4415499, EPI_ISL_4415501, EPI_ISL_4415502, EPI_ISL_4415503, EPI_ISL_4415509, EPI_ISL_4415510, EPI_ISL_4415511, EPI_ISL_4415512, EPI_ISL_4415513, EPI_ISL_4415514, EPI_ISL_4415515, EPI_ISL_4415516, EPI_ISL_4415519, EPI_ISL_4415520, EPI_ISL_4415522, EPI_ISL_4415523, EPI_ISL_4415524, EPI_ISL_4415525, EPI_ISL_4415526, EPI_ISL_4415529, EPI_ISL_4415530, EPI_ISL_4415532, EPI_ISL_4415533, EPI_ISL_4415534, EPI_ISL_4415535, EPI_ISL_4415560, EPI_ISL_4415563, EPI_ISL_4415573, EPI_ISL_4415580, EPI_ISL_4415581, EPI_ISL_4415607, EPI_ISL_4415612, EPI_ISL_4415619, EPI_ISL_4415620, EPI_ISL_4415622, EPI_ISL_4415623, EPI_ISL_4415624, EPI_ISL_4415626, EPI_ISL_4415627, EPI_ISL_4415628, EPI_ISL_4415643, EPI_ISL_4415648, EPI_ISL_4415649, EPI_ISL_4415651, EPI_ISL_4415652, EPI_ISL_4415653, EPI_ISL_4415654, EPI_ISL_4415655, EPI_ISL_4415659, EPI_ISL_4415660, EPI_ISL_4415661, EPI_ISL_4415662, EPI_ISL_4415663, EPI_ISL_4415664, EPI_ISL_4415665, EPI_ISL_4415666, EPI_ISL_4415667, EPI_ISL_4415668, EPI_ISL_4415669, EPI_ISL_4415671, EPI_ISL_4415689, EPI_ISL_4415692, EPI_ISL_4415695, EPI_ISL_4415696, EPI_ISL_4415697, EPI_ISL_4415698, EPI_ISL_4415699, EPI_ISL_4415700, EPI_ISL_4415702, EPI_ISL_4415712, EPI_ISL_4415713, EPI_ISL_4415719, EPI_ISL_4415720, EPI_ISL_4415723, EPI_ISL_4415724, EPI_ISL_4415738, EPI_ISL_4415742, EPI_ISL_4415744, EPI_ISL_4415746, EPI_ISL_4415755, EPI_ISL_4415756, EPI_ISL_4415759, EPI_ISL_4415763                                                                                                                                                                                                                                                                                                                                                                                                                                                                                                                                                                                                                                                                                                                                                                                                                                                                                                                                                                                                                                                                                                                                                                   | Aurnab Ghose; Joy Merwin Monteiro; Krishanpal Karmodiya; Rajesh Karyakarte; Suvarna Joshi |                                                          |                                                                                                                                                                                                                                                                                                                                                                       |
| EPI_ISL_4533554                                                                                                                                                                                                                                                                                                                                                                                                                                                                                                                                                                                                                                                                                                                                                                                                                                                                                                                                                                                                                                                                                                                                                                                                                                                                                                                                                                                                                                                                                                                                                                                                                                                                                                                                                                                                                                                                                                                                                                                                                                                                                                                                                                                                                                                                                                                                                                                                                                                                                                                                                                                                                                                                                                                                                                                                                                                                                                                                                                                                                            | Bhavsinhaji General Civil Hospital, Porbandar                                             | Gujarat Biotechnology Research Centre                    | Apurvashin Puvar; Arpit Shukla; Bhadreshsinh Gohil; Chaitanya Joshi; Dinesh Kumar; JD Parmar; Janvi Raval; Madhvi Joshi; Nimesh Patel; Nitin Savaliya; Nitin Shukla; Priyank Chavda; Ramesh Pandit; Sonal Sharma; Zarna Patel                                                                                                                                         |
| EPI_ISL_4546375                                                                                                                                                                                                                                                                                                                                                                                                                                                                                                                                                                                                                                                                                                                                                                                                                                                                                                                                                                                                                                                                                                                                                                                                                                                                                                                                                                                                                                                                                                                                                                                                                                                                                                                                                                                                                                                                                                                                                                                                                                                                                                                                                                                                                                                                                                                                                                                                                                                                                                                                                                                                                                                                                                                                                                                                                                                                                                                                                                                                                            | CSIR - Central Leather Research Institute                                                 | CSIR-Centre for Cellular and Molecular Biology - INSACOG | Amreshwar Vodapalli; Ara Sreenivas; Archana Bharadwaj Siva; B Himasri; Divya Tej Sowpati; Jandhyala Sai Krishna; Karthik Bharadwaj Tallapaka; Lamuk Zaveri; Onkar Kulkarni; Payel Mukherjee; Priya Nurkurthy; Rakesh K Mishra; Shreekant Verma; Sofia Banu; Smedha Avadhanula; Tulasi Nagabandi; Valli Nagalakshmi Undamatla; Vidhyadhari Methuku                     |
| EPI_ISL_4545952, EPI_ISL_4545953, EPI_ISL_4545954, EPI_ISL_4545955, EPI_ISL_4545956, EPI_ISL_4545956, EPI_ISL_4545974, EPI_ISL_4545975, EPI_ISL_4545976, EPI_ISL_4545976, EPI_ISL_4545984, EPI_ISL_4545985, EPI_ISL_4545987, EPI_ISL_4545994, EPI_ISL_4545997, EPI_ISL_4546004, EPI_ISL_4546005, EPI_ISL_4546007, EPI_ISL_4546015, EPI_ISL_4546017, EPI_ISL_4546018, EPI_ISL_4546022, EPI_ISL_4546029                                                                                                                                                                                                                                                                                                                                                                                                                                                                                                                                                                                                                                                                                                                                                                                                                                                                                                                                                                                                                                                                                                                                                                                                                                                                                                                                                                                                                                                                                                                                                                                                                                                                                                                                                                                                                                                                                                                                                                                                                                                                                                                                                                                                                                                                                                                                                                                                                                                                                                                                                                                                                                      | CSIR-Central Leather Research Institute                                                   | CSIR-Centre for Cellular and Molecular Biology - INSACOG | Amreshwar Vodapalli; Ara Sreenivas; Archana Bharadwaj Siva; B Himasri; Divya Tej Sowpati; Jandhyala Sai Krishna; Karthik Bharadwaj Tallapaka; Lamuk Zaveri; Onkar Kulkarni; Payel Mukherjee; Priya Nurkurthy; Rakesh K Mishra; Shreekant Verma; Sofia Banu; Smedha Avadhanula; Tulasi Nagabandi; Valli Nagalakshmi Undamatla; Vidhyadhari Methuku                     |
| EPI_ISL_3935130, EPI_ISL_3935226, EPI_ISL_4546040, EPI_ISL_4546052, EPI_ISL_4546075, EPI_ISL_4546232, EPI_ISL_4546450, EPI_ISL_4546451, EPI_ISL_4546452, EPI_ISL_4546533                                                                                                                                                                                                                                                                                                                                                                                                                                                                                                                                                                                                                                                                                                                                                                                                                                                                                                                                                                                                                                                                                                                                                                                                                                                                                                                                                                                                                                                                                                                                                                                                                                                                                                                                                                                                                                                                                                                                                                                                                                                                                                                                                                                                                                                                                                                                                                                                                                                                                                                                                                                                                                                                                                                                                                                                                                                                   | CSIR-Centre for Cellular and Molecular Biology - INSACOG                                  | CSIR-Centre for Cellular and Molecular Biology - INSACOG | Amreshwar Vodapalli; Ara Sreenivas; Archana Bharadwaj Siva; B Himasri; Divya Tej Sowpati; Jandhyala Sai Krishna; Karthik Bharadwaj Tallapaka; Krishna Khairnar; Lamuk Zaveri; Onkar Kulkarni; Payel Mukherjee; Priya Nurkurthy; Rakesh K Mishra; Shreekant Verma; Sofia Banu; Smedha Avadhanula; Tulasi Nagabandi; Valli Nagalakshmi Undamatla; Vidhyadhari Methuku   |
| EPI_ISL_4546032, EPI_ISL_4546043, EPI_ISL_4546044, EPI_ISL_4546055, EPI_ISL_4546068, EPI_ISL_4546070, EPI_ISL_4546080, EPI_ISL_4546092, EPI_ISL_4546093, EPI_ISL_4546105, EPI_ISL_4546116, EPI_ISL_4546382, EPI_ISL_4546384, EPI_ISL_4546386, EPI_ISL_4546393, EPI_ISL_4546395, EPI_ISL_4546402, EPI_ISL_4546403, EPI_ISL_4546411, EPI_ISL_4546412, EPI_ISL_4546413, EPI_ISL_4546414, EPI_ISL_4546424, EPI_ISL_4546431, EPI_ISL_4546432, EPI_ISL_4546441, EPI_ISL_4546442                                                                                                                                                                                                                                                                                                                                                                                                                                                                                                                                                                                                                                                                                                                                                                                                                                                                                                                                                                                                                                                                                                                                                                                                                                                                                                                                                                                                                                                                                                                                                                                                                                                                                                                                                                                                                                                                                                                                                                                                                                                                                                                                                                                                                                                                                                                                                                                                                                                                                                                                                                  | CSIR-National Environmental Engineering Research Institute                                | CSIR-Centre for Cellular and Molecular Biology - INSACOG | Amreshwar Vodapalli; Ara Sreenivas; Archana Bharadwaj Siva; B Himasri; Divya Tej Sowpati; Jandhyala Sai Krishna; Karthik Bharadwaj Tallapaka; Krishna Khairnar; Lamuk Zaveri; Onkar Kulkarni; Payel Mukherjee; Priya Nurkurthy; Rakesh K Mishra; Shreekant Verma; Sofia Banu; Smedha Avadhanula; Tulasi Nagabandi; Valli Nagalakshmi Undamatla; Vidhyadhari Methuku   |
| EPI_ISL_4415402, EPI_ISL_4415403, EPI_ISL_4415404, EPI_ISL_4415405, EPI_ISL_4415408, EPI_ISL_4415409, EPI_ISL_4415532, EPI_ISL_4415564, EPI_ISL_4415566, EPI_ISL_4415600, EPI_ISL_4415609, EPI_ISL_4415630, EPI_ISL_4415632, EPI_ISL_4415633, EPI_ISL_4415635, EPI_ISL_4415645, EPI_ISL_4415677, EPI_ISL_4415691, EPI_ISL_4415702, EPI_ISL_4415717, EPI_ISL_4415727, EPI_ISL_4415760                                                                                                                                                                                                                                                                                                                                                                                                                                                                                                                                                                                                                                                                                                                                                                                                                                                                                                                                                                                                                                                                                                                                                                                                                                                                                                                                                                                                                                                                                                                                                                                                                                                                                                                                                                                                                                                                                                                                                                                                                                                                                                                                                                                                                                                                                                                                                                                                                                                                                                                                                                                                                                                       | Department of Microbiology, Government Medical College, Baramati                          | IISER Pune-INSACOG                                       | Aurnab Ghose; Joy Merwin Monteiro; Krishanpal Karmodiya                                                                                                                                                                                                                                                                                                               |
| EPI_ISL_4533906, EPI_ISL_4533967                                                                                                                                                                                                                                                                                                                                                                                                                                                                                                                                                                                                                                                                                                                                                                                                                                                                                                                                                                                                                                                                                                                                                                                                                                                                                                                                                                                                                                                                                                                                                                                                                                                                                                                                                                                                                                                                                                                                                                                                                                                                                                                                                                                                                                                                                                                                                                                                                                                                                                                                                                                                                                                                                                                                                                                                                                                                                                                                                                                                           | Desai Metropolis Health Service Pvt. Ltd, surat                                           | Gujarat Biotechnology Research Centre                    | Apurvashin Puvar; Arpit Shukla; Bhadreshsinh Gohil; Chaitanya Joshi; Dinesh Kumar; Janvi Raval; Madhvi Joshi; Manali Shah; Nimesh Patel; Nitin Savaliya; Nitin Shukla; Priyank Chavda; Ramesh Pandit; Sonal Sharma; Zarna Patel                                                                                                                                       |
| EPI_ISL_4533930                                                                                                                                                                                                                                                                                                                                                                                                                                                                                                                                                                                                                                                                                                                                                                                                                                                                                                                                                                                                                                                                                                                                                                                                                                                                                                                                                                                                                                                                                                                                                                                                                                                                                                                                                                                                                                                                                                                                                                                                                                                                                                                                                                                                                                                                                                                                                                                                                                                                                                                                                                                                                                                                                                                                                                                                                                                                                                                                                                                                                            | Dr. Bhatt Lab, Rajkot                                                                     | Gujarat Biotechnology Research Centre                    | Apurvashin Puvar; Arpit Shukla; Bhadreshsinh Gohil; Chaitanya Joshi; Dinesh Kumar; Janvi Raval; Madhvi Joshi; Nimesh Patel; Nitin Savaliya; Nitin Shukla; Priyank Chavda; Ramesh Pandit; Sonal Sharma; Sonam Maniyar; Zarna Patel                                                                                                                                     |
| EPI_ISL_4104772, EPI_ISL_4104788, EPI_ISL_4104795, EPI_ISL_4104825                                                                                                                                                                                                                                                                                                                                                                                                                                                                                                                                                                                                                                                                                                                                                                                                                                                                                                                                                                                                                                                                                                                                                                                                                                                                                                                                                                                                                                                                                                                                                                                                                                                                                                                                                                                                                                                                                                                                                                                                                                                                                                                                                                                                                                                                                                                                                                                                                                                                                                                                                                                                                                                                                                                                                                                                                                                                                                                                                                         | GMERS Junagadh Medical College                                                            | Gujarat Biotechnology Research Centre                    | Arpit Shukla; Bhadreshsinh Gohil; Chaitanya Joshi; Dinesh Kumar; Janvi Raval; Madhvi Joshi; Nimesh Patel; Niraj Kumar Biswas; Nitin Savaliya; Nitin Shukla; Ramesh Pandit; Sonal Sharma; Twinkle Soni; Zarna Patel                                                                                                                                                    |
| EPI_ISL_4533927                                                                                                                                                                                                                                                                                                                                                                                                                                                                                                                                                                                                                                                                                                                                                                                                                                                                                                                                                                                                                                                                                                                                                                                                                                                                                                                                                                                                                                                                                                                                                                                                                                                                                                                                                                                                                                                                                                                                                                                                                                                                                                                                                                                                                                                                                                                                                                                                                                                                                                                                                                                                                                                                                                                                                                                                                                                                                                                                                                                                                            | GMERS Medical College, Gandhinagar                                                        | Gujarat Biotechnology Research Centre                    | Apurvashin Puvar; Arpit Shukla; Bhadreshsinh Gohil; Chaitanya Joshi; Dinesh Kumar; Gaurishankar Shirmali; Janvi Raval; Madhvi Joshi; Nimesh Patel; Nitin Savaliya; Nitin Shukla; Priyank Chavda; Ramesh Pandit; Sonal Sharma; Zarna Patel                                                                                                                             |
| EPI_ISL_4104777, EPI_ISL_4104812, EPI_ISL_4104813                                                                                                                                                                                                                                                                                                                                                                                                                                                                                                                                                                                                                                                                                                                                                                                                                                                                                                                                                                                                                                                                                                                                                                                                                                                                                                                                                                                                                                                                                                                                                                                                                                                                                                                                                                                                                                                                                                                                                                                                                                                                                                                                                                                                                                                                                                                                                                                                                                                                                                                                                                                                                                                                                                                                                                                                                                                                                                                                                                                          | GMERS Medical College, Valsad                                                             | Gujarat Biotechnology Research Centre                    | Arpit Shukla; Bhadreshsinh Gohil; Chaitanya Joshi; Dinesh Kumar; Janvi Raval; Madhvi Joshi; Nimesh Patel; Nitin Savaliya; Nitin Shukla; Ramesh Pandit; Sonal Sharma; Twinkle Soni; Vicky Gandhi; Zarna Patel                                                                                                                                                          |
| EPI_ISL_4058069, EPI_ISL_4058071, EPI_ISL_4058073, EPI_ISL_4058074, EPI_ISL_4058076, EPI_ISL_4058078, EPI_ISL_4058079, EPI_ISL_4058081, EPI_ISL_4058083, EPI_ISL_4058086                                                                                                                                                                                                                                                                                                                                                                                                                                                                                                                                                                                                                                                                                                                                                                                                                                                                                                                                                                                                                                                                                                                                                                                                                                                                                                                                                                                                                                                                                                                                                                                                                                                                                                                                                                                                                                                                                                                                                                                                                                                                                                                                                                                                                                                                                                                                                                                                                                                                                                                                                                                                                                                                                                                                                                                                                                                                   | Gandhi Hospital                                                                           | CFDF                                                     | Ashwin Dalal; Asmita Gupta; Divya Vashisht; Murali Bhashyam; Nagamani Kammili; Vinay Donipadi                                                                                                                                                                                                                                                                         |
| EPI_ISL_4058052, EPI_ISL_4058056, EPI_ISL_4058068, EPI_ISL_4058148, EPI_ISL_4058175, EPI_ISL_4058231, EPI_ISL_4058203, EPI_ISL_4058238, EPI_ISL_4058240                                                                                                                                                                                                                                                                                                                                                                                                                                                                                                                                                                                                                                                                                                                                                                                                                                                                                                                                                                                                                                                                                                                                                                                                                                                                                                                                                                                                                                                                                                                                                                                                                                                                                                                                                                                                                                                                                                                                                                                                                                                                                                                                                                                                                                                                                                                                                                                                                                                                                                                                                                                                                                                                                                                                                                                                                                                                                    | Gandhi Medical College                                                                    | CFDF                                                     | Ashwin Dalal; Asmita Gupta; Divya Vashisht; Murali Bhashyam; Nagamani Kammili; Vinay Donipadi                                                                                                                                                                                                                                                                         |
| EPI_ISL_4104822                                                                                                                                                                                                                                                                                                                                                                                                                                                                                                                                                                                                                                                                                                                                                                                                                                                                                                                                                                                                                                                                                                                                                                                                                                                                                                                                                                                                                                                                                                                                                                                                                                                                                                                                                                                                                                                                                                                                                                                                                                                                                                                                                                                                                                                                                                                                                                                                                                                                                                                                                                                                                                                                                                                                                                                                                                                                                                                                                                                                                            | General Hospital, Chotaudaipur                                                            | Gujarat Biotechnology Research Centre                    | Arpit Shukla; Atri Thakur; Bhadreshsinh Gohil; Chaitanya Joshi; Dinesh Kumar; Janvi Raval; Madhvi Joshi; Nimesh Patel; Nitin Savaliya; Nitin Shukla; Ramesh Pandit; Sonal Sharma; Twinkle Soni; Zarna Patel                                                                                                                                                           |
| EPI_ISL_4104776, EPI_ISL_4104781, EPI_ISL_4104782, EPI_ISL_4104783, EPI_ISL_4104833                                                                                                                                                                                                                                                                                                                                                                                                                                                                                                                                                                                                                                                                                                                                                                                                                                                                                                                                                                                                                                                                                                                                                                                                                                                                                                                                                                                                                                                                                                                                                                                                                                                                                                                                                                                                                                                                                                                                                                                                                                                                                                                                                                                                                                                                                                                                                                                                                                                                                                                                                                                                                                                                                                                                                                                                                                                                                                                                                        | Government Medical College, Bhavnagar                                                     | Gujarat Biotechnology Research Centre                    | Arpit Shukla; Bhadreshsinh Gohil; Chaitanya Joshi; Dinesh Kumar; Janvi Raval; Kairavi Jwalantbhai Desai; Madhvi Joshi; Nimesh Patel; Nitin Savaliya; Nitin Shukla; Ramesh Pandit; Sonal Sharma; Twinkle Soni; Zarna Patel                                                                                                                                             |
| EPI_ISL_4058091, EPI_ISL_4058093, EPI_ISL_4058101, EPI_ISL_4058103, EPI_ISL_4058104, EPI_ISL_4058109, EPI_ISL_4058192, EPI_ISL_4058196, EPI_ISL_4058198, EPI_ISL_4058199                                                                                                                                                                                                                                                                                                                                                                                                                                                                                                                                                                                                                                                                                                                                                                                                                                                                                                                                                                                                                                                                                                                                                                                                                                                                                                                                                                                                                                                                                                                                                                                                                                                                                                                                                                                                                                                                                                                                                                                                                                                                                                                                                                                                                                                                                                                                                                                                                                                                                                                                                                                                                                                                                                                                                                                                                                                                   | Government Fever Hospital                                                                 | CFDF                                                     | Ashwin Dalal; Asmita Gupta; Divya Vashisht; Murali Bhashyam; Nagamani Kammili; Vinay Donipadi                                                                                                                                                                                                                                                                         |
| EPI_ISL_4058205, EPI_ISL_4058211, EPI_ISL_4058213, EPI_ISL_4058215, EPI_ISL_4058217, EPI_ISL_4058218, EPI_ISL_4058220, EPI_ISL_4058222, EPI_ISL_4058223                                                                                                                                                                                                                                                                                                                                                                                                                                                                                                                                                                                                                                                                                                                                                                                                                                                                                                                                                                                                                                                                                                                                                                                                                                                                                                                                                                                                                                                                                                                                                                                                                                                                                                                                                                                                                                                                                                                                                                                                                                                                                                                                                                                                                                                                                                                                                                                                                                                                                                                                                                                                                                                                                                                                                                                                                                                                                    | Government General Hospital                                                               | CFDF                                                     | Ashwin Dalal; Asmita Gupta; Divya Vashisht; Murali Bhashyam; Nagamani Kammili; Vinay Donipadi                                                                                                                                                                                                                                                                         |
| EPI_ISL_3507489, EPI_ISL_3507499, EPI_ISL_3507500, EPI_ISL_3507501                                                                                                                                                                                                                                                                                                                                                                                                                                                                                                                                                                                                                                                                                                                                                                                                                                                                                                                                                                                                                                                                                                                                                                                                                                                                                                                                                                                                                                                                                                                                                                                                                                                                                                                                                                                                                                                                                                                                                                                                                                                                                                                                                                                                                                                                                                                                                                                                                                                                                                                                                                                                                                                                                                                                                                                                                                                                                                                                                                         | Government General Hospital                                                               | Centre for DNA Fingerprinting and Diagnostics            | Ashwin Dalal; Asmita Gupta; Divya Vashisht; Murali Bhashyam; Nagamani Kammili; Reelina Basu; Vinay Donipadi                                                                                                                                                                                                                                                           |
| EPI_ISL_4058061, EPI_ISL_4058062, EPI_ISL_4058064, EPI_ISL_4058066, EPI_ISL_4058174, EPI_ISL_4058245, EPI_ISL_4058250, EPI_ISL_4058252                                                                                                                                                                                                                                                                                                                                                                                                                                                                                                                                                                                                                                                                                                                                                                                                                                                                                                                                                                                                                                                                                                                                                                                                                                                                                                                                                                                                                                                                                                                                                                                                                                                                                                                                                                                                                                                                                                                                                                                                                                                                                                                                                                                                                                                                                                                                                                                                                                                                                                                                                                                                                                                                                                                                                                                                                                                                                                     | Government Maternity Hospital                                                             | CFDF                                                     | Ashwin Dalal; Asmita Gupta; Divya Vashisht; Murali Bhashyam; Nagamani Kammili; Vinay Donipadi                                                                                                                                                                                                                                                                         |
| EPI_ISL_4533959, EPI_ISL_4533960                                                                                                                                                                                                                                                                                                                                                                                                                                                                                                                                                                                                                                                                                                                                                                                                                                                                                                                                                                                                                                                                                                                                                                                                                                                                                                                                                                                                                                                                                                                                                                                                                                                                                                                                                                                                                                                                                                                                                                                                                                                                                                                                                                                                                                                                                                                                                                                                                                                                                                                                                                                                                                                                                                                                                                                                                                                                                                                                                                                                           | Green Cross Pathology & Molecular Laboratory                                              | Gujarat Biotechnology Research Centre                    | Apurvashin Puvar; Arpit Shukla; Bhadreshsinh Gohil; Chaitanya Joshi; Dinesh Kumar; Janvi Raval; Madhvi Joshi; Narendra M Patel; Nimesh Patel; Nitin Savaliya; Nitin Shukla; Priyank Chavda; Ramesh Pandit; Sonal Sharma; Zarna Patel                                                                                                                                  |
| EPI_ISL_4104824                                                                                                                                                                                                                                                                                                                                                                                                                                                                                                                                                                                                                                                                                                                                                                                                                                                                                                                                                                                                                                                                                                                                                                                                                                                                                                                                                                                                                                                                                                                                                                                                                                                                                                                                                                                                                                                                                                                                                                                                                                                                                                                                                                                                                                                                                                                                                                                                                                                                                                                                                                                                                                                                                                                                                                                                                                                                                                                                                                                                                            | Green Cross Pathology & Molecular Laboratory, Ahmedabad                                   | Gujarat Biotechnology Research Centre                    | Arpit Shukla; Bhadreshsinh Gohil; Chaitanya Joshi; Dinesh Kumar; Janvi Raval; Madhvi Joshi; Narendra Patel; Nimesh Patel; Nitin Savaliya; Nitin Shukla; Ramesh Pandit; Sonal Sharma; Twinkle Soni; Zarna Patel                                                                                                                                                        |
| EPI_ISL_3717583                                                                                                                                                                                                                                                                                                                                                                                                                                                                                                                                                                                                                                                                                                                                                                                                                                                                                                                                                                                                                                                                                                                                                                                                                                                                                                                                                                                                                                                                                                                                                                                                                                                                                                                                                                                                                                                                                                                                                                                                                                                                                                                                                                                                                                                                                                                                                                                                                                                                                                                                                                                                                                                                                                                                                                                                                                                                                                                                                                                                                            | Green Cross Pathology and Molecular Laboratory, Ahmedabad                                 | Gujarat Biotechnology Research Centre                    | Arpit Shukla; Bhadreshsinh Gohil; Chaitanya Joshi; Dinesh Kumar; Janvi Raval; Madhvi Joshi; Narendra Patel; Nimesh Patel; Nitin Savaliya; Nitin Shukla; Ramesh Pandit; Sonal Sharma; Twinkle Soni; Zarna Patel                                                                                                                                                        |
| EPI_ISL_4533937, EPI_ISL_4533938, EPI_ISL_4533939, EPI_ISL_4533940, EPI_ISL_4533941, EPI_ISL_4533942                                                                                                                                                                                                                                                                                                                                                                                                                                                                                                                                                                                                                                                                                                                                                                                                                                                                                                                                                                                                                                                                                                                                                                                                                                                                                                                                                                                                                                                                                                                                                                                                                                                                                                                                                                                                                                                                                                                                                                                                                                                                                                                                                                                                                                                                                                                                                                                                                                                                                                                                                                                                                                                                                                                                                                                                                                                                                                                                       | Green cross Genetic Lab Pvt. Ltd, Ahmedabad                                               | Gujarat Biotechnology Research Centre                    | Apurvashin Puvar; Arpit Shukla; Bhadreshsinh Gohil; Chaitanya Joshi; Dinesh Kumar; Janvi Raval; Madhvi Joshi; Nimesh Patel; Nitin Savaliya; Nitin Shukla; Priyank Chavda; Ramesh Pandit; Sonal Sharma; Umang Patel; Zarna Patel                                                                                                                                       |
| EPI_ISL_4533923, EPI_ISL_4533924                                                                                                                                                                                                                                                                                                                                                                                                                                                                                                                                                                                                                                                                                                                                                                                                                                                                                                                                                                                                                                                                                                                                                                                                                                                                                                                                                                                                                                                                                                                                                                                                                                                                                                                                                                                                                                                                                                                                                                                                                                                                                                                                                                                                                                                                                                                                                                                                                                                                                                                                                                                                                                                                                                                                                                                                                                                                                                                                                                                                           | Gujarat Pathology Laboratory, Ahmedabad                                                   | Gujarat Biotechnology Research Centre                    | Apurvashin Puvar; Arpit Shukla; Bhadreshsinh Gohil; Chaitanya Joshi; Dinesh Kumar; Janvi Raval; Madhvi Joshi; Nimesh Patel; Niraj Kothari; Nitin Savaliya; Nitin Shukla; Priyank Chavda; Ramesh Pandit; Sonal Sharma; Zarna Patel                                                                                                                                     |
| EPI_ISL_4129745, EPI_ISL_4129747                                                                                                                                                                                                                                                                                                                                                                                                                                                                                                                                                                                                                                                                                                                                                                                                                                                                                                                                                                                                                                                                                                                                                                                                                                                                                                                                                                                                                                                                                                                                                                                                                                                                                                                                                                                                                                                                                                                                                                                                                                                                                                                                                                                                                                                                                                                                                                                                                                                                                                                                                                                                                                                                                                                                                                                                                                                                                                                                                                                                           | Hassan Institute of Medical Sciences                                                      | INSACOG-KA, NIMHANS                                      | Ananthapadmanabha Kotambail; Anita S Desai; Anson Kunjumon George; Chetan G K; Ellango Ramasamy; Gautham Arunachal Udipi; Mahesh Kumar.C.S; Sony Sharma; V Ravi                                                                                                                                                                                                       |
| EPI_ISL_3533110, EPI_ISL_3533111, EPI_ISL_3533112, EPI_ISL_3533115, EPI_ISL_3533116, EPI_ISL_3982433, EPI_ISL_3982437, EPI_ISL_3982438, EPI_ISL_3982439, EPI_ISL_3982440, EPI_ISL_3982441, EPI_ISL_3982442, EPI_ISL_3982443, EPI_ISL_3982444, EPI_ISL_3982445, EPI_ISL_3982446, EPI_ISL_3982447, EPI_ISL_3982448, EPI_ISL_3982449, EPI_ISL_3982450, EPI_ISL_3982451, EPI_ISL_3982452, EPI_ISL_3982453, EPI_ISL_3982454, EPI_ISL_3982455, EPI_ISL_3982456, EPI_ISL_3982457, EPI_ISL_3982458, EPI_ISL_3982459, EPI_ISL_3982460, EPI_ISL_3982461, EPI_ISL_3982462, EPI_ISL_3982463, EPI_ISL_3982465, EPI_ISL_3982466, EPI_ISL_3982467, EPI_ISL_3982468, EPI_ISL_3982469, EPI_ISL_3982470, EPI_ISL_3982475, EPI_ISL_3982478, EPI_ISL_3982479, EPI_ISL_3982480, EPI_ISL_3982481, EPI_ISL_3982482, EPI_ISL_3982483, EPI_ISL_3982485, EPI_ISL_3982486, EPI_ISL_3982487, EPI_ISL_3982487, EPI_ISL_3982489, EPI_ISL_3982490, EPI_ISL_3982495, EPI_ISL_3982497, EPI_ISL_3982498, EPI_ISL_3982499, EPI_ISL_3982500, EPI_ISL_3982502, EPI_ISL_3982503, EPI_ISL_3982504, EPI_ISL_3982506, EPI_ISL_3982507, EPI_ISL_3982508, EPI_ISL_3982509, EPI_ISL_3982510, EPI_ISL_3982511, EPI_ISL_3982512,                                                                                                                                                                                                                                                                                                                                                                                                                                                                                                                                                                                                                                                                                                                                                                                                                                                                                                                                                                                                                                                                                                                                                                                                                                                                                                                                                                                                                                                                                                                                                                                                                                                                                                                                                                                                                                                         |                                                                                           |                                                          |                                                                                                                                                                                                                                                                                                                                                                       |



|                                                                                                                                                                                                                                                                                                                                                                                                                                                                                                                                                                                                                                                                                                                                                                                                                                                                                                                                                                                                                                                                                                                                                                                                                                      |                                                                                               |                                           |                                                                                                                                                                                                                                                          |
|--------------------------------------------------------------------------------------------------------------------------------------------------------------------------------------------------------------------------------------------------------------------------------------------------------------------------------------------------------------------------------------------------------------------------------------------------------------------------------------------------------------------------------------------------------------------------------------------------------------------------------------------------------------------------------------------------------------------------------------------------------------------------------------------------------------------------------------------------------------------------------------------------------------------------------------------------------------------------------------------------------------------------------------------------------------------------------------------------------------------------------------------------------------------------------------------------------------------------------------|-----------------------------------------------------------------------------------------------|-------------------------------------------|----------------------------------------------------------------------------------------------------------------------------------------------------------------------------------------------------------------------------------------------------------|
| EPI_ISL_4533956, EPI_ISL_4533957                                                                                                                                                                                                                                                                                                                                                                                                                                                                                                                                                                                                                                                                                                                                                                                                                                                                                                                                                                                                                                                                                                                                                                                                     | Scientific Diagnostic Centre Pvt. Ltd.,<br>Ahmedabad                                          | Gujarat Biotechnology Research<br>Centre  | Apurvasinh Puvar; Arpit Shukla; Bhadreshsinh Gohil; Chaitanya Joshi; Dinesh Kumar; Janvi Raval; Madhvi Joshi; Moksha B Narechania; Nimesh Patel; Nitin Savaliya; Nitin Shukla; Priyank Chavda; Ramesh Pandit; Sonal Sharma; Zarna Patel                  |
| EPI_ISL_3948556, EPI_ISL_4533921                                                                                                                                                                                                                                                                                                                                                                                                                                                                                                                                                                                                                                                                                                                                                                                                                                                                                                                                                                                                                                                                                                                                                                                                     | Shraddhadeep Green Cross Pathology<br>Laboratory, Gandhinagar                                 | Gujarat Biotechnology Research<br>Centre  | Apurvasinh Puvar; Arpit Shukla; Bhadreshsinh Gohil; Chaitanya Joshi; Dinesh Kumar; Dinesh Rathod; Janvi Raval; Madhvi Joshi; Nimesh Patel; Nitin Savaliya; Nitin Shukla; Priyank Chavda; Ramesh Pandit; Sonal Sharma; Twinkle Soni; Zarna Patel          |
| EPI_ISL_4533911, EPI_ISL_4533912, EPI_ISL_4533913, EPI_ISL_4533914, EPI_ISL_4533915, EPI_ISL_4533916, EPI_ISL_4533917                                                                                                                                                                                                                                                                                                                                                                                                                                                                                                                                                                                                                                                                                                                                                                                                                                                                                                                                                                                                                                                                                                                | Smimer Medical College ,Surat                                                                 | Gujarat Biotechnology Research<br>Centre  | Apurvasinh Puvar; Arpit Shukla; Bhadreshsinh Gohil; Chaitanya Joshi; Dinesh Kumar; Janvi Raval; Madhvi Joshi; Manish Patel; Nimesh Patel; Nitin Savaliya; Nitin Shukla; Priyank Chavda; Ramesh Pandit; Sonal Sharma; Zarna Patel                         |
| EPI_ISL_4533543, EPI_ISL_4533951, EPI_ISL_4533952,<br>EPI_ISL_4533953, EPI_ISL_4533954                                                                                                                                                                                                                                                                                                                                                                                                                                                                                                                                                                                                                                                                                                                                                                                                                                                                                                                                                                                                                                                                                                                                               | Sterling Accuris, Bhavnagar                                                                   | Gujarat Biotechnology Research<br>Centre  | Apurvasinh Puvar; Arpit Shukla; Bhadreshsinh Gohil; Chaitanya Joshi; Dinesh Kumar; Hemal Salot; Janvi Raval; Madhvi Joshi; Nimesh Patel; Nitin Savaliya; Nitin Shukla; Priyank Chavda; Ramesh Pandit; Sonal Sharma; Zarna Patel                          |
| EPI_ISL_4533955                                                                                                                                                                                                                                                                                                                                                                                                                                                                                                                                                                                                                                                                                                                                                                                                                                                                                                                                                                                                                                                                                                                                                                                                                      | Sunflower Laboratory, Ahmedabad                                                               | Gujarat Biotechnology Research<br>Centre  | Apurvasinh Puvar; Arpit Shukla; Bhadreshsinh Gohil; Chaitanya Joshi; Dinesh Kumar; Janvi Raval; Madhvi Joshi; Mantrik Kaur; Nimesh Patel; Nitin Savaliya; Nitin Shukla; Priyank Chavda; Ramesh Pandit; Sonal Sharma; Zarna Patel                         |
| EPI_ISL_3948549, EPI_ISL_3948550, EPI_ISL_3948551, EPI_ISL_3948552, EPI_ISL_3948555, EPI_ISL_4104775, EPI_ISL_4104778, EPI_ISL_4104779, EPI_ISL_4104780, EPI_ISL_4104814, EPI_ISL_4533545, EPI_ISL_4533548, EPI_ISL_4533974, EPI_ISL_4533975, EPI_ISL_4533977                                                                                                                                                                                                                                                                                                                                                                                                                                                                                                                                                                                                                                                                                                                                                                                                                                                                                                                                                                        | Supratech Micropath Laboratory Research<br>Institute Pvt Ltd, Ahmedabad                       | Gujarat Biotechnology Research<br>Centre  | Apurvasinh Puvar; Arpit Shukla; Bhadreshsinh Gohil; Chaitanya Joshi; Dinesh Kumar; Janvi Raval; Madhvi Joshi; Mahendra Parikh; Nimesh Patel; Nitin Savaliya; Nitin Shukla; Priyank Chavda; Ramesh Pandit; Shiva; Sonal Sharma; Twinkle Soni; Zarna Patel |
| EPI_ISL_4104786, EPI_ISL_4104787, EPI_ISL_4533542, EPI_ISL_4533943, EPI_ISL_4533947, EPI_ISL_4533948, EPI_ISL_4533950                                                                                                                                                                                                                                                                                                                                                                                                                                                                                                                                                                                                                                                                                                                                                                                                                                                                                                                                                                                                                                                                                                                | Toprani Advance Lab system,Vadodara                                                           | Gujarat Biotechnology Research<br>Centre  | Apurvasinh Puvar; Arpit Shukla; Bhadreshsinh Gohil; Chaitanya Joshi; Dinesh Kumar; Janvi Raval; Madhvi Joshi; Nimesh Patel; Nitin Savaliya; Nitin Shukla; Priyank Chavda; Ramesh Pandit; Sonal Sharma; Tushar Toprani; Twinkle Soni; Zarna Patel         |
| EPI_ISL_4415442, EPI_ISL_4415443, EPI_ISL_4415444, EPI_ISL_4415445, EPI_ISL_4415446, EPI_ISL_4415449, EPI_ISL_4415451, EPI_ISL_4415452, EPI_ISL_4415544, EPI_ISL_4415552, EPI_ISL_4415554, EPI_ISL_4415558, EPI_ISL_4415559, EPI_ISL_4415562, EPI_ISL_4415565, EPI_ISL_4415568, EPI_ISL_4415569, EPI_ISL_4415570, EPI_ISL_4415571, EPI_ISL_4415576, EPI_ISL_4415577, EPI_ISL_4415582, EPI_ISL_4415583, EPI_ISL_4415584, EPI_ISL_4415586, EPI_ISL_4415588, EPI_ISL_4415590, EPI_ISL_4415595, EPI_ISL_4415596, EPI_ISL_4415603, EPI_ISL_4415611, EPI_ISL_4415615, EPI_ISL_4415617, EPI_ISL_4415625, EPI_ISL_4415630, EPI_ISL_4415637, EPI_ISL_4415654, EPI_ISL_4415656, EPI_ISL_4415662, EPI_ISL_4415663, EPI_ISL_4415665, EPI_ISL_4415668, EPI_ISL_4415670, EPI_ISL_4415682, EPI_ISL_4415687, EPI_ISL_4415688, EPI_ISL_4415690, EPI_ISL_4415693, EPI_ISL_4415694, EPI_ISL_4415701, EPI_ISL_4415703, EPI_ISL_4415705, EPI_ISL_4415709, EPI_ISL_4415710, EPI_ISL_4415716, EPI_ISL_4415718, EPI_ISL_4415725, EPI_ISL_4415726, EPI_ISL_4415728, EPI_ISL_4415729, EPI_ISL_4415740, EPI_ISL_4415743, EPI_ISL_4415745, EPI_ISL_4415750, EPI_ISL_4415752, EPI_ISL_4415754, EPI_ISL_4415758, EPI_ISL_4415761, EPI_ISL_4415762, EPI_ISL_4415764 | Virus Research & Diagnostic Laboratory<br>bangalore Medical college and Research<br>Institute | IISER Pune-INSACOG<br>INSACOG-KA, NIMHANS | Aurnab Ghose; Joy Merwin Monteiro; Krishanpal Karmodiya<br>Ananthapadmanabha Kotambail; Anita S Desai; Anson Kunjumon George; Chetan G K; Ellango Ramasamy; Gautham Arunachal Udupi; Mahesh Kumar.C.S; Sony Sharma; V Ravi                               |
| EPI_ISL_4129648                                                                                                                                                                                                                                                                                                                                                                                                                                                                                                                                                                                                                                                                                                                                                                                                                                                                                                                                                                                                                                                                                                                                                                                                                      |                                                                                               |                                           |                                                                                                                                                                                                                                                          |
