# Supplementary material for: SARS-COV-2 δ variant drives the pandemic in India and Europe via two subvariants
Source: bioRxiv or medRxiv preprint supplement (doi:10.1101/2021.10.16.21265096), 2021-10-20
Supplement: Supplementary file [file media-14.pdf]

We gratefully acknowledge the following Authors from the Originating laboratories responsible for obtaining the specimens, as well as the Submitting laboratories where the genome data were generated and shared via GISAID, on which this research is based.

All Submitters of data may be contacted directly via [www.gisaid.org](http://www.gisaid.org)

Authors are sorted alphabetically.

| Accession ID                                                                                                                                                                                                                                                                                                                                                                                                                                                                                                                                                                                                                                                                                                                                                                                                                                                                                                                                                                                                                                                                                                                                                                                                                                                                                                                                                                                                                                                                                                                                                                                                                                                                                                                                                                                                                                                                                                                                                                                                                                                                                                                                                                                                                                                                                                                                                                                                                                                                                                                                                                                                                                                                                                                                                                                                                                                                                                                                                                                                                                                                                                                                                                                                                                                                                                                                                                                                                                                                                                                                                                                                                                                                                                                                                                                                                                                                                                                                                                                                                                                                                                                                                                                                                                                                                                                                                                                                                                                                                                                                                                                                                                                                                                                                                                                                                                                                                                                                                                                                                                                                                                                                                                                                                                                                                                                                                                                                                                                                                                                                                                                                                                                                                                                                                                                                                                                                                                                                                                                                                                                                                                                                                                                                                                                                                                                                                                                                                                                                                                                                                                                                                                                                                                                                                                                                                                                                                                                                                                                                                                                                                                                                                                                                                                                                                                                                                                                                                                                                                                                                                                                                                                                                                                                                                                                                                                                                                                                                                                                                                                                                                                                                                                                                                                                                                                                                                                                                                                                                                                                                                                                                                                                                                                                                                                                                                                                                                                                                                                                                                                                                                                                                                                                                                                                                                                                                                                                                                                                                                                                                                                                                                                                                                                                                                                                                                                                                                                                                                                                                                                                                                                                                                                                                                                                                                                                                                                                                                                                                                                                                                                                                                                                                                                        | Originating Laboratory                                                                                                                                                                                                                                                               | Submitting Laboratory                                                                                                                                                                                                                                                          | Authors                                                                                                                                                                                                                                                                                                                                                                              |
|---------------------------------------------------------------------------------------------------------------------------------------------------------------------------------------------------------------------------------------------------------------------------------------------------------------------------------------------------------------------------------------------------------------------------------------------------------------------------------------------------------------------------------------------------------------------------------------------------------------------------------------------------------------------------------------------------------------------------------------------------------------------------------------------------------------------------------------------------------------------------------------------------------------------------------------------------------------------------------------------------------------------------------------------------------------------------------------------------------------------------------------------------------------------------------------------------------------------------------------------------------------------------------------------------------------------------------------------------------------------------------------------------------------------------------------------------------------------------------------------------------------------------------------------------------------------------------------------------------------------------------------------------------------------------------------------------------------------------------------------------------------------------------------------------------------------------------------------------------------------------------------------------------------------------------------------------------------------------------------------------------------------------------------------------------------------------------------------------------------------------------------------------------------------------------------------------------------------------------------------------------------------------------------------------------------------------------------------------------------------------------------------------------------------------------------------------------------------------------------------------------------------------------------------------------------------------------------------------------------------------------------------------------------------------------------------------------------------------------------------------------------------------------------------------------------------------------------------------------------------------------------------------------------------------------------------------------------------------------------------------------------------------------------------------------------------------------------------------------------------------------------------------------------------------------------------------------------------------------------------------------------------------------------------------------------------------------------------------------------------------------------------------------------------------------------------------------------------------------------------------------------------------------------------------------------------------------------------------------------------------------------------------------------------------------------------------------------------------------------------------------------------------------------------------------------------------------------------------------------------------------------------------------------------------------------------------------------------------------------------------------------------------------------------------------------------------------------------------------------------------------------------------------------------------------------------------------------------------------------------------------------------------------------------------------------------------------------------------------------------------------------------------------------------------------------------------------------------------------------------------------------------------------------------------------------------------------------------------------------------------------------------------------------------------------------------------------------------------------------------------------------------------------------------------------------------------------------------------------------------------------------------------------------------------------------------------------------------------------------------------------------------------------------------------------------------------------------------------------------------------------------------------------------------------------------------------------------------------------------------------------------------------------------------------------------------------------------------------------------------------------------------------------------------------------------------------------------------------------------------------------------------------------------------------------------------------------------------------------------------------------------------------------------------------------------------------------------------------------------------------------------------------------------------------------------------------------------------------------------------------------------------------------------------------------------------------------------------------------------------------------------------------------------------------------------------------------------------------------------------------------------------------------------------------------------------------------------------------------------------------------------------------------------------------------------------------------------------------------------------------------------------------------------------------------------------------------------------------------------------------------------------------------------------------------------------------------------------------------------------------------------------------------------------------------------------------------------------------------------------------------------------------------------------------------------------------------------------------------------------------------------------------------------------------------------------------------------------------------------------------------------------------------------------------------------------------------------------------------------------------------------------------------------------------------------------------------------------------------------------------------------------------------------------------------------------------------------------------------------------------------------------------------------------------------------------------------------------------------------------------------------------------------------------------------------------------------------------------------------------------------------------------------------------------------------------------------------------------------------------------------------------------------------------------------------------------------------------------------------------------------------------------------------------------------------------------------------------------------------------------------------------------------------------------------------------------------------------------------------------------------------------------------------------------------------------------------------------------------------------------------------------------------------------------------------------------------------------------------------------------------------------------------------------------------------------------------------------------------------------------------------------------------------------------------------------------------------------------------------------------------------------------------------------------------------------------------------------------------------------------------------------------------------------------------------------------------------------------------------------------------------------------------------------------------------------------------------------------------------------------------------------------------------------------------------------------------------------------------------------------------------------------------------------------------------------------------------------------------------------------------------------------------------------------------------------------------------------------------------------------------------------------------------------------------------------------------------------------------------------------------------------------------------------------------------------------------------------------------------------------------------------------------------------------------------------------------------------------------------------------------------------------------------------------------------------------------------------------------------------------------------------------------------------------------------------------------------------------------------------------------------------------------------------------------------------------------------------------------------------------------------------------------------------------------------------------------------------------------------------------------------------------------------------------------------------------------------------------------------------------------------------------------------------------------------------------------------------------------------------------------------------------------------------------------------------------------------------------------------------------------------------------------------------------------------------------------------------|--------------------------------------------------------------------------------------------------------------------------------------------------------------------------------------------------------------------------------------------------------------------------------------|--------------------------------------------------------------------------------------------------------------------------------------------------------------------------------------------------------------------------------------------------------------------------------|--------------------------------------------------------------------------------------------------------------------------------------------------------------------------------------------------------------------------------------------------------------------------------------------------------------------------------------------------------------------------------------|
| EPI_ISL_3771684,<br>EPI_ISL_4305875<br>EPI_ISL_4620243                                                                                                                                                                                                                                                                                                                                                                                                                                                                                                                                                                                                                                                                                                                                                                                                                                                                                                                                                                                                                                                                                                                                                                                                                                                                                                                                                                                                                                                                                                                                                                                                                                                                                                                                                                                                                                                                                                                                                                                                                                                                                                                                                                                                                                                                                                                                                                                                                                                                                                                                                                                                                                                                                                                                                                                                                                                                                                                                                                                                                                                                                                                                                                                                                                                                                                                                                                                                                                                                                                                                                                                                                                                                                                                                                                                                                                                                                                                                                                                                                                                                                                                                                                                                                                                                                                                                                                                                                                                                                                                                                                                                                                                                                                                                                                                                                                                                                                                                                                                                                                                                                                                                                                                                                                                                                                                                                                                                                                                                                                                                                                                                                                                                                                                                                                                                                                                                                                                                                                                                                                                                                                                                                                                                                                                                                                                                                                                                                                                                                                                                                                                                                                                                                                                                                                                                                                                                                                                                                                                                                                                                                                                                                                                                                                                                                                                                                                                                                                                                                                                                                                                                                                                                                                                                                                                                                                                                                                                                                                                                                                                                                                                                                                                                                                                                                                                                                                                                                                                                                                                                                                                                                                                                                                                                                                                                                                                                                                                                                                                                                                                                                                                                                                                                                                                                                                                                                                                                                                                                                                                                                                                                                                                                                                                                                                                                                                                                                                                                                                                                                                                                                                                                                                                                                                                                                                                                                                                                                                                                                                                                                                                                                                                              | Barts Health NHS Trust                                                                                                                                                                                                                                                               | COVID-19 Genomics UK (COG-UK) Consortium                                                                                                                                                                                                                                       | BROAD; Beatrix; CUTINO-MOGUEL; Claire; David; Dola; HARRINGTON; KELE; KULASEGARAN-SHYLINI; Maria-Teresa; OWOYEMI; Raghavendran                                                                                                                                                                                                                                                       |
| EPI_ISL_3169110, EPI_ISL_3284230, EPI_ISL_3314841, EPI_ISL_3363726, EPI_ISL_3379525, EPI_ISL_3435706, EPI_ISL_3435847, EPI_ISL_3435963, EPI_ISL_3436574, EPI_ISL_3436607, EPI_ISL_3436999, EPI_ISL_3437195, EPI_ISL_3437327, EPI_ISL_3437384, EPI_ISL_3438529, EPI_ISL_3441540, EPI_ISL_3441590, EPI_ISL_3441640, EPI_ISL_3441809, EPI_ISL_3441826, EPI_ISL_3441877, EPI_ISL_3442803, EPI_ISL_3442882, EPI_ISL_3442965, EPI_ISL_3467214, EPI_ISL_3467314, EPI_ISL_3467329, EPI_ISL_3467461, EPI_ISL_3528010, EPI_ISL_3528677, EPI_ISL_3529262, EPI_ISL_3560387, EPI_ISL_3560930, EPI_ISL_3561136, EPI_ISL_3561648, EPI_ISL_3562414, EPI_ISL_3562476, EPI_ISL_3562672, EPI_ISL_3563543, EPI_ISL_3642128, EPI_ISL_3620689, EPI_ISL_3729777, EPI_ISL_3765594, EPI_ISL_3767282, EPI_ISL_3952039, EPI_ISL_3954036, EPI_ISL_3964077, EPI_ISL_4013442, EPI_ISL_4068038, EPI_ISL_4088738, EPI_ISL_4088162, EPI_ISL_4088226, EPI_ISL_4217171, EPI_ISL_4247636, EPI_ISL_4248702, EPI_ISL_4288614, EPI_ISL_4288707, EPI_ISL_4288749, EPI_ISL_4288823, EPI_ISL_4290308, EPI_ISL_4320418, EPI_ISL_4323080, EPI_ISL_4324189, EPI_ISL_4326884, EPI_ISL_4326886, EPI_ISL_4327035, EPI_ISL_4327057, EPI_ISL_4349745, EPI_ISL_4350781, EPI_ISL_4350915, EPI_ISL_4350923, EPI_ISL_4351022, EPI_ISL_4351363, EPI_ISL_4352147, EPI_ISL_4402997, EPI_ISL_4451846, EPI_ISL_4453987, EPI_ISL_4477247, EPI_ISL_4477668, EPI_ISL_4500022, EPI_ISL_4500131, EPI_ISL_4500805, EPI_ISL_4502196, EPI_ISL_4502240, EPI_ISL_4502415, EPI_ISL_4502874, EPI_ISL_4521405, EPI_ISL_4524559, EPI_ISL_4524583, EPI_ISL_4524626, EPI_ISL_4524817, EPI_ISL_4525422, EPI_ISL_4526476, EPI_ISL_4526837, EPI_ISL_4527568, EPI_ISL_4527688, EPI_ISL_4584693, EPI_ISL_4586435, EPI_ISL_4586697, EPI_ISL_4589756, EPI_ISL_4591642, EPI_ISL_4591760, EPI_ISL_4592458, EPI_ISL_4592608, EPI_ISL_4592677, EPI_ISL_4592747, EPI_ISL_4592959                                                                                                                                                                                                                                                                                                                                                                                                                                                                                                                                                                                                                                                                                                                                                                                                                                                                                                                                                                                                                                                                                                                                                                                                                                                                                                                                                                                                                                                                                                                                                                                                                                                                                                                                                                                                                                                                                                                                                                                                                                                                                                                                                                                                                                                                                                                                                                                                                                                                                                                                                                                                                                                                                                                                                                                                                                                                                                                                                                                                                                                                                                                                                                                                                                                                                                                                                                                                                                                                                                                                                                                                                                                                                                                                                                                                                                                                                                                                                                                                                                                                                                                                                                                                                                                                                                                                                                                                                                                                                                                                                                                                                                                                                                                                                                                                                                                                                                                                                                                                                                                                                                                                                                                                                                                                                                                                                                                                                                                                                                                                                                                                                                                                                                                                                                                                                                                                                                                                                                                                                                                                                                                                                                                                                                                                                                                                                                                                                                                                                                                                                                                                                                                                                                                                                                                                                                                                                                                                                                                                                                                                                                                                                                                                                                                                                                                                                                                                                                                                                                                                                                                                                                                                                                                                                                                                                                                                                                                                                                                                                                                                                                                                                                                                                                                                                                                                                                                                                                                                                                                                                                                                                                                                                                                                                                                                                           | Robert Koch Institute                                                                                                                                                                                                                                                                |                                                                                                                                                                                                                                                                                |                                                                                                                                                                                                                                                                                                                                                                                      |
| see above                                                                                                                                                                                                                                                                                                                                                                                                                                                                                                                                                                                                                                                                                                                                                                                                                                                                                                                                                                                                                                                                                                                                                                                                                                                                                                                                                                                                                                                                                                                                                                                                                                                                                                                                                                                                                                                                                                                                                                                                                                                                                                                                                                                                                                                                                                                                                                                                                                                                                                                                                                                                                                                                                                                                                                                                                                                                                                                                                                                                                                                                                                                                                                                                                                                                                                                                                                                                                                                                                                                                                                                                                                                                                                                                                                                                                                                                                                                                                                                                                                                                                                                                                                                                                                                                                                                                                                                                                                                                                                                                                                                                                                                                                                                                                                                                                                                                                                                                                                                                                                                                                                                                                                                                                                                                                                                                                                                                                                                                                                                                                                                                                                                                                                                                                                                                                                                                                                                                                                                                                                                                                                                                                                                                                                                                                                                                                                                                                                                                                                                                                                                                                                                                                                                                                                                                                                                                                                                                                                                                                                                                                                                                                                                                                                                                                                                                                                                                                                                                                                                                                                                                                                                                                                                                                                                                                                                                                                                                                                                                                                                                                                                                                                                                                                                                                                                                                                                                                                                                                                                                                                                                                                                                                                                                                                                                                                                                                                                                                                                                                                                                                                                                                                                                                                                                                                                                                                                                                                                                                                                                                                                                                                                                                                                                                                                                                                                                                                                                                                                                                                                                                                                                                                                                                                                                                                                                                                                                                                                                                                                                                                                                                                                                                                           | Berkshire and Surrey Pathology Services Lighthouse Laboratory                                                                                                                                                                                                                        | Wellcome Sanger Institute for the COVID-19 Genomics UK (COG-UK) Consortium                                                                                                                                                                                                     | Berkshire and Surrey Pathology Services Lighthouse Laboratory and Alex Alderton; Cordelia Langford; David K. Jackson; Dominic Kwiatkowski; Ewan Harrison; Ian Johnston; Jeffrey Barrett; John Sillitoe on behalf of the Wellcome Sanger Institute COVID-19 Surveillance Team; Roberto Amato; Sonia Goncalves                                                                         |
| EPI_ISL_4609995<br>EPI_ISL_4064785<br>EPI_ISL_3357245                                                                                                                                                                                                                                                                                                                                                                                                                                                                                                                                                                                                                                                                                                                                                                                                                                                                                                                                                                                                                                                                                                                                                                                                                                                                                                                                                                                                                                                                                                                                                                                                                                                                                                                                                                                                                                                                                                                                                                                                                                                                                                                                                                                                                                                                                                                                                                                                                                                                                                                                                                                                                                                                                                                                                                                                                                                                                                                                                                                                                                                                                                                                                                                                                                                                                                                                                                                                                                                                                                                                                                                                                                                                                                                                                                                                                                                                                                                                                                                                                                                                                                                                                                                                                                                                                                                                                                                                                                                                                                                                                                                                                                                                                                                                                                                                                                                                                                                                                                                                                                                                                                                                                                                                                                                                                                                                                                                                                                                                                                                                                                                                                                                                                                                                                                                                                                                                                                                                                                                                                                                                                                                                                                                                                                                                                                                                                                                                                                                                                                                                                                                                                                                                                                                                                                                                                                                                                                                                                                                                                                                                                                                                                                                                                                                                                                                                                                                                                                                                                                                                                                                                                                                                                                                                                                                                                                                                                                                                                                                                                                                                                                                                                                                                                                                                                                                                                                                                                                                                                                                                                                                                                                                                                                                                                                                                                                                                                                                                                                                                                                                                                                                                                                                                                                                                                                                                                                                                                                                                                                                                                                                                                                                                                                                                                                                                                                                                                                                                                                                                                                                                                                                                                                                                                                                                                                                                                                                                                                                                                                                                                                                                                                                               | CENTOGENE Frankfurt Laboratory: Niederlassung Industriepark Höchst<br>Center for Laboratory Medicine<br>Department of Bacteria, Parasites and Fungi, Statens Serum Institut, Copenhagen, Denmark                                                                                     | Robert Koch Institute<br>Center for Laboratory Medicine<br>Statens Serum Institut<br>Bioinformatics and Microbial Genomics                                                                                                                                                     | Yannick Gerth<br>Danish Covid-19 Genome Consortium                                                                                                                                                                                                                                                                                                                                   |
| EPI_ISL_4558691<br>EPI_ISL_4228651<br>EPI_ISL_4442586<br>EPI_ISL_4660614<br>EPI_ISL_4660623                                                                                                                                                                                                                                                                                                                                                                                                                                                                                                                                                                                                                                                                                                                                                                                                                                                                                                                                                                                                                                                                                                                                                                                                                                                                                                                                                                                                                                                                                                                                                                                                                                                                                                                                                                                                                                                                                                                                                                                                                                                                                                                                                                                                                                                                                                                                                                                                                                                                                                                                                                                                                                                                                                                                                                                                                                                                                                                                                                                                                                                                                                                                                                                                                                                                                                                                                                                                                                                                                                                                                                                                                                                                                                                                                                                                                                                                                                                                                                                                                                                                                                                                                                                                                                                                                                                                                                                                                                                                                                                                                                                                                                                                                                                                                                                                                                                                                                                                                                                                                                                                                                                                                                                                                                                                                                                                                                                                                                                                                                                                                                                                                                                                                                                                                                                                                                                                                                                                                                                                                                                                                                                                                                                                                                                                                                                                                                                                                                                                                                                                                                                                                                                                                                                                                                                                                                                                                                                                                                                                                                                                                                                                                                                                                                                                                                                                                                                                                                                                                                                                                                                                                                                                                                                                                                                                                                                                                                                                                                                                                                                                                                                                                                                                                                                                                                                                                                                                                                                                                                                                                                                                                                                                                                                                                                                                                                                                                                                                                                                                                                                                                                                                                                                                                                                                                                                                                                                                                                                                                                                                                                                                                                                                                                                                                                                                                                                                                                                                                                                                                                                                                                                                                                                                                                                                                                                                                                                                                                                                                                                                                                                                                         | Diamisanto GmbH<br>Eurofins LifeCodexx GmbH<br>HOSPITAL DE BELLVITGE                                                                                                                                                                                                                 | Institute of Medical Virology<br>Robert Koch Institute<br>Microbiology Department                                                                                                                                                                                              | Alexandra Trkola; Annette Audigé; Cyril Shah; Gabriela Ziltener; Guido Bloembergen; Jon Huder; Jürg Böni; Kevin Steiner; Maria Grünberg; Maryam Zaheri; Michael Huber; Riccarda Capaul; Stefan Schmutz; Verena Kufner<br>Robert Koch Institute<br>Aida Gonzalez-Diaz; Carmen Ardanuy; Jordi Camara; Jordi Niubó; Laura Calatayud; M Angeles Dominguez; Sara Marti; Yolanda Hernandez |
| EPI_ISL_3309956, EPI_ISL_3311570, EPI_ISL_3366548, EPI_ISL_3437063, EPI_ISL_3441198, EPI_ISL_3442890, EPI_ISL_3455233, EPI_ISL_3455307, EPI_ISL_3469857, EPI_ISL_3499512, EPI_ISL_3506646, EPI_ISL_3580925, EPI_ISL_3581679, EPI_ISL_3641093, EPI_ISL_3641549, EPI_ISL_3641675, EPI_ISL_3642223, EPI_ISL_3702935, EPI_ISL_3703101, EPI_ISL_3764694, EPI_ISL_3767802, EPI_ISL_3884756, EPI_ISL_4522669, EPI_ISL_4522828, EPI_ISL_4522992, EPI_ISL_4523099, EPI_ISL_4523194, EPI_ISL_4585476, EPI_ISL_4585596, EPI_ISL_4587357, EPI_ISL_4587364, EPI_ISL_4587934, EPI_ISL_4588737, EPI_ISL_4589037, EPI_ISL_4589075, EPI_ISL_4596469, EPI_ISL_4597332, EPI_ISL_4597467, EPI_ISL_4597498, EPI_ISL_4620225, EPI_ISL_4621886, EPI_ISL_4622204, EPI_ISL_4670668, EPI_ISL_4673337, EPI_ISL_4673407, EPI_ISL_4673416, EPI_ISL_4674336, EPI_ISL_4678665, EPI_ISL_4679497, EPI_ISL_4733560, EPI_ISL_4733579, EPI_ISL_4733594, EPI_ISL_4735828, EPI_ISL_4736278                                                                                                                                                                                                                                                                                                                                                                                                                                                                                                                                                                                                                                                                                                                                                                                                                                                                                                                                                                                                                                                                                                                                                                                                                                                                                                                                                                                                                                                                                                                                                                                                                                                                                                                                                                                                                                                                                                                                                                                                                                                                                                                                                                                                                                                                                                                                                                                                                                                                                                                                                                                                                                                                                                                                                                                                                                                                                                                                                                                                                                                                                                                                                                                                                                                                                                                                                                                                                                                                                                                                                                                                                                                                                                                                                                                                                                                                                                                                                                                                                                                                                                                                                                                                                                                                                                                                                                                                                                                                                                                                                                                                                                                                                                                                                                                                                                                                                                                                                                                                                                                                                                                                                                                                                                                                                                                                                                                                                                                                                                                                                                                                                                                                                                                                                                                                                                                                                                                                                                                                                                                                                                                                                                                                                                                                                                                                                                                                                                                                                                                                                                                                                                                                                                                                                                                                                                                                                                                                                                                                                                                                                                                                                                                                                                                                                                                                                                                                                                                                                                                                                                                                                                                                                                                                                                                                                                                                                                                                                                                                                                                                                                                                                                                                                                                                                                                                                                                                                                                                                                                                                                                                                                                                                                                                                                                                                                                                                                                                                                                                                                                                                                                                                                                                                                                                                                                                                                                                                                                                                                                                                                                                                                                                                                                                                                | Wellcome Sanger Institute for the COVID-19 Genomics UK (COG-UK) Consortium                                                                                                                                                                                                           | Cordelia Langford; David K. Jackson; Dominic Kwiatkowski; Ewan Harrison; Health Services Laboratories and Alex Alderton; Ian Johnston; Jeffrey Barrett; John Sillitoe on behalf of the Wellcome Sanger Institute COVID-19 Surveillance Team; Roberto Amato; Sonia Goncalves    |                                                                                                                                                                                                                                                                                                                                                                                      |
| see above                                                                                                                                                                                                                                                                                                                                                                                                                                                                                                                                                                                                                                                                                                                                                                                                                                                                                                                                                                                                                                                                                                                                                                                                                                                                                                                                                                                                                                                                                                                                                                                                                                                                                                                                                                                                                                                                                                                                                                                                                                                                                                                                                                                                                                                                                                                                                                                                                                                                                                                                                                                                                                                                                                                                                                                                                                                                                                                                                                                                                                                                                                                                                                                                                                                                                                                                                                                                                                                                                                                                                                                                                                                                                                                                                                                                                                                                                                                                                                                                                                                                                                                                                                                                                                                                                                                                                                                                                                                                                                                                                                                                                                                                                                                                                                                                                                                                                                                                                                                                                                                                                                                                                                                                                                                                                                                                                                                                                                                                                                                                                                                                                                                                                                                                                                                                                                                                                                                                                                                                                                                                                                                                                                                                                                                                                                                                                                                                                                                                                                                                                                                                                                                                                                                                                                                                                                                                                                                                                                                                                                                                                                                                                                                                                                                                                                                                                                                                                                                                                                                                                                                                                                                                                                                                                                                                                                                                                                                                                                                                                                                                                                                                                                                                                                                                                                                                                                                                                                                                                                                                                                                                                                                                                                                                                                                                                                                                                                                                                                                                                                                                                                                                                                                                                                                                                                                                                                                                                                                                                                                                                                                                                                                                                                                                                                                                                                                                                                                                                                                                                                                                                                                                                                                                                                                                                                                                                                                                                                                                                                                                                                                                                                                                                                           | Health Services Laboratories                                                                                                                                                                                                                                                         | Wellcome Sanger Institute for the COVID-19 Genomics UK (COG-UK) Consortium                                                                                                                                                                                                     | Cordelia Langford; David K. Jackson; Dominic Kwiatkowski; Ewan Harrison; Ian Johnston; Jeffrey Barrett; John Sillitoe on behalf of the Wellcome Sanger Institute COVID-19 Surveillance Team; Roberto Amato; Sonia Goncalves                                                                                                                                                          |
| EPI_ISL_3969139, EPI_ISL_3969140, EPI_ISL_3969869, EPI_ISL_3970538, EPI_ISL_3975252, EPI_ISL_4015939, EPI_ISL_4101170, EPI_ISL_4101296, EPI_ISL_4144878, EPI_ISL_4192007, EPI_ISL_4192046, EPI_ISL_4192216, EPI_ISL_4192226, EPI_ISL_4290021, EPI_ISL_4290625, EPI_ISL_4290827, EPI_ISL_4327336, EPI_ISL_4329045, EPI_ISL_4353317, EPI_ISL_4499222, EPI_ISL_4522422, EPI_ISL_4522431, EPI_ISL_4522669, EPI_ISL_4522828, EPI_ISL_4522992, EPI_ISL_4523099, EPI_ISL_4523194, EPI_ISL_4585476, EPI_ISL_4585596, EPI_ISL_4587357, EPI_ISL_4587364, EPI_ISL_4587934, EPI_ISL_4588737, EPI_ISL_4589037, EPI_ISL_4589075, EPI_ISL_4596469, EPI_ISL_4597332, EPI_ISL_4597467, EPI_ISL_4597498, EPI_ISL_4620225, EPI_ISL_4621886, EPI_ISL_4622204, EPI_ISL_4670668, EPI_ISL_4673337, EPI_ISL_4673407, EPI_ISL_4673416, EPI_ISL_4674336, EPI_ISL_4678665, EPI_ISL_4679497, EPI_ISL_4733560, EPI_ISL_4733579, EPI_ISL_4733594, EPI_ISL_4735828, EPI_ISL_4736278                                                                                                                                                                                                                                                                                                                                                                                                                                                                                                                                                                                                                                                                                                                                                                                                                                                                                                                                                                                                                                                                                                                                                                                                                                                                                                                                                                                                                                                                                                                                                                                                                                                                                                                                                                                                                                                                                                                                                                                                                                                                                                                                                                                                                                                                                                                                                                                                                                                                                                                                                                                                                                                                                                                                                                                                                                                                                                                                                                                                                                                                                                                                                                                                                                                                                                                                                                                                                                                                                                                                                                                                                                                                                                                                                                                                                                                                                                                                                                                                                                                                                                                                                                                                                                                                                                                                                                                                                                                                                                                                                                                                                                                                                                                                                                                                                                                                                                                                                                                                                                                                                                                                                                                                                                                                                                                                                                                                                                                                                                                                                                                                                                                                                                                                                                                                                                                                                                                                                                                                                                                                                                                                                                                                                                                                                                                                                                                                                                                                                                                                                                                                                                                                                                                                                                                                                                                                                                                                                                                                                                                                                                                                                                                                                                                                                                                                                                                                                                                                                                                                                                                                                                                                                                                                                                                                                                                                                                                                                                                                                                                                                                                                                                                                                                                                                                                                                                                                                                                                                                                                                                                                                                                                                                                                                                                                                                                                                                                                                                                                                                                                                                                                                                                                                                                                                                                                                                                                                                                                                                                                                                                                                                                                                                                                                                | Wellcome Sanger Institute for the COVID-19 Genomics UK (COG-UK) Consortium                                                                                                                                                                                                           | Cordelia Langford; David K. Jackson; Dominic Kwiatkowski; Ewan Harrison; Ian Johnston; Integrated Covid Hub North East and Alex Alderton; Jeffrey Barrett; John Sillitoe on behalf of the Wellcome Sanger Institute COVID-19 Surveillance Team; Roberto Amato; Sonia Goncalves |                                                                                                                                                                                                                                                                                                                                                                                      |
| see above                                                                                                                                                                                                                                                                                                                                                                                                                                                                                                                                                                                                                                                                                                                                                                                                                                                                                                                                                                                                                                                                                                                                                                                                                                                                                                                                                                                                                                                                                                                                                                                                                                                                                                                                                                                                                                                                                                                                                                                                                                                                                                                                                                                                                                                                                                                                                                                                                                                                                                                                                                                                                                                                                                                                                                                                                                                                                                                                                                                                                                                                                                                                                                                                                                                                                                                                                                                                                                                                                                                                                                                                                                                                                                                                                                                                                                                                                                                                                                                                                                                                                                                                                                                                                                                                                                                                                                                                                                                                                                                                                                                                                                                                                                                                                                                                                                                                                                                                                                                                                                                                                                                                                                                                                                                                                                                                                                                                                                                                                                                                                                                                                                                                                                                                                                                                                                                                                                                                                                                                                                                                                                                                                                                                                                                                                                                                                                                                                                                                                                                                                                                                                                                                                                                                                                                                                                                                                                                                                                                                                                                                                                                                                                                                                                                                                                                                                                                                                                                                                                                                                                                                                                                                                                                                                                                                                                                                                                                                                                                                                                                                                                                                                                                                                                                                                                                                                                                                                                                                                                                                                                                                                                                                                                                                                                                                                                                                                                                                                                                                                                                                                                                                                                                                                                                                                                                                                                                                                                                                                                                                                                                                                                                                                                                                                                                                                                                                                                                                                                                                                                                                                                                                                                                                                                                                                                                                                                                                                                                                                                                                                                                                                                                                                                           | Integrated Covid Hub North East                                                                                                                                                                                                                                                      | Wellcome Sanger Institute for the COVID-19 Genomics UK (COG-UK) Consortium                                                                                                                                                                                                     | Cordelia Langford; David K. Jackson; Dominic Kwiatkowski; Ewan Harrison; Ian Johnston; Integrated Covid Hub North East and Alex Alderton; Jeffrey Barrett; John Sillitoe on behalf of the Wellcome Sanger Institute COVID-19 Surveillance Team; Roberto Amato; Sonia Goncalves                                                                                                       |
| EPI_ISL_4609124<br>EPI_ISL_4616900<br>EPI_ISL_4624706<br>EPI_ISL_4615379<br>EPI_ISL_4612196<br>EPI_ISL_3915579<br>EPI_ISL_3824128                                                                                                                                                                                                                                                                                                                                                                                                                                                                                                                                                                                                                                                                                                                                                                                                                                                                                                                                                                                                                                                                                                                                                                                                                                                                                                                                                                                                                                                                                                                                                                                                                                                                                                                                                                                                                                                                                                                                                                                                                                                                                                                                                                                                                                                                                                                                                                                                                                                                                                                                                                                                                                                                                                                                                                                                                                                                                                                                                                                                                                                                                                                                                                                                                                                                                                                                                                                                                                                                                                                                                                                                                                                                                                                                                                                                                                                                                                                                                                                                                                                                                                                                                                                                                                                                                                                                                                                                                                                                                                                                                                                                                                                                                                                                                                                                                                                                                                                                                                                                                                                                                                                                                                                                                                                                                                                                                                                                                                                                                                                                                                                                                                                                                                                                                                                                                                                                                                                                                                                                                                                                                                                                                                                                                                                                                                                                                                                                                                                                                                                                                                                                                                                                                                                                                                                                                                                                                                                                                                                                                                                                                                                                                                                                                                                                                                                                                                                                                                                                                                                                                                                                                                                                                                                                                                                                                                                                                                                                                                                                                                                                                                                                                                                                                                                                                                                                                                                                                                                                                                                                                                                                                                                                                                                                                                                                                                                                                                                                                                                                                                                                                                                                                                                                                                                                                                                                                                                                                                                                                                                                                                                                                                                                                                                                                                                                                                                                                                                                                                                                                                                                                                                                                                                                                                                                                                                                                                                                                                                                                                                                                                                   | LADR Zentrallabor DR. Kramer & Kollegen Geesthacht<br>LabKom - Labor Augsburg MVZ GmbH<br>Labor Becker & Kollegen (Standort München)<br>Labor Mönchengladbach MVZ Dr. Stein & Kollegen GBR<br>Laboratorium Badawczo-Rozwojowe Vitagenum<br>Laboratorium Badawczo-Rozwojowe Vitagenum | Robert Koch Institute<br>Robert Koch Institute<br>Robert Koch Institute<br>Robert Koch Institute<br>WSSE_Gorzow<br>Wojewódzka Stacja Sanitarno-Epidemiologiczna w Katowicach                                                                                                   | Robert Koch Institute<br>Robert Koch Institute<br>Robert Koch Institute<br>Elzbieta Justyńska; Klaudia Kobendza-Włodarczyk; Patrycja Faberska and Marek Magol; Renata Siegel<br>Beata Rozwadowska                                                                                                                                                                                    |
| EPI_ISL_3225463, EPI_ISL_3580742, EPI_ISL_3883580, EPI_ISL_3951111, EPI_ISL_3953611, EPI_ISL_3955588, EPI_ISL_3957006, EPI_ISL_3990763, EPI_ISL_3993590, EPI_ISL_3994202, EPI_ISL_3995491, EPI_ISL_3995944, EPI_ISL_3995946, EPI_ISL_3995906, EPI_ISL_4011439, EPI_ISL_4047935, EPI_ISL_4049038, EPI_ISL_4065962, EPI_ISL_4098362, EPI_ISL_4098472, EPI_ISL_4143842, EPI_ISL_4189599, EPI_ISL_4189629, EPI_ISL_4189902, EPI_ISL_4190637, EPI_ISL_4190990, EPI_ISL_4215522, EPI_ISL_4215745, EPI_ISL_4215814, EPI_ISL_4215971, EPI_ISL_4250617, EPI_ISL_4250987, EPI_ISL_4250994, EPI_ISL_4263575, EPI_ISL_4287267, EPI_ISL_4287416, EPI_ISL_4287619, EPI_ISL_4288447, EPI_ISL_4289725, EPI_ISL_4319530, EPI_ISL_4319868, EPI_ISL_4326055, EPI_ISL_4327334, EPI_ISL_4327836, EPI_ISL_4349256, EPI_ISL_4350348, EPI_ISL_4352276, EPI_ISL_4355315, EPI_ISL_4355449, EPI_ISL_4355453, EPI_ISL_4355457, EPI_ISL_4355461, EPI_ISL_4355465, EPI_ISL_4355469, EPI_ISL_4355473, EPI_ISL_4355477, EPI_ISL_4355481, EPI_ISL_4355485, EPI_ISL_4355489, EPI_ISL_4355493, EPI_ISL_4355497, EPI_ISL_4355501, EPI_ISL_4355505, EPI_ISL_4355509, EPI_ISL_4355513, EPI_ISL_4355517, EPI_ISL_4355521, EPI_ISL_4355525, EPI_ISL_4355529, EPI_ISL_4355533, EPI_ISL_4355537, EPI_ISL_4355541, EPI_ISL_4355545, EPI_ISL_4355549, EPI_ISL_4355553, EPI_ISL_4355557, EPI_ISL_4355561, EPI_ISL_4355565, EPI_ISL_4355569, EPI_ISL_4355573, EPI_ISL_4355577, EPI_ISL_4355581, EPI_ISL_4355585, EPI_ISL_4355589, EPI_ISL_4355593, EPI_ISL_4355597, EPI_ISL_4355601, EPI_ISL_4355605, EPI_ISL_4355609, EPI_ISL_4355613, EPI_ISL_4355617, EPI_ISL_4355621, EPI_ISL_4355625, EPI_ISL_4355629, EPI_ISL_4355633, EPI_ISL_4355637, EPI_ISL_4355641, EPI_ISL_4355645, EPI_ISL_4355649, EPI_ISL_4355653, EPI_ISL_4355657, EPI_ISL_4355661, EPI_ISL_4355665, EPI_ISL_4355669, EPI_ISL_4355673, EPI_ISL_4355677, EPI_ISL_4355681, EPI_ISL_4355685, EPI_ISL_4355689, EPI_ISL_4355693, EPI_ISL_4355697, EPI_ISL_4355701, EPI_ISL_4355705, EPI_ISL_4355709, EPI_ISL_4355713, EPI_ISL_4355717, EPI_ISL_4355721, EPI_ISL_4355725, EPI_ISL_4355729, EPI_ISL_4355733, EPI_ISL_4355737, EPI_ISL_4355741, EPI_ISL_4355745, EPI_ISL_4355749, EPI_ISL_4355753, EPI_ISL_4355757, EPI_ISL_4355761, EPI_ISL_4355765, EPI_ISL_4355769, EPI_ISL_4355773, EPI_ISL_4355777, EPI_ISL_4355781, EPI_ISL_4355785, EPI_ISL_4355789, EPI_ISL_4355793, EPI_ISL_4355797, EPI_ISL_4355801, EPI_ISL_4355805, EPI_ISL_4355809, EPI_ISL_4355813, EPI_ISL_4355817, EPI_ISL_4355821, EPI_ISL_4355825, EPI_ISL_4355829, EPI_ISL_4355833, EPI_ISL_4355837, EPI_ISL_4355841, EPI_ISL_4355845, EPI_ISL_4355849, EPI_ISL_4355853, EPI_ISL_4355857, EPI_ISL_4355861, EPI_ISL_4355865, EPI_ISL_4355869, EPI_ISL_4355873, EPI_ISL_4355877, EPI_ISL_4355881, EPI_ISL_4355885, EPI_ISL_4355889, EPI_ISL_4355893, EPI_ISL_4355897, EPI_ISL_4355901, EPI_ISL_4355905, EPI_ISL_4355909, EPI_ISL_4355913, EPI_ISL_4355917, EPI_ISL_4355921, EPI_ISL_4355925, EPI_ISL_4355929, EPI_ISL_4355933, EPI_ISL_4355937, EPI_ISL_4355941, EPI_ISL_4355945, EPI_ISL_4355949, EPI_ISL_4355953, EPI_ISL_4355957, EPI_ISL_4355961, EPI_ISL_4355965, EPI_ISL_4355969, EPI_ISL_4355973, EPI_ISL_4355977, EPI_ISL_4355981, EPI_ISL_4355985, EPI_ISL_4355989, EPI_ISL_4355993, EPI_ISL_4355997, EPI_ISL_4360001, EPI_ISL_4360005, EPI_ISL_4360009, EPI_ISL_4360013, EPI_ISL_4360017, EPI_ISL_4360021, EPI_ISL_4360025, EPI_ISL_4360029, EPI_ISL_4360033, EPI_ISL_4360037, EPI_ISL_4360041, EPI_ISL_4360045, EPI_ISL_4360049, EPI_ISL_4360053, EPI_ISL_4360057, EPI_ISL_4360061, EPI_ISL_4360065, EPI_ISL_4360069, EPI_ISL_4360073, EPI_ISL_4360077, EPI_ISL_4360081, EPI_ISL_4360085, EPI_ISL_4360089, EPI_ISL_4360093, EPI_ISL_4360097, EPI_ISL_4360101, EPI_ISL_4360105, EPI_ISL_4360109, EPI_ISL_4360113, EPI_ISL_4360117, EPI_ISL_4360121, EPI_ISL_4360125, EPI_ISL_4360129, EPI_ISL_4360133, EPI_ISL_4360137, EPI_ISL_4360141, EPI_ISL_4360145, EPI_ISL_4360149, EPI_ISL_4360153, EPI_ISL_4360157, EPI_ISL_4360161, EPI_ISL_4360165, EPI_ISL_4360169, EPI_ISL_4360173, EPI_ISL_4360177, EPI_ISL_4360181, EPI_ISL_4360185, EPI_ISL_4360189, EPI_ISL_4360193, EPI_ISL_4360197, EPI_ISL_4360201, EPI_ISL_4360205, EPI_ISL_4360209, EPI_ISL_4360213, EPI_ISL_4360217, EPI_ISL_4360221, EPI_ISL_4360225, EPI_ISL_4360229, EPI_ISL_4360233, EPI_ISL_4360237, EPI_ISL_4360241, EPI_ISL_4360245, EPI_ISL_4360249, EPI_ISL_4360253, EPI_ISL_4360257, EPI_ISL_4360261, EPI_ISL_4360265, EPI_ISL_4360269, EPI_ISL_4360273, EPI_ISL_4360277, EPI_ISL_4360281, EPI_ISL_4360285, EPI_ISL_4360289, EPI_ISL_4360293, EPI_ISL_4360297, EPI_ISL_4360301, EPI_ISL_4360305, EPI_ISL_4360309, EPI_ISL_4360313, EPI_ISL_4360317, EPI_ISL_4360321, EPI_ISL_4360325, EPI_ISL_4360329, EPI_ISL_4360333, EPI_ISL_4360337, EPI_ISL_4360341, EPI_ISL_4360345, EPI_ISL_4360349, EPI_ISL_4360353, EPI_ISL_4360357, EPI_ISL_4360361, EPI_ISL_4360365, EPI_ISL_4360369, EPI_ISL_4360373, EPI_ISL_4360377, EPI_ISL_4360381, EPI_ISL_4360385, EPI_ISL_4360389, EPI_ISL_4360393, EPI_ISL_4360397, EPI_ISL_4360401, EPI_ISL_4360405, EPI_ISL_4360409, EPI_ISL_4360413, EPI_ISL_4360417, EPI_ISL_4360421, EPI_ISL_4360425, EPI_ISL_4360429, EPI_ISL_4360433, EPI_ISL_4360437, EPI_ISL_4360441, EPI_ISL_4360445, EPI_ISL_4360449, EPI_ISL_4360453, EPI_ISL_4360457, EPI_ISL_4360461, EPI_ISL_4360465, EPI_ISL_4360469, EPI_ISL_4360473, EPI_ISL_4360477, EPI_ISL_4360481, EPI_ISL_4360485, EPI_ISL_4360489, EPI_ISL_4360493, EPI_ISL_4360497, EPI_ISL_4360501, EPI_ISL_4360505, EPI_ISL_4360509, EPI_ISL_4360513, EPI_ISL_4360517, EPI_ISL_4360521, EPI_ISL_4360525, EPI_ISL_4360529, EPI_ISL_4360533, EPI_ISL_4360537, EPI_ISL_4360541, EPI_ISL_4360545, EPI_ISL_4360549, EPI_ISL_4360553, EPI_ISL_4360557, EPI_ISL_4360561, EPI_ISL_4360565, EPI_ISL_4360569, EPI_ISL_4360573, EPI_ISL_4360577, EPI_ISL_4360581, EPI_ISL_4360585, EPI_ISL_4360589, EPI_ISL_4360593, EPI_ISL_4360597, EPI_ISL_4360601, EPI_ISL_4360605, EPI_ISL_4360609, EPI_ISL_4360613, EPI_ISL_4360617, EPI_ISL_4360621, EPI_ISL_4360625, EPI_ISL_4360629, EPI_ISL_4360633, EPI_ISL_4360637, EPI_ISL_4360641, EPI_ISL_4360645, EPI_ISL_4360649, EPI_ISL_4360653, EPI_ISL_4360657, EPI_ISL_4360661, EPI_ISL_4360665, EPI_ISL_4360669, EPI_ISL_4360673, EPI_ISL_4360677, EPI_ISL_4360681, EPI_ISL_4360685, EPI_ISL_4360689, EPI_ISL_4360693, EPI_ISL_4360697, EPI_ISL_4360701, EPI_ISL_4360705, EPI_ISL_4360709, EPI_ISL_4360713, EPI_ISL_4360717, EPI_ISL_4360721, EPI_ISL_4360725, EPI_ISL_4360729, EPI_ISL_4360733, EPI_ISL_4360737, EPI_ISL_4360741, EPI_ISL_4360745, EPI_ISL_4360749, EPI_ISL_4360753, EPI_ISL_4360757, EPI_ISL_4360761, EPI_ISL_4360765, EPI_ISL_4360769, EPI_ISL_4360773, EPI_ISL_4360777, EPI_ISL_4360781, EPI_ISL_4360785, EPI_ISL_4360789, EPI_ISL_4360793, EPI_ISL_4360797, EPI_ISL_4360801, EPI_ISL_4360805, EPI_ISL_4360809, EPI_ISL_4360813, EPI_ISL_4360817, EPI_ISL_4360821, EPI_ISL_4360825, EPI_ISL_4360829, EPI_ISL_4360833, EPI_ISL_4360837, EPI_ISL_4360841, EPI_ISL_4360845, EPI_ISL_4360849, EPI_ISL_4360853, EPI_ISL_4360857, EPI_ISL_4360861, EPI_ISL_4360865, EPI_ISL_4360869, EPI_ISL_4360873, EPI_ISL_4360877, EPI_ISL_4360881, EPI_ISL_4360885, EPI_ISL_4360889, EPI_ISL_4360893, EPI_ISL_4360897, EPI_ISL_4360901, EPI_ISL_4360905, EPI_ISL_4360909, EPI_ISL_4360913, EPI_ISL_4360917, EPI_ISL_4360921, EPI_ISL_4360925, EPI_ISL_4360929, EPI_ISL_4360933, EPI_ISL_4360937, EPI_ISL_4360941, EPI_ISL_4360945, EPI_ISL_4360949, EPI_ISL_4360953, EPI_ISL_4360957, EPI_ISL_4360961, EPI_ISL_4360965, EPI_ISL_4360969, EPI_ISL_4360973, EPI_ISL_4360977, EPI_ISL_4360981, EPI_ISL_4360985, EPI_ISL_4360989, EPI_ISL_4360993, EPI_ISL_4360997, EPI_ISL_4370001, EPI_ISL_4370005, EPI_ISL_4370009, EPI_ISL_4370013, EPI_ISL_4370017, EPI_ISL_4370021, EPI_ISL_4370025, EPI_ISL_4370029, EPI_ISL_4370033, EPI_ISL_4370037, EPI_ISL_4370041, EPI_ISL_4370045, EPI_ISL_4370049, EPI_ISL_4370053, EPI_ISL_4370057, EPI_ISL_4370061, EPI_ISL_4370065, EPI_ISL_4370069, EPI_ISL_4370073, EPI_ISL_4370077, EPI_ISL_4370081, EPI_ISL_4370085, EPI_ISL_4370089, EPI_ISL_4370093, EPI_ISL_4370097, EPI_ISL_4370101, EPI_ISL_4370105, EPI_ISL_4370109, EPI_ISL_4370113, EPI_ISL_4370117, EPI_ISL_4370121, EPI_ISL_4370125, EPI_ISL_4370129, EPI_ISL_4370133, EPI_ISL_4370137, EPI_ISL_4370141, EPI_ISL_4370145, EPI_ISL_4370149, EPI_ISL_4370153, EPI_ISL_4370157, EPI_ISL_4370161, EPI_ISL_4370165, EPI_ISL_4370169, EPI_ISL_4370173, EPI_ISL_4370177, EPI_ISL_4370181, EPI_ISL_4370185, EPI_ISL_4370189, EPI_ISL_4370193, EPI_ISL_4370197, EPI_ISL_4370201, EPI_ISL_4370205, EPI_ISL_4370209, EPI_ISL_4370213, EPI_ISL_4370217, EPI_ISL_4370221, EPI_ISL_4370225, EPI_ISL_4370229, EPI_ISL_4370233, EPI_ISL_4370237, EPI_ISL_4370241, EPI_ISL_4370245, EPI_ISL_4370249, EPI_ISL_4370253, EPI_ISL_4370257, EPI_ISL_4370261, EPI_ISL_4370265, EPI_ISL_4370269, EPI_ISL_4370273, EPI_ISL_4370277, EPI_ISL_4370281, EPI_ISL_4370285, EPI_ISL_4370289, EPI_ISL_4370293, EPI_ISL_4370297, EPI_ISL_4370301, EPI_ISL_4370305, EPI_ISL_4370309, EPI_ISL_4370313, EPI_ISL_4370317, EPI_ISL_4370321, EPI_ISL_4370325, EPI_ISL_4370329, EPI_ISL_4370333, EPI_ISL_4370337, EPI_ISL_4370341, EPI_ISL_4370345, EPI_ISL_4370349, EPI_ISL_4370353, EPI_ISL_4370357, EPI_ISL_4370361, EPI_ISL_4370365, EPI_ISL_4370369, EPI_ISL_4370373, EPI_ISL_4370377, EPI_ISL_4370381, EPI_ISL_4370385, EPI_ISL_4370389, EPI_ISL_4370393, EPI_ISL_4370397, EPI_ISL_4370401, EPI_ISL_4370405, EPI_ISL_4370409, EPI_ISL_4370413, EPI_ISL_4370417, EPI_ISL_4370421, EPI_ISL_4370425, EPI_ISL_4370429, EPI_ISL_4370433, EPI_ISL_4370437, EPI_ISL_4370441, EPI_ISL_4370445, EPI_ISL_4370449, EPI_ISL_4370453, EPI_ISL_4370457, EPI_ISL_4370461, EPI_ISL_4370465, EPI_ISL_4370469, EPI_ISL_4370473, EPI_ISL_4370477, EPI_ISL_4370481, EPI_ISL_4370485, EPI_ISL_4370489, EPI_ISL_4370493, EPI_ISL_4370497, EPI_ISL_4370501, EPI_ISL_4370505, EPI_ISL_4370509, EPI_ISL_4370513, EPI_ISL_4370517, EPI_ISL_4370521, EPI_ISL_4370525, EPI_ISL_4370529, EPI_ISL_4370533, EPI_ISL_4370537, EPI_ISL_4370541, EPI_ISL_4370545, EPI_ISL_4370549, EPI_ISL_4370553, EPI_ISL_4370557, EPI_ISL_4370561, EPI_ISL_4370565, EPI_ISL_4370569, EPI_ISL_4370573, EPI_ISL_4370577, EPI_ISL_4370581, EPI_ISL_4370585, EPI_ISL_4370589, EPI_ISL_4370593, EPI_ISL_4370597, EPI_ISL_4370601, EPI_ISL_4370605, EPI_ISL_4370609, EPI_ISL_4370613, EPI_ISL_4370617, EPI_ISL_4370621, EPI_ISL_4370625, EPI_ISL_4370629, EPI_ISL_4370633, EPI_ISL_4370637, EPI_ISL_4370641, EPI_ISL_4370645, EPI_ISL_4370649, EPI_ISL_4370653, EPI_ISL_4370657, EPI_ISL_4370661, EPI_ISL_4370665, EPI_ISL_4370669, EPI_ISL_4370673, EPI_IS |                                                                                                                                                                                                                                                                                      |                                                                                                                                                                                                                                                                                |                                                                                                                                                                                                                                                                                                                                                                                      |

| EPI_ISL_4731435                                                                                                                                                                                                                                                                                                                                                                                                                                                                                                                                                                                                                                                                                                                                                                                                                                                                                                                                                                                                          | National Center of Infectious and Parasitic Diseases                                                                                                                                                                | National Center of Infectious and Parasitic Diseases                       | Alexiev et al                                                                                                                                                                                                                                                                                                                                                                                                                                                                                                                                                                                             |
|--------------------------------------------------------------------------------------------------------------------------------------------------------------------------------------------------------------------------------------------------------------------------------------------------------------------------------------------------------------------------------------------------------------------------------------------------------------------------------------------------------------------------------------------------------------------------------------------------------------------------------------------------------------------------------------------------------------------------------------------------------------------------------------------------------------------------------------------------------------------------------------------------------------------------------------------------------------------------------------------------------------------------|---------------------------------------------------------------------------------------------------------------------------------------------------------------------------------------------------------------------|----------------------------------------------------------------------------|-----------------------------------------------------------------------------------------------------------------------------------------------------------------------------------------------------------------------------------------------------------------------------------------------------------------------------------------------------------------------------------------------------------------------------------------------------------------------------------------------------------------------------------------------------------------------------------------------------------|
| EPI_ISL_3421451, EPI_ISL_3571246, EPI_ISL_4114147, EPI_ISL_4115217, EPI_ISL_4115307, EPI_ISL_4306504, EPI_ISL_4306733                                                                                                                                                                                                                                                                                                                                                                                                                                                                                                                                                                                                                                                                                                                                                                                                                                                                                                    |                                                                                                                                                                                                                     |                                                                            |                                                                                                                                                                                                                                                                                                                                                                                                                                                                                                                                                                                                           |
| see above                                                                                                                                                                                                                                                                                                                                                                                                                                                                                                                                                                                                                                                                                                                                                                                                                                                                                                                                                                                                                | Northumbria University / South Tees Hospitals NHS Foundation Trust / North Cumbria Integrated Care NHS Foundation Trust / North Tees and Hartlepool NHS Foundation Trust / Newcastle Hospitals NHS Foundation Trust | COVID-19 Genomics UK (COG-UK) Consortium                                   | Andrew Nelson; Brendan Payne; Clive Graham; Darren L Smith; Debra Padgett; Edward Barton; Emma Swindells; Garren Scott; Gary Black; Gary Eltringham; Giles S Holt; Greg R Young; Jane Greenaway; Jennifer Collins; John Allan; Joshua Loh; Lynn Dover; Matthew Bashton; Mohammad A Tariq; Paul Baker; Sarah Essex; Steve Liggett; Wen C Yew; Yusrî Taha                                                                                                                                                                                                                                                   |
| EPI_ISL_3422885, EPI_ISL_3423017, EPI_ISL_3423345, EPI_ISL_3423921, EPI_ISL_3575552, EPI_ISL_3575553, EPI_ISL_3575770, EPI_ISL_3576064, EPI_ISL_3576184, EPI_ISL_3576189, EPI_ISL_3788684, EPI_ISL_3788931, EPI_ISL_3791264, EPI_ISL_3791268, EPI_ISL_3962928, EPI_ISL_3963281, EPI_ISL_3964575, EPI_ISL_3964592, EPI_ISL_3964593, EPI_ISL_3965442, EPI_ISL_4133414, EPI_ISL_4133892, EPI_ISL_4134000, EPI_ISL_4134004, EPI_ISL_4134065, EPI_ISL_4134247, EPI_ISL_4134370, EPI_ISL_4134969, EPI_ISL_4135820, EPI_ISL_4135923, EPI_ISL_4135951, EPI_ISL_4135975, EPI_ISL_4135976, EPI_ISL_4136207, EPI_ISL_4136691, EPI_ISL_4137069, EPI_ISL_4313309, EPI_ISL_4314149, EPI_ISL_4315129, EPI_ISL_4315131, EPI_ISL_4315140, EPI_ISL_4315185, EPI_ISL_4315428, EPI_ISL_4316825, EPI_ISL_4317441, EPI_ISL_4318293, EPI_ISL_4318298, EPI_ISL_4318307, EPI_ISL_4318338, EPI_ISL_4319188, EPI_ISL_4319351, EPI_ISL_4319625, EPI_ISL_4532280, EPI_ISL_4532306, EPI_ISL_4532713, EPI_ISL_4532976, EPI_ISL_4532982, EPI_ISL_4533028 |                                                                                                                                                                                                                     |                                                                            |                                                                                                                                                                                                                                                                                                                                                                                                                                                                                                                                                                                                           |
| see above                                                                                                                                                                                                                                                                                                                                                                                                                                                                                                                                                                                                                                                                                                                                                                                                                                                                                                                                                                                                                | Originating lab: Wales Specialist Virology Centre Sequencing lab: Pathogen Genomics Unit                                                                                                                            | Public Health Wales Microbiology Cardiff Wales Specialist Virology Centre  | Alec Birchley; Alexander Adams; Amy Gaskin; Angela Marchbank; Bree Gatica-Wilcox; Catherine Moore; Jason Coombes; Joanne Watkins; Joel Southgate; Johnathan Evans; Laura Gifford; Lauren Gilbert; Lee Graham; Malorie Perry; Matthew Bull; Nicole Pacchiarini; Sally Corden; Sara Kumziene-Summerhayes; Sara Rey; Sarah Taylor; Simon Cottrell; Sophie Jones; Tom Connor                                                                                                                                                                                                                                  |
| EPI_ISL_3773256, EPI_ISL_4307497, EPI_ISL_4529224, EPI_ISL_4529256, EPI_ISL_4529413, EPI_ISL_4529521, EPI_ISL_4529545                                                                                                                                                                                                                                                                                                                                                                                                                                                                                                                                                                                                                                                                                                                                                                                                                                                                                                    |                                                                                                                                                                                                                     |                                                                            |                                                                                                                                                                                                                                                                                                                                                                                                                                                                                                                                                                                                           |
| see above                                                                                                                                                                                                                                                                                                                                                                                                                                                                                                                                                                                                                                                                                                                                                                                                                                                                                                                                                                                                                | Quadram Institute Bioscience                                                                                                                                                                                        | COVID-19 Genomics UK (COG-UK) Consortium                                   | Alexander J Trotter; Alison E. Mather; Alp Aydin; Ana P. Tedim; Anastasia Kolyva; Andrew Bell; Andrew J. Page; Christopher Jeanes; Claire Stuart; Dave J. Baker; Ebenezer Foster-Nyarko; Gemma L. Kay; John Wain; Justin O'Grady; Leonardo de Oliveira Martins; Lewis G. Spurgin; Lindsay Coupland; Lizzie Meadows; Luke Bedford; Maria Diaz; Mark Webber; Martin Lott; Muhammed Yasir; Nabil-Fareed Alikhan; Ngozi Elumogo; Nicholas M. Thomson; Rachael Stanley; Rachel Gilroy; Reenesh Prakash; Rose K Davidson; Samir Dervisevic; Samuel Bloomfield; Sophie J. Prosolek; Steven Rudder; Thanh Le-Viet |
| EPI_ISL_3573145, EPI_ISL_3774470, EPI_ISL_3774715, EPI_ISL_3775677, EPI_ISL_3781427, EPI_ISL_3960523, EPI_ISL_3960645, EPI_ISL_3960722, EPI_ISL_3960736, EPI_ISL_3961952, EPI_ISL_3962002, EPI_ISL_3962504, EPI_ISL_4116905, EPI_ISL_4122892, EPI_ISL_4123613, EPI_ISL_4123680, EPI_ISL_4123774, EPI_ISL_4127888, EPI_ISL_4130339, EPI_ISL_4130471, EPI_ISL_4130480, EPI_ISL_4131134, EPI_ISL_4309330, EPI_ISL_4309547, EPI_ISL_4309960, EPI_ISL_4309968, EPI_ISL_4310982, EPI_ISL_4311237, EPI_ISL_4311297, EPI_ISL_4312137, EPI_ISL_4312386, EPI_ISL_4530233, EPI_ISL_4530340, EPI_ISL_4530516, EPI_ISL_4530873, EPI_ISL_4531731, EPI_ISL_4531832, EPI_ISL_4532003, EPI_ISL_4532069                                                                                                                                                                                                                                                                                                                                    |                                                                                                                                                                                                                     |                                                                            |                                                                                                                                                                                                                                                                                                                                                                                                                                                                                                                                                                                                           |
| see above                                                                                                                                                                                                                                                                                                                                                                                                                                                                                                                                                                                                                                                                                                                                                                                                                                                                                                                                                                                                                | Respiratory Virus Unit, Microbiology Services Colindale, Public Health England                                                                                                                                      | COVID-19 Genomics UK (COG-UK) Consortium                                   | PHE Covid Sequencing Team                                                                                                                                                                                                                                                                                                                                                                                                                                                                                                                                                                                 |
| EPI_ISL_4674490, EPI_ISL_4675144, EPI_ISL_4675601                                                                                                                                                                                                                                                                                                                                                                                                                                                                                                                                                                                                                                                                                                                                                                                                                                                                                                                                                                        | Rosalind Franklin Laboratory                                                                                                                                                                                        | Wellcome Sanger Institute for the COVID-19 Genomics UK (COG-UK) Consortium | Cordelia Langford; David K. Jackson; Dominic Kwiatkowski; Donald Fraser; Ewan Harrison; Ian Johnston; Jeffrey Barrett; John Sillitoe on behalf of the Wellcome Sanger Institute COVID-19 Surveillance Team; Rob Howes; Roberto Amato; Sonia Goncalves; Suki Lee; The Rosalind Franklin Laboratory and Alex Alderton                                                                                                                                                                                                                                                                                       |
| EPI_ISL_4037229, EPI_ISL_4492583                                                                                                                                                                                                                                                                                                                                                                                                                                                                                                                                                                                                                                                                                                                                                                                                                                                                                                                                                                                         | SYNLAB                                                                                                                                                                                                              | GIGA Medical Genomics                                                      | Bouchra Boujemla; Claire Gourzonès; Cécile Meex; Keith Durkin; Laurent Gillet; Maria Artesi; Marie-Pierre Hayette; Nadine Cambisano; Nathalie Renotte; Olivier Ek; Sébastien Bontems; Vincent Bours                                                                                                                                                                                                                                                                                                                                                                                                       |
| EPI_ISL_4446215, EPI_ISL_4613592, EPI_ISL_4617156, EPI_ISL_4617159                                                                                                                                                                                                                                                                                                                                                                                                                                                                                                                                                                                                                                                                                                                                                                                                                                                                                                                                                       | SYNLAB MVZ Leinfelden-Echterdingen                                                                                                                                                                                  | Robert Koch Institute                                                      |                                                                                                                                                                                                                                                                                                                                                                                                                                                                                                                                                                                                           |
| EPI_ISL_4607176                                                                                                                                                                                                                                                                                                                                                                                                                                                                                                                                                                                                                                                                                                                                                                                                                                                                                                                                                                                                          | SYNLAB MVZ Trier                                                                                                                                                                                                    | Robert Koch Institute                                                      |                                                                                                                                                                                                                                                                                                                                                                                                                                                                                                                                                                                                           |
| EPI_ISL_4222723, EPI_ISL_4226441, EPI_ISL_4226449, EPI_ISL_4230205, EPI_ISL_4438848, EPI_ISL_4446062, EPI_ISL_4608670, EPI_ISL_4610512, EPI_ISL_4610527, EPI_ISL_4610598, EPI_ISL_4615589                                                                                                                                                                                                                                                                                                                                                                                                                                                                                                                                                                                                                                                                                                                                                                                                                                |                                                                                                                                                                                                                     |                                                                            |                                                                                                                                                                                                                                                                                                                                                                                                                                                                                                                                                                                                           |
| see above                                                                                                                                                                                                                                                                                                                                                                                                                                                                                                                                                                                                                                                                                                                                                                                                                                                                                                                                                                                                                | SYNLAB MVZ Weiden                                                                                                                                                                                                   | Robert Koch Institute                                                      |                                                                                                                                                                                                                                                                                                                                                                                                                                                                                                                                                                                                           |
| EPI_ISL_4624148                                                                                                                                                                                                                                                                                                                                                                                                                                                                                                                                                                                                                                                                                                                                                                                                                                                                                                                                                                                                          | Sonic - Labor Staber Heilbronn                                                                                                                                                                                      | Robert Koch Institute                                                      |                                                                                                                                                                                                                                                                                                                                                                                                                                                                                                                                                                                                           |
| EPI_ISL_4446445                                                                                                                                                                                                                                                                                                                                                                                                                                                                                                                                                                                                                                                                                                                                                                                                                                                                                                                                                                                                          | Synlab MVZ Augsburg                                                                                                                                                                                                 | Robert Koch Institute                                                      |                                                                                                                                                                                                                                                                                                                                                                                                                                                                                                                                                                                                           |
| EPI_ISL_3420566, EPI_ISL_4528231, EPI_ISL_4528325, EPI_ISL_4528332                                                                                                                                                                                                                                                                                                                                                                                                                                                                                                                                                                                                                                                                                                                                                                                                                                                                                                                                                       | University College London, Great Ormond Street Hospital for Children NHS Foundation Trust, Imperial College Healthcare NHS Trust                                                                                    | COVID-19 Genomics UK (COG-UK) Consortium                                   | Charlotte Williams; Helena Tutill; Judith Breuer; Marius Cotic; Mark Kristiansen; Nadua Bayzid; Patricia Dyal; Rachel Williams; Sergi Castellano; Sunando Roy                                                                                                                                                                                                                                                                                                                                                                                                                                             |
| EPI_ISL_3424893, EPI_ISL_3424895, EPI_ISL_3424933                                                                                                                                                                                                                                                                                                                                                                                                                                                                                                                                                                                                                                                                                                                                                                                                                                                                                                                                                                        | Wales Specialist Virology Centre Sequencing lab: Pathogen Genomics Unit                                                                                                                                             | Public Health Wales Microbiology Cardiff Wales Specialist Virology Centre  | Alec Birchley; Alexander Adams; Amy Gaskin; Angela Marchbank; Bree Gatica-Wilcox; Catherine Moore; Jason Coombes; Joanne Watkins; Joel Southgate; Johnathan Evans; Laura Gifford; Lauren Gilbert; Lee Graham; Malorie Perry; Matthew Bull; Nicole Pacchiarini; Sally Corden; Sara Kumziene-Summerhayes; Sara Rey; Sarah Taylor; Simon Cottrell; Sophie Jones; Tom Connor                                                                                                                                                                                                                                  |
| EPI_ISL_3983406                                                                                                                                                                                                                                                                                                                                                                                                                                                                                                                                                                                                                                                                                                                                                                                                                                                                                                                                                                                                          | Zakład Diagnostyki Laboratoryjnej                                                                                                                                                                                   | Wojewodzka Stacja Sanitarno-Epidemiologiczna w Gorzowie Wielkopolskim      | Elzbieta Justynska; Klaudia Kobendza-Wodarczak; Patrycja Faberska and Marek Magol; Renata Siegel                                                                                                                                                                                                                                                                                                                                                                                                                                                                                                          |
| EPI_ISL_4587499                                                                                                                                                                                                                                                                                                                                                                                                                                                                                                                                                                                                                                                                                                                                                                                                                                                                                                                                                                                                          | labor team w AG                                                                                                                                                                                                     | Department of Biosystems Science and Engineering, ETH Zürich               | Andrea Patrignani; Andreas Lindauer; Andreia Cabral de Gouveia; Catharine Aquino; Chaoran Chen; Daniel Ehrsam; Doris Popovic; Griffin White; Isabel Stürmer; Ivan Topolsky; Jay Tracy; Kim Philipp Jablonski; Lara Fuhrmann; Laura Neff; Lennart Opitz; Louis du Plessis; Maria Domenica Moccia; Monika Bucher; Niko Beerenwinkel; Ralph Schlapbach; Rebekka Pohl; Sarah Nadaeu; Simon Grüter; Tanja Stadler; Timothy Sykes                                                                                                                                                                               |
