# Supplementary material for: SARS-COV-2 δ variant drives the pandemic in India and Europe via two subvariants
Source: bioRxiv or medRxiv preprint supplement (doi:10.1101/2021.10.16.21265096), 2021-10-20
Supplement: Supplementary file [file media-16.pdf]

We gratefully acknowledge the following Authors from the Originating laboratories responsible for obtaining the specimens, as well as the Submitting laboratories where the genome data were generated and shared via GISAID, on which this research is based.

All Submitters of data may be contacted directly via [www.gisaid.org](http://www.gisaid.org)

Authors are sorted alphabetically.

| Accession ID                                                                                                                                                                                                                                                                                                                                                                                                                                                                                                                                                                                                                                                                                                                                                                                                                                                                                                                                                                                                                                                                                                                                                                                                                                                                                                                                                                                                                                                                                                                                                                                                                                                                                                                                                                                                                                                                                                                                                                                                                                                                                                                                                                                                                                                                                                                                                                                                                                                                                                                                                                                                                                                                                                                                                                                                                                                                                                                                                                                                                                                                                                                                                                                                                                                                                                                                                                                                                                                                                                                                                                                                                                                                                                                                                                                                                                                                                                                                                                                                                                                                                                                                                                                                                                                                                                                                                                                                                                                                                                                                                                                                                                                                                                                                                                                                                                                                                                                                                                                                                                                                                                                                                                                                                                                                                                                                                                                                                                                                                                                                                                                                                                                                                                                                                                                                                                                                                                                                                                                                                                                                                                                                                                                                                                                                                                                                                                                                                                                                                                                                                                                                                                                                                                                                                                                                                                                                                                                                                                                                                                                                                                                                                                                                                                                                                                                                                                                                                                                                                                                                                                                                                                                                                                                                                                                                                                                                                                                                                                                                                                                                                                                                                                                                                                                                                                                                                                                                                                                                                                                                                                                                                                                                                                                                                                                                                                                                                                                                             | Originating Laboratory                                                                                                                                                                                                                                                                   | Submitting Laboratory                                                                                                                                                                        | Authors                                                                                                     |
|----------------------------------------------------------------------------------------------------------------------------------------------------------------------------------------------------------------------------------------------------------------------------------------------------------------------------------------------------------------------------------------------------------------------------------------------------------------------------------------------------------------------------------------------------------------------------------------------------------------------------------------------------------------------------------------------------------------------------------------------------------------------------------------------------------------------------------------------------------------------------------------------------------------------------------------------------------------------------------------------------------------------------------------------------------------------------------------------------------------------------------------------------------------------------------------------------------------------------------------------------------------------------------------------------------------------------------------------------------------------------------------------------------------------------------------------------------------------------------------------------------------------------------------------------------------------------------------------------------------------------------------------------------------------------------------------------------------------------------------------------------------------------------------------------------------------------------------------------------------------------------------------------------------------------------------------------------------------------------------------------------------------------------------------------------------------------------------------------------------------------------------------------------------------------------------------------------------------------------------------------------------------------------------------------------------------------------------------------------------------------------------------------------------------------------------------------------------------------------------------------------------------------------------------------------------------------------------------------------------------------------------------------------------------------------------------------------------------------------------------------------------------------------------------------------------------------------------------------------------------------------------------------------------------------------------------------------------------------------------------------------------------------------------------------------------------------------------------------------------------------------------------------------------------------------------------------------------------------------------------------------------------------------------------------------------------------------------------------------------------------------------------------------------------------------------------------------------------------------------------------------------------------------------------------------------------------------------------------------------------------------------------------------------------------------------------------------------------------------------------------------------------------------------------------------------------------------------------------------------------------------------------------------------------------------------------------------------------------------------------------------------------------------------------------------------------------------------------------------------------------------------------------------------------------------------------------------------------------------------------------------------------------------------------------------------------------------------------------------------------------------------------------------------------------------------------------------------------------------------------------------------------------------------------------------------------------------------------------------------------------------------------------------------------------------------------------------------------------------------------------------------------------------------------------------------------------------------------------------------------------------------------------------------------------------------------------------------------------------------------------------------------------------------------------------------------------------------------------------------------------------------------------------------------------------------------------------------------------------------------------------------------------------------------------------------------------------------------------------------------------------------------------------------------------------------------------------------------------------------------------------------------------------------------------------------------------------------------------------------------------------------------------------------------------------------------------------------------------------------------------------------------------------------------------------------------------------------------------------------------------------------------------------------------------------------------------------------------------------------------------------------------------------------------------------------------------------------------------------------------------------------------------------------------------------------------------------------------------------------------------------------------------------------------------------------------------------------------------------------------------------------------------------------------------------------------------------------------------------------------------------------------------------------------------------------------------------------------------------------------------------------------------------------------------------------------------------------------------------------------------------------------------------------------------------------------------------------------------------------------------------------------------------------------------------------------------------------------------------------------------------------------------------------------------------------------------------------------------------------------------------------------------------------------------------------------------------------------------------------------------------------------------------------------------------------------------------------------------------------------------------------------------------------------------------------------------------------------------------------------------------------------------------------------------------------------------------------------------------------------------------------------------------------------------------------------------------------------------------------------------------------------------------------------------------------------------------------------------------------------------------------------------------------------------------------------------------------------------------------------------------------------------------------------------------------------------------------------------------------------------------------------------------------------------------------------------------------------------------------------------------------------------------------------------------------------------------------------------------------------------------------------------------------------------------------------------------------------------------------------------------------------------------------------------------------------------------------------------------------------------------------------------------------------------------------------------------------------------------------------------------------------------------------------------------------------------------------------------------------------------------------------------------------------------------------------------------|------------------------------------------------------------------------------------------------------------------------------------------------------------------------------------------------------------------------------------------------------------------------------------------|----------------------------------------------------------------------------------------------------------------------------------------------------------------------------------------------|-------------------------------------------------------------------------------------------------------------|
| EPI_ISL_3163403, EPI_ISL_3228396, EPI_ISL_3228839, EPI_ISL_3228964, EPI_ISL_3240191, EPI_ISL_3240569, EPI_ISL_3240656, EPI_ISL_3240851, EPI_ISL_3240981, EPI_ISL_3252138, EPI_ISL_3252640, EPI_ISL_3340332, EPI_ISL_3340346, EPI_ISL_3340608, EPI_ISL_3357055, EPI_ISL_3357061, EPI_ISL_3357440, EPI_ISL_3357693, EPI_ISL_3357751, EPI_ISL_3357880, EPI_ISL_3383970, EPI_ISL_3417869, EPI_ISL_3417881, EPI_ISL_3418153, EPI_ISL_3418160, EPI_ISL_3418331, EPI_ISL_3449485, EPI_ISL_3449625, EPI_ISL_3450219, EPI_ISL_3450247, EPI_ISL_3450675, EPI_ISL_3462933, EPI_ISL_3463959, EPI_ISL_3464220, EPI_ISL_3530384, EPI_ISL_3530884, EPI_ISL_3530888, EPI_ISL_3531497, EPI_ISL_3531656, EPI_ISL_3531701, EPI_ISL_3531850, EPI_ISL_3531963, EPI_ISL_3531966, EPI_ISL_3532172, EPI_ISL_3533209, EPI_ISL_3566775, EPI_ISL_3566850, EPI_ISL_3567209, EPI_ISL_3567309, EPI_ISL_3567585, EPI_ISL_3567779, EPI_ISL_3567827, EPI_ISL_3567979, EPI_ISL_3631752, EPI_ISL_3631795, EPI_ISL_3632017, EPI_ISL_3632031, EPI_ISL_3632362, EPI_ISL_3632399, EPI_ISL_3632476, EPI_ISL_3632554, EPI_ISL_3632762, EPI_ISL_3632851, EPI_ISL_3632858, EPI_ISL_3633346, EPI_ISL_3633810, EPI_ISL_3633819, EPI_ISL_3664531, EPI_ISL_3664537, EPI_ISL_3664592, EPI_ISL_3664638, EPI_ISL_3664735, EPI_ISL_3664854, EPI_ISL_3664857, EPI_ISL_3665217, EPI_ISL_3665219, EPI_ISL_3665262, EPI_ISL_3665272, EPI_ISL_3665494, EPI_ISL_3707913, EPI_ISL_3708094, EPI_ISL_3708185, EPI_ISL_3708194, EPI_ISL_3708201, EPI_ISL_3708328, EPI_ISL_3708333, EPI_ISL_3708335, EPI_ISL_3708378, EPI_ISL_3708402, EPI_ISL_3708415, EPI_ISL_3708534, EPI_ISL_3708596, EPI_ISL_3708673, EPI_ISL_3708744, EPI_ISL_3708756, EPI_ISL_3724621, EPI_ISL_3724630, EPI_ISL_3724668, EPI_ISL_3724798, EPI_ISL_3724941, EPI_ISL_3725092, EPI_ISL_3725094, EPI_ISL_3725168, EPI_ISL_3725171, EPI_ISL_3725273, EPI_ISL_3725422, EPI_ISL_3725478, EPI_ISL_3725578, EPI_ISL_3725617, EPI_ISL_3725632, EPI_ISL_3725736, EPI_ISL_3725762, EPI_ISL_3769721, EPI_ISL_3769748, EPI_ISL_3769851, EPI_ISL_3769909, EPI_ISL_3769935, EPI_ISL_3769948, EPI_ISL_3769992, EPI_ISL_3770001, EPI_ISL_3770073, EPI_ISL_3770083, EPI_ISL_3770144, EPI_ISL_3770156, EPI_ISL_3770161, EPI_ISL_3770263, EPI_ISL_3770271, EPI_ISL_3770363, EPI_ISL_3770401, EPI_ISL_3770411, EPI_ISL_3806574, EPI_ISL_3839338, EPI_ISL_3839374, EPI_ISL_3839690, EPI_ISL_3839737, EPI_ISL_3839809, EPI_ISL_3839894, EPI_ISL_3839896, EPI_ISL_3839995, EPI_ISL_3840009, EPI_ISL_3840123, EPI_ISL_3840192, EPI_ISL_3840240, EPI_ISL_3840281, EPI_ISL_3840426, EPI_ISL_3840428, EPI_ISL_3903743, EPI_ISL_3903811, EPI_ISL_3903820, EPI_ISL_3903934, EPI_ISL_3904113, EPI_ISL_3904127, EPI_ISL_3904149, EPI_ISL_3904170, EPI_ISL_3904183, EPI_ISL_3904226, EPI_ISL_3904231, EPI_ISL_3904306, EPI_ISL_3904316, EPI_ISL_3904330, EPI_ISL_3904358, EPI_ISL_3904368, EPI_ISL_3904381, EPI_ISL_3916816, EPI_ISL_3916830, EPI_ISL_3916845, EPI_ISL_3916898, EPI_ISL_3916980, EPI_ISL_3917058, EPI_ISL_3917084, EPI_ISL_3917086, EPI_ISL_3917123, EPI_ISL_3917157, EPI_ISL_3917312, EPI_ISL_3917349, EPI_ISL_3917358, EPI_ISL_3917472, EPI_ISL_3917568, EPI_ISL_3917604, EPI_ISL_3917613, EPI_ISL_3917660, EPI_ISL_3917771, EPI_ISL_3917792, EPI_ISL_3917934, EPI_ISL_3948944, EPI_ISL_3949012, EPI_ISL_3949117, EPI_ISL_3949154, EPI_ISL_3949164, EPI_ISL_3949241, EPI_ISL_3949322, EPI_ISL_3949477, EPI_ISL_3989411, EPI_ISL_3989474, EPI_ISL_3989488, EPI_ISL_3989515, EPI_ISL_3989532, EPI_ISL_3989596, EPI_ISL_3989601, EPI_ISL_3989622, EPI_ISL_3989646, EPI_ISL_3989672, EPI_ISL_3989684, EPI_ISL_3989760, EPI_ISL_3989826, EPI_ISL_3989843, EPI_ISL_3989886, EPI_ISL_3990005, EPI_ISL_3990078, EPI_ISL_3990134, EPI_ISL_3990167, EPI_ISL_3990308, EPI_ISL_4006987, EPI_ISL_4007004, EPI_ISL_4007016, EPI_ISL_4007091, EPI_ISL_4007102, EPI_ISL_4007138, EPI_ISL_4007214, EPI_ISL_4007299, EPI_ISL_4007362, EPI_ISL_4007372, EPI_ISL_4007434, EPI_ISL_4007442, EPI_ISL_4007606, EPI_ISL_4007690, EPI_ISL_4007722, EPI_ISL_4007800, EPI_ISL_4007870, EPI_ISL_4007964, EPI_ISL_4008007, EPI_ISL_4008147, EPI_ISL_4008291, EPI_ISL_4008323, EPI_ISL_4008350, EPI_ISL_4049727, EPI_ISL_4049734, EPI_ISL_4049745, EPI_ISL_4049747, EPI_ISL_4049755, EPI_ISL_4049797, EPI_ISL_4049835, EPI_ISL_4049855, EPI_ISL_4049902, EPI_ISL_4049919, EPI_ISL_4049971, EPI_ISL_4049981, EPI_ISL_4049997, EPI_ISL_4050061, EPI_ISL_4050069, EPI_ISL_4050075, EPI_ISL_4050081, EPI_ISL_4050098, EPI_ISL_4050105, EPI_ISL_4050141, EPI_ISL_4050169, EPI_ISL_4050224, EPI_ISL_4050314, EPI_ISL_4050327, EPI_ISL_4050341, EPI_ISL_4050474, EPI_ISL_4050478, EPI_ISL_4050485, EPI_ISL_4050546, EPI_ISL_4050550, EPI_ISL_4069412, EPI_ISL_4069421, EPI_ISL_4069423, EPI_ISL_4069432, EPI_ISL_4069473, EPI_ISL_4105541, EPI_ISL_4105551, EPI_ISL_4105565, EPI_ISL_4105572, EPI_ISL_4105582, EPI_ISL_4105707, EPI_ISL_4105710, EPI_ISL_4105826, EPI_ISL_4105861, EPI_ISL_4105887, EPI_ISL_4105932, EPI_ISL_4105972, EPI_ISL_4105981, EPI_ISL_4170430, EPI_ISL_4170432, EPI_ISL_4170503, EPI_ISL_4170643, EPI_ISL_4170682, EPI_ISL_4199665, EPI_ISL_4199682, EPI_ISL_4199763, EPI_ISL_4199801, EPI_ISL_4199811, EPI_ISL_4199845, EPI_ISL_4199857, EPI_ISL_4199878, EPI_ISL_4199882, EPI_ISL_4199909, EPI_ISL_4199919, EPI_ISL_4199925, EPI_ISL_4199943, EPI_ISL_4199961, EPI_ISL_4199982, EPI_ISL_4199995, EPI_ISL_4200002, EPI_ISL_4200042, EPI_ISL_4200068, EPI_ISL_4200158, EPI_ISL_4200218, EPI_ISL_4200235, EPI_ISL_4200307, EPI_ISL_4200321, EPI_ISL_4200353, EPI_ISL_4200373, EPI_ISL_4200377, EPI_ISL_4200385, EPI_ISL_4200387, EPI_ISL_4200388, EPI_ISL_4200400, EPI_ISL_4200430, EPI_ISL_4200488, EPI_ISL_4200500, EPI_ISL_4200525, EPI_ISL_4200527, EPI_ISL_4200546, EPI_ISL_4200553, EPI_ISL_4200598, EPI_ISL_4200629, EPI_ISL_4200635, EPI_ISL_4200652, EPI_ISL_4232687, EPI_ISL_4232688, EPI_ISL_4232718, EPI_ISL_4232722, EPI_ISL_4232736, EPI_ISL_4232741, EPI_ISL_4232766, EPI_ISL_4232782, EPI_ISL_4232902, EPI_ISL_4232925, EPI_ISL_4233010, EPI_ISL_4233060, EPI_ISL_4233071, EPI_ISL_4233102, EPI_ISL_4233130, EPI_ISL_4233134, EPI_ISL_4233208, EPI_ISL_4233209, EPI_ISL_4233226, EPI_ISL_4233276, EPI_ISL_4256634, EPI_ISL_4256681, EPI_ISL_4256712, EPI_ISL_4256725, EPI_ISL_4257190, EPI_ISL_4257413, EPI_ISL_4257523, EPI_ISL_4257686, EPI_ISL_4257694, EPI_ISL_4257918, EPI_ISL_4258000, EPI_ISL_4258023, EPI_ISL_4258058, EPI_ISL_4258099, EPI_ISL_4258100, EPI_ISL_4258117, EPI_ISL_4258122, EPI_ISL_4258127, EPI_ISL_4258136, EPI_ISL_4258140, EPI_ISL_4258181, EPI_ISL_4258197, EPI_ISL_4258205, EPI_ISL_4258245, EPI_ISL_4258254, EPI_ISL_4258268, EPI_ISL_4258273, EPI_ISL_4258293, EPI_ISL_4258305, EPI_ISL_4258307, EPI_ISL_4258349, EPI_ISL_4303421, EPI_ISL_4303436, EPI_ISL_4303481, EPI_ISL_4303544, EPI_ISL_4303547, EPI_ISL_4303554, EPI_ISL_4303558, EPI_ISL_4303568, EPI_ISL_4303573, EPI_ISL_4303578, EPI_ISL_4303590, EPI_ISL_4303605, EPI_ISL_4303624, EPI_ISL_4303625, EPI_ISL_4303658, EPI_ISL_4354720, EPI_ISL_4354755, EPI_ISL_4354776, EPI_ISL_4354817, EPI_ISL_4354828, EPI_ISL_4354834, EPI_ISL_4354848, EPI_ISL_4354955, EPI_ISL_4355021, EPI_ISL_4355118, EPI_ISL_4355181, EPI_ISL_4355283, EPI_ISL_4355456, EPI_ISL_4355627, EPI_ISL_4355633, EPI_ISL_4355658, EPI_ISL_4355659, EPI_ISL_4355668, EPI_ISL_4355714, EPI_ISL_4355794, EPI_ISL_4355800, EPI_ISL_4355809, EPI_ISL_4355833, EPI_ISL_4355885, EPI_ISL_4355928, EPI_ISL_4394057, EPI_ISL_4394097, EPI_ISL_4447726, EPI_ISL_4447824, EPI_ISL_4447881, EPI_ISL_4448077, EPI_ISL_4448147, EPI_ISL_4448227, EPI_ISL_4448243, EPI_ISL_4448267, EPI_ISL_4448327, EPI_ISL_4448361, EPI_ISL_4448398, EPI_ISL_4448474, EPI_ISL_4448498, EPI_ISL_4448581, EPI_ISL_4448657, EPI_ISL_4448677, EPI_ISL_4448808, EPI_ISL_4448826, EPI_ISL_4448858, EPI_ISL_4448919, EPI_ISL_4449013, EPI_ISL_4449014, EPI_ISL_4449021, EPI_ISL_4449032, EPI_ISL_4449049, EPI_ISL_4473511, EPI_ISL_4473524, EPI_ISL_4473676, EPI_ISL_4473698, EPI_ISL_4473747, EPI_ISL_4473775, EPI_ISL_4473812, EPI_ISL_4520857, EPI_ISL_4520876, EPI_ISL_4520889, EPI_ISL_4520927, EPI_ISL_4520928, EPI_ISL_4520955, EPI_ISL_4520959, EPI_ISL_4520961, EPI_ISL_4520986, EPI_ISL_4521017, EPI_ISL_4521068, EPI_ISL_4521076, EPI_ISL_4521131, EPI_ISL_4521138, EPI_ISL_4521141, EPI_ISL_4521173, EPI_ISL_4521193, EPI_ISL_4521243, EPI_ISL_4551362, EPI_ISL_4551377, EPI_ISL_4625750, EPI_ISL_4625736, EPI_ISL_4625748, EPI_ISL_4625767, EPI_ISL_4625875, EPI_ISL_4625896, EPI_ISL_4625898, EPI_ISL_4625917, EPI_ISL_4625942, EPI_ISL_4626084, EPI_ISL_4626101, EPI_ISL_4626133, EPI_ISL_4626165, EPI_ISL_4626201, EPI_ISL_4626222, EPI_ISL_4626296, EPI_ISL_4626319, EPI_ISL_4626329, EPI_ISL_4626366, EPI_ISL_4626412, EPI_ISL_4626525, EPI_ISL_4626541, EPI_ISL_4626607, EPI_ISL_4626664, EPI_ISL_4626672, EPI_ISL_4626683, EPI_ISL_4626699, EPI_ISL_4626715, EPI_ISL_4626721, EPI_ISL_4626728, EPI_ISL_4626758 | Department of Bacteria, Parasites and Fungi, Statens Serum Institut, Copenhagen, Denmark<br>Department of Clinical Microbiology and Center for Genomic Medicine, Rigshospitalet, Copenhagen, Denmark<br>Department of Clinical Microbiology, Odense University Hospital, Odense, Denmark | Statens Serum Institut Bioinformatics and Microbial Genomics<br>Statens Serum Institut Bioinformatics and Microbial Genomics<br>Statens Serum Institut Bioinformatics and Microbial Genomics | Danish Covid-19 Genome Consortium<br>Danish Covid-19 Genome Consortium<br>Danish Covid-19 Genome Consortium |
| see above                                                                                                                                                                                                                                                                                                                                                                                                                                                                                                                                                                                                                                                                                                                                                                                                                                                                                                                                                                                                                                                                                                                                                                                                                                                                                                                                                                                                                                                                                                                                                                                                                                                                                                                                                                                                                                                                                                                                                                                                                                                                                                                                                                                                                                                                                                                                                                                                                                                                                                                                                                                                                                                                                                                                                                                                                                                                                                                                                                                                                                                                                                                                                                                                                                                                                                                                                                                                                                                                                                                                                                                                                                                                                                                                                                                                                                                                                                                                                                                                                                                                                                                                                                                                                                                                                                                                                                                                                                                                                                                                                                                                                                                                                                                                                                                                                                                                                                                                                                                                                                                                                                                                                                                                                                                                                                                                                                                                                                                                                                                                                                                                                                                                                                                                                                                                                                                                                                                                                                                                                                                                                                                                                                                                                                                                                                                                                                                                                                                                                                                                                                                                                                                                                                                                                                                                                                                                                                                                                                                                                                                                                                                                                                                                                                                                                                                                                                                                                                                                                                                                                                                                                                                                                                                                                                                                                                                                                                                                                                                                                                                                                                                                                                                                                                                                                                                                                                                                                                                                                                                                                                                                                                                                                                                                                                                                                                                                                                                                                |                                                                                                                                                                                                                                                                                          |                                                                                                                                                                                              |                                                                                                             |
| EPI_ISL_3948940, EPI_ISL_3949518, EPI_ISL_4303431, EPI_ISL_4303574                                                                                                                                                                                                                                                                                                                                                                                                                                                                                                                                                                                                                                                                                                                                                                                                                                                                                                                                                                                                                                                                                                                                                                                                                                                                                                                                                                                                                                                                                                                                                                                                                                                                                                                                                                                                                                                                                                                                                                                                                                                                                                                                                                                                                                                                                                                                                                                                                                                                                                                                                                                                                                                                                                                                                                                                                                                                                                                                                                                                                                                                                                                                                                                                                                                                                                                                                                                                                                                                                                                                                                                                                                                                                                                                                                                                                                                                                                                                                                                                                                                                                                                                                                                                                                                                                                                                                                                                                                                                                                                                                                                                                                                                                                                                                                                                                                                                                                                                                                                                                                                                                                                                                                                                                                                                                                                                                                                                                                                                                                                                                                                                                                                                                                                                                                                                                                                                                                                                                                                                                                                                                                                                                                                                                                                                                                                                                                                                                                                                                                                                                                                                                                                                                                                                                                                                                                                                                                                                                                                                                                                                                                                                                                                                                                                                                                                                                                                                                                                                                                                                                                                                                                                                                                                                                                                                                                                                                                                                                                                                                                                                                                                                                                                                                                                                                                                                                                                                                                                                                                                                                                                                                                                                                                                                                                                                                                                                                       | Department of Clinical Microbiology and Center for Genomic Medicine, Rigshospitalet, Copenhagen, Denmark                                                                                                                                                                                 | Statens Serum Institut Bioinformatics and Microbial Genomics                                                                                                                                 | Danish Covid-19 Genome Consortium                                                                           |
| EPI_ISL_3339841, EPI_ISL_3989828                                                                                                                                                                                                                                                                                                                                                                                                                                                                                                                                                                                                                                                                                                                                                                                                                                                                                                                                                                                                                                                                                                                                                                                                                                                                                                                                                                                                                                                                                                                                                                                                                                                                                                                                                                                                                                                                                                                                                                                                                                                                                                                                                                                                                                                                                                                                                                                                                                                                                                                                                                                                                                                                                                                                                                                                                                                                                                                                                                                                                                                                                                                                                                                                                                                                                                                                                                                                                                                                                                                                                                                                                                                                                                                                                                                                                                                                                                                                                                                                                                                                                                                                                                                                                                                                                                                                                                                                                                                                                                                                                                                                                                                                                                                                                                                                                                                                                                                                                                                                                                                                                                                                                                                                                                                                                                                                                                                                                                                                                                                                                                                                                                                                                                                                                                                                                                                                                                                                                                                                                                                                                                                                                                                                                                                                                                                                                                                                                                                                                                                                                                                                                                                                                                                                                                                                                                                                                                                                                                                                                                                                                                                                                                                                                                                                                                                                                                                                                                                                                                                                                                                                                                                                                                                                                                                                                                                                                                                                                                                                                                                                                                                                                                                                                                                                                                                                                                                                                                                                                                                                                                                                                                                                                                                                                                                                                                                                                                                         | Department of Clinical Microbiology, Odense University Hospital, Odense, Denmark                                                                                                                                                                                                         | Statens Serum Institut Bioinformatics and Microbial Genomics                                                                                                                                 | Danish Covid-19 Genome Consortium                                                                           |
